# Supplementary material for: Naphthyl-Substituted Indole and Pyrrole Carboxylic Acids as Effective Antibiotic Potentiators—Inhibitors of Bacterial Cystathionine γ-Lyase
Source: MDPI journal article supplement (doi:10.3390/ijms242216331), 2023-11-15
Supplement: s1 [file s1]

## Supporting Information

### Naphthyl-Substituted Indole and Pyrrole Carboxylic Acids as Effective Antibiotic Potentiators - Inhibitors of bCSE

Andrey S. Kuzovlev <sup>1,\*</sup>, Mikhail D. Zybalov <sup>1</sup>, Andrey V. Golovin <sup>2,3</sup>, Maxim A. Gureev <sup>3,4</sup>, Mariia A. Kasatkina <sup>1</sup>, Mikhail V. Biryukov <sup>1,5</sup>, Albina R. Belik <sup>1</sup>, Sergey A. Silonov <sup>1,6</sup>, Maxim A. Yunin <sup>1</sup>, Nailya A. Zigangirova <sup>7</sup>, Vasiliy V. Reshetnikov <sup>1,8</sup>, Yulia E. Isakova <sup>1</sup>, Yuri B. Porozov <sup>3,4</sup>, Roman A. Ivanov <sup>1</sup>

<sup>1</sup> Translational Medicine Research Center, Sirius University of Science and Technology, Olympic Ave. 1, 354340 Sochi, Russia; zybalov.mikhail@gmail.com (M.D.Z.); kasatkina.ma@talantiuspeh.ru (M.A.K.); belik.ar@talantiuspeh.ru (A.R.B.); yunin.ma@talantiuspeh.ru (M.A.Y.); isakova.ye@talantiuspeh.ru (Y.E.I.); ivanov.ra@talantiuspeh.ru (R.A.I.)

<sup>2</sup> Faculty of Bioengineering and Bioinformatics, Lomonosov Moscow State University, 1/73 Leninskie gori St., 119234 Moscow, Russia; golovin.av@talantiuspeh.ru

<sup>3</sup> Laboratory of bioinformatics, Center of AI and information technologies, Sirius University of Science and Technology, Olympic Ave. 1, 354340 Sochi, Russia; gureev\_m\_a@staff.sechenov.ru

<sup>4</sup> Laboratory of bio- and chemoinformatics, Institute of Biodesign and Modeling of Complex Systems, I.M. Sechenov First Moscow State Medical University, 8/2 Trubetskaya, Moscow, 119991, Russia; porozov\_yu\_b@staff.sechenov.ru

<sup>5</sup> Faculty of Biology, Lomonosov Moscow State University, 1/12 Leninskie gori St., 119234 Moscow, Russia; biryukov.mv@talantiuspeh.ru

<sup>6</sup> Laboratory of Structural Dynamics, Stability and Folding of Proteins, Institute of Cytology, Russian Academy of Sciences, 4 Tikhoretsky Ave., 194064 St. Petersburg, Russia; silonov.sa@talantiuspeh.ru

<sup>7</sup> Medical Microbiology Department, Laboratory of chlamydiosis, National Research Center for Epidemiology and Microbiology named after N. F. Gamaleya, 18 Gamaleya St., 123098 Moscow, Russia; zigangirova@mail.ru

<sup>8</sup> Institute of Cytology and Genetics, Siberian Branch of RAS, 10 Akademika Lavrentyeva, 630090 Novosibirsk, Russia; reshetnikov.vv@talantiuspeh.ru

\* Correspondence: a.s.kuzovlev@gmail.com

## Synthesis and characterization

### Synthesis of indole-6-carboxylic acid

#### 4-Methyl-3-nitrobenzoic acid

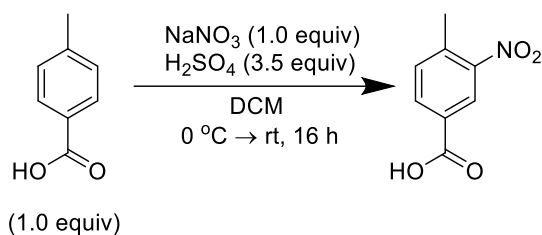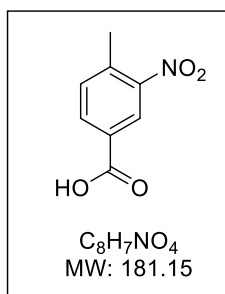

The compound was prepared according to a slightly altered procedure from the literature [54]. In a round-bottom flask (100 ml), to a solution of *p*-toluic acid (5.00 g, 36.72 mmol) in DCM (40 ml),  $\text{NaNO}_3$  (2.90 g, 36.72 mmol) was added with stirring. After 10 min,  $\text{H}_2\text{SO}_4$  (7.03 ml, 128.53 mmol) was introduced dropwise in an inert atmosphere at  $0\text{ }^\circ\text{C}$ . The reaction mixture was slowly heated to room temperature and stirred until completion (monitored by TLC) for 16 h. Next, the reaction mixture was poured into 200 ml of cold water. The organic layer was washed three times with water and brine, dried over  $\text{MgSO}_4$ , filtered, and concentrated in vacuum thereby affording the title product as a yellow oil (6.50 g, 100%). Spectral and physical data were in agreement with the literature [54].

**$^1\text{H}$  NMR** (300 MHz,  $\text{DMSO}-d_6$ )  $\delta$  13.25 (s, 1H), 8.41 (d,  $J = 1.8$  Hz, 1H), 8.12 (dd,  $J = 7.9, 1.8$  Hz, 1H), 7.63 (d,  $J = 8.0$  Hz, 1H), 2.58 (s, 3H).

**$^{13}\text{C}$  NMR** (75 MHz,  $\text{DMSO}-d_6$ )  $\delta$  165.49, 148.84, 137.64, 133.39, 133.35, 130.06, 124.94, 19.66.

#### Methyl 4-methyl-3-nitrobenzoate

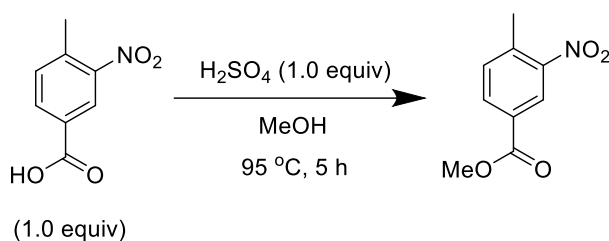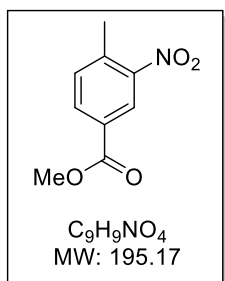

In a round-bottom flask, 4-methyl-3-nitrobenzoic acid (6.50 g, 36.72 mmol) was dissolved in methanol (30 ml); then  $\text{H}_2\text{SO}_4$  (1.90 ml, 36.7 mmol) was added to the solution. The resulting mixture was refluxed in an oil bath ( $95\text{ }^\circ\text{C}$ ) for 5 h. The reaction mixture was evaporated in a rotary evaporator; poured into 30 ml of water; extracted with EtOAc ( $3 \times 30$  ml); washed with water, a saturated  $\text{NaHCO}_3$  solution, and brine; dried over  $\text{Na}_2\text{SO}_4$ ; and concentrated *in vacuo*. The residue was purified by FCC on silica gel (in a hexane/EtOAc mixture at 94:6) to obtain the title product as a yellow solid (3.21 g, 49%). Spectral and physical data were consistent with the literature [55].

**$^1\text{H}$  NMR** (300 MHz,  $\text{DMSO}-d_6$ )  $\delta$  8.42 (d,  $J = 1.8$  Hz, 1H), 8.14 (dd,  $J = 8.0, 1.8$  Hz, 1H), 7.67 (d,  $J = 8.0$  Hz, 1H), 3.90 (s, 3H), 2.59 (s, 3H).

**$^{13}\text{C}$  NMR** (75 MHz,  $\text{DMSO}-d_6$ )  $\delta$  164.47, 148.86, 138.15, 133.56, 133.14, 128.72, 124.81, 52.58, 19.66.

*Methyl (E)-4-(2-(dimethylamino)vinyl)-3-nitrobenzoate*

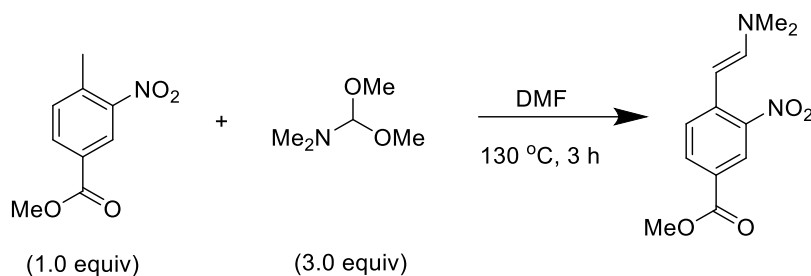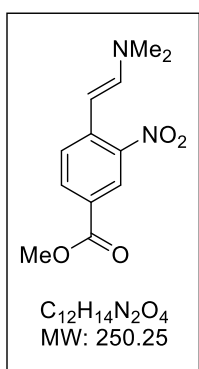

The compound was prepared according to a slightly altered procedure from the literature [56]. In a round-bottom flask, methyl 4-methyl-3-nitrobenzoate (3.20 g, 16.47 mmol) was dissolved in DMF (20 ml); then dimethyl acetal of DMF (6.60 ml, 49.41 mmol) was added. The resulting solution was stirred and refluxed in an oil bath (130 °C) for 3 h. The reaction mixture was evaporated *in vacuo* thus yielding the title product as a red crumbly powder (3.40 g, 83%). Spectral and physical data were in agreement with the literature [56].

**$^1\text{H}$  NMR** (400 MHz,  $\text{DMSO}-d_6$ )  $\delta$  8.29 (t,  $J$  = 1.1 Hz, 1H), 7.78 (d,  $J$  = 1.1 Hz, 2H), 7.74 (d,  $J$  = 13.2 Hz, 1H), 5.77 (d,  $J$  = 13.2 Hz, 1H), 3.83 (s, 3H), 2.97 (s, 6H).

**$^{13}\text{C}$  NMR** (101 MHz,  $\text{DMSO}-d_6$ )  $\delta$  164.88, 149.15, 142.08, 140.57, 131.61, 126.86, 123.36, 121.01, 88.44, 52.00.

*Methyl 1H-indole-6-carboxylate*

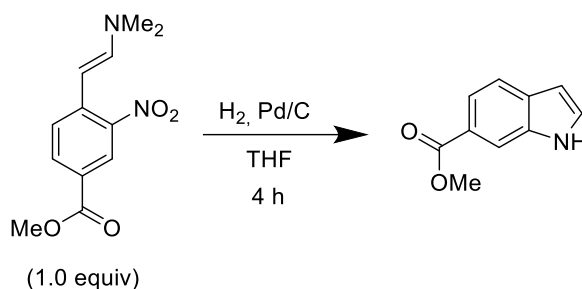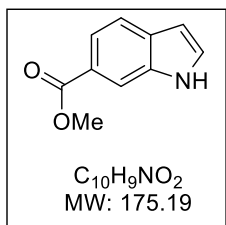

The compound was prepared according to a slightly modified procedure from the literature [56]. Into a two-neck round-bottom flask charged with a solution of methyl (E)-4-(2-(dimethylamino)vinyl)-3-nitrobenzoate (3.40 g, 13.55 mmol) in THF (60 ml), 10% Pd/C (1.33 g, 50% water) was added. Hydrogen was bubbled through the solution for 4 h until no starting compound remained. The catalyst was filtered out in a plug of celite, and the filtrate was evaporated *in vacuo*. The dry residue was dissolved in ethyl acetate and poured into 5% HCl. The aqueous layer was extracted with EtOAc (3  $\times$  15 ml). The combined organic layers were washed with water, a saturated  $\text{NaHCO}_3$  solution, and brine, then dried over  $\text{Na}_2\text{SO}_4$ . After filtration and evaporation of the solvent, the residue was purified by column chromatography in isocratic mode (eluent: DCM) to obtain the pure title product as a white solid (2.10 g, 88%). Spectral and physical data were consistent with the literature [56].

**<sup>1</sup>H NMR** (400 MHz, DMSO-*d*<sub>6</sub>) δ 11.48 (s, 1H), 8.08 (d, *J* = 1.2 Hz, 1H), 7.62 (s, 2H), 7.59 (t, *J* = 2.8 Hz, 1H), 6.53 (t, *J* = 2.3 Hz, 1H), 3.85 (s, 3H).

**<sup>13</sup>C NMR** (101 MHz, DMSO-*d*<sub>6</sub>) δ 167.24, 135.10, 131.29, 129.21, 121.97, 119.78, 119.45, 113.39, 101.51, 51.69.

#### 1H-indole-6-carboxylic acid

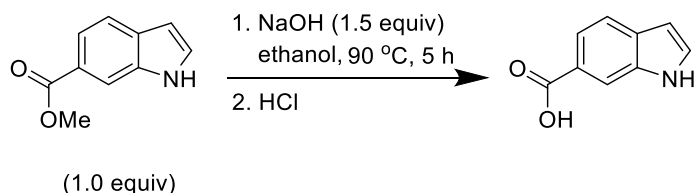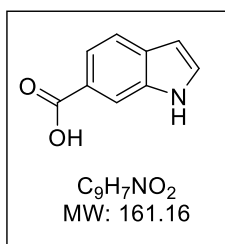

In a round-bottom flask, to a solution of methyl 1H-indole-6-carboxylate (1.00 g, 5.71 mmol) in ethanol (20 ml), NaOH (1.5 M in water, 4.95 ml, 7.42 mmol) was added. The resultant solution was stirred and refluxed in an oil bath (90 °C) for 5 h. After that, the mixture was cooled to room temperature, evaporated *in vacuo*, dissolved in 20 ml of water, and extracted with DCM (3 × 15 ml). The aqueous layer was acidified with HCl to pH 3–4 leading to the formation of an abundant white precipitate. The residue was filtered out, washed four times with 5 ml of distilled water, and dried under reduced pressure overnight thereby yielding the final desired compound as a white solid (0.91 g, 99%). Spectral and physical data were in agreement with the literature [56].

**<sup>1</sup>H NMR** (400 MHz, DMSO-*d*<sub>6</sub>) δ 12.45 (s, 1H), 11.43 (s, 1H), 8.06 (d, *J* = 1.3 Hz, 1H), 7.60 (d, *J* = 1.5 Hz, 2H), 7.56 (t, *J* = 2.8 Hz, 1H), 6.51 (ddd, *J* = 2.9, 1.9, 0.9 Hz, 1H).

**<sup>13</sup>C NMR** (101 MHz, DMSO-*d*<sub>6</sub>) δ 168.35, 135.16, 131.04, 128.85, 123.12, 119.77, 119.56, 113.51, 101.43.

### Synthesis of α-(bromomethyl)naphthalene

#### Methyl 1-naphthoate

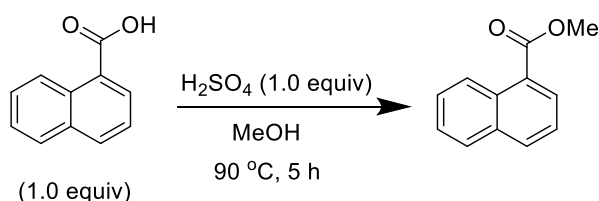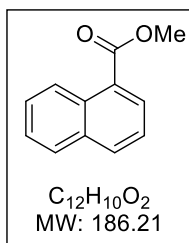

The compound was prepared according to a slightly altered procedure from the literature [57]. In a round-bottom flask, 1-naphthoic acid (5.00 g, 29.04 mmol) was dissolved in methanol (25 ml), then concentrated sulfuric acid (1.55 ml, 29.04 mmol) was added to the solution. The resulting mixture was stirred at reflux in an oil bath (90 °C) for 5 h. The reaction mixture was evaporated *in vacuo*, dissolved in DCM (20 ml), and washed with water (20 ml). The aqueous layer was extracted with DCM (3 × 15 ml). The combined organic layers were washed with water, a saturated NaHCO<sub>3</sub> solution, and brine and dried with Na<sub>2</sub>SO<sub>4</sub>. The obtained dry organic phase was concentrated *in vacuo* thus affording the pure title product as a faint yellow oil (5.01 g, 93%). Spectral and physical data were consistent with the literature [57].

**<sup>1</sup>H NMR** (300 MHz, Chloroform-*d*)  $\delta$  = 8.91 (ddt, *J*=8.6, 1.3, 0.8, 1H), 8.19 (dd, *J*=7.3, 1.4, 1H), 8.02 (dt, *J*=8.3, 1.3, 1H), 7.88 (ddt, *J*=8.1, 1.4, 0.6, 1H), 7.62 (ddd, *J*=8.6, 6.9, 1.6, 1H), 7.57–7.52 (m, 1H), 7.52–7.47 (m, 1H), 4.01 (s, 3H).

**<sup>13</sup>C NMR** (75 MHz, Chloroform-*d*)  $\delta$  168.18, 134.02, 133.49, 131.51, 130.34, 128.68, 127.89, 127.30, 126.35, 125.99, 124.63, 52.25.

#### Naphthalen-1-ylmethanol

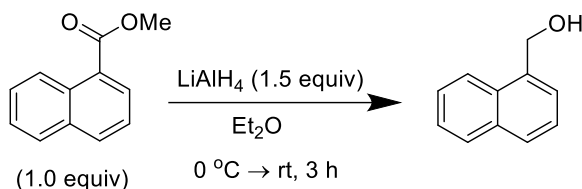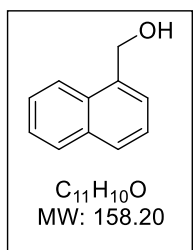

The compound was prepared according to a slightly modified procedure from the literature [58]. Into a round-bottom flask charged with a cooled (ice bath) suspension of  $LiAlH_4$  (0.31 g, 8.06 mmol) in dry diethyl ether (15 ml), a solution of methyl 1-naphthoate (1.00 g, 5.37 mmol) in diethyl ether (5 ml) was added dropwise. After stirring at room temperature for 3 h, TLC (in a hexane/ethyl acetate mixture at 4:1) showed complete conversion of the starting material. The excess of  $LiAlH_4$  was quenched with 30 ml of ethyl acetate followed by dropwise addition of 10% sulfuric acid (40 ml). Stirring was continued until all solids disappeared, and then the layers were separated. The aqueous layer was extracted with EtOAc ( $3 \times 15$  ml), and the combined organic layers were washed with water, a saturated  $NaHCO_3$  solution, and brine and dried with  $Na_2SO_4$ . The obtained dry organic phase was concentrated *in vacuo* thereby affording the pure title product as a light-yellow oil (0.58 g, 68%). Spectral and physical data were consistent with the literature [59].

**<sup>1</sup>H NMR** (300 MHz, DMSO-*d*<sub>6</sub>)  $\delta$  8.11–8.06 (m, 1H), 7.96–7.89 (m, 1H), 7.82 (ddt, *J* = 8.1, 1.4, 0.7 Hz, 1H), 7.59–7.43 (m, 4H), 5.29 (t, *J* = 5.5 Hz, 1H), 4.97 (d, *J* = 5.5 Hz, 2H).

**<sup>13</sup>C NMR** (75 MHz, DMSO-*d*<sub>6</sub>)  $\delta$  137.78, 133.11, 130.65, 128.28, 127.20, 125.82, 125.57, 125.37, 124.18, 123.68, 61.13.

#### 1-(bromomethyl)naphthalene

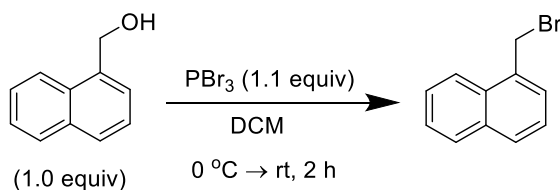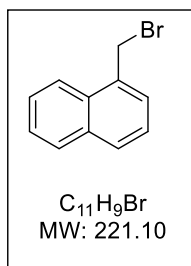

The compound was prepared according to a slightly altered procedure from the literature [60]. To a solution of naphthalen-1-ylmethanol (2.30 g, 14.54 mmol) in DCM (150 ml), phosphorus tribromide (1.52 ml, 15.99 mmol) was slowly added at 0 °C under  $N_2$ . After stirring at room temperature for 2 h, TLC analysis (in a hexane/ethyl acetate mixture at 4:1) revealed complete conversion of the starting material, then the reaction was stopped by slow addition of distilled water. The two phases were separated, the aqueous layer was extracted with DCM ( $3 \times 15$  ml), and the combined organic layers were washed with water, a saturated  $NaHCO_3$  solution, and brine and

dried with Na<sub>2</sub>SO<sub>4</sub>. The resultant dry organic phase was concentrated *in vacuo* to obtain the pure title product as a yellow solid (0.77 g, 98%). Spectral and physical data were in agreement with the literature [59].

**<sup>1</sup>H NMR** (300 MHz, DMSO-*d*<sub>6</sub>) δ 8.19 (d, *J* = 8.4 Hz, 1H), 8.01–7.96 (m, 1H), 7.94 (d, *J* = 8.3 Hz, 1H), 7.71–7.68 (m, 1H), 7.67–7.62 (m, 1H), 7.57 (ddd, *J* = 8.1, 6.8, 1.3 Hz, 1H), 7.47 (dd, *J* = 8.2, 7.0 Hz, 1H), 5.22 (s, 2H).

**<sup>13</sup>C NMR** (75 MHz, DMSO-*d*<sub>6</sub>) δ 133.58, 133.51, 130.60, 129.46, 128.63, 128.10, 126.47, 126.22, 125.55, 123.93, 32.86.

## Synthesis of β-(bromomethyl)naphthalene

### Methyl 2-naphthoate

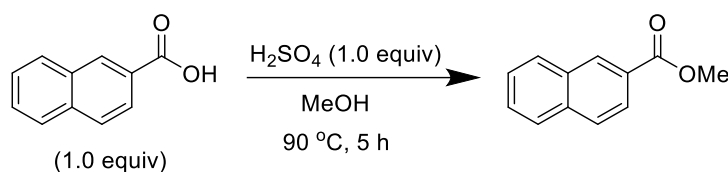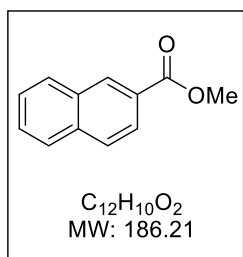

The compound was prepared according to a slightly altered procedure from the literature [57]. In a round-bottom flask, 2-naphthoic acid (5.00 g, 29.04 mmol) was dissolved in methanol (25 ml), then concentrated sulfuric acid (1.55 ml, 29.04 mmol) was added to the solution. The resulting mixture was stirred at reflux in an oil bath (90 °C) for 5 h. The reaction mixture was evaporated *in vacuo*, dissolved in DCM (20 ml), and washed with water (20 ml). The aqueous layer was extracted with DCM (3 × 15 ml). Next, the combined organic layers were washed with water, a saturated NaHCO<sub>3</sub> solution, and brine and dried with Na<sub>2</sub>SO<sub>4</sub>. The obtained dry organic phase was concentrated *in vacuo* thus affording the pure title product as a white solid (4.83 g, 89%). Spectral and physical data were consistent with the literature[57].

**<sup>1</sup>H NMR** (300 MHz, Chloroform-*d*) δ 8.62 (s, 1H), 8.07 (dd, *J* = 8.6, 1.7 Hz, 1H), 7.99–7.91 (m, 1H), 7.88 (d, *J* = 8.5 Hz, 2H), 7.64–7.50 (m, 2H), 3.99 (s, 3H).

**<sup>13</sup>C NMR** (75 MHz, Chloroform-*d*) δ 167.40, 135.69, 132.68, 131.21, 129.50, 128.36, 128.29, 127.91, 127.61, 126.77, 125.39, 52.33.

### Naphthalen-2-ylmethanol

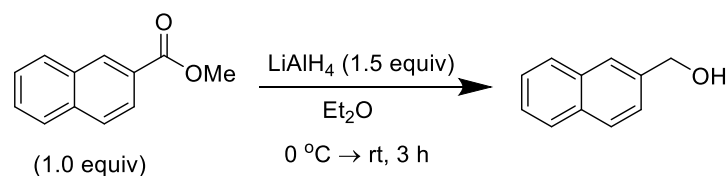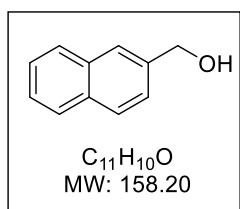

The compound was synthesized according to a slightly altered procedure from the literature [58]. Into a round-bottom flask charged with cooled (ice bath) suspension of LiAlH<sub>4</sub> (0.31 g, 8.06 mmol) in dry diethyl ether (15 ml), a solution of methyl 2-naphthoate (1.00 g, 5.37 mmol) in diethyl ether (5 ml) was added dropwise. After stirring at room temperature for 3 h, TLC analysis (in a hexane/ethyl acetate mixture at 4:1) showed complete conversion of the starting

material. The excess of  $\text{LiAlH}_4$  was quenched with 30 ml of ethyl acetate followed by dropwise addition of 10% sulfuric acid (40 ml). Stirring was continued until all solids disappeared, and then the layers were separated. The aqueous layer was extracted with EtOAc ( $3 \times 15$  ml), and the combined organic layers were washed with water, a saturated  $\text{NaHCO}_3$  solution, and brine and dried with  $\text{Na}_2\text{SO}_4$ . The resultant dry organic phase was concentrated *in vacuo* to obtain the pure title product as a white solid (0.77 g, 90%). Spectral and physical data were in agreement with the literature [59].

**$^1\text{H}$  NMR** (300 MHz,  $\text{DMSO}-d_6$ )  $\delta$  7.91–7.85 (m, 3H), 7.84–7.81 (m, 1H), 7.54–7.42 (m, 3H), 5.31 (t,  $J = 5.7$  Hz, 1H), 4.68 (d,  $J = 5.7$  Hz, 2H).

**$^{13}\text{C}$  NMR** (75 MHz,  $\text{DMSO}-d_6$ )  $\delta$  140.18, 132.91, 132.13, 127.56, 127.51, 127.48, 125.96, 125.40, 125.22, 124.26, 62.97.

### 2-(bromomethyl)naphthalene

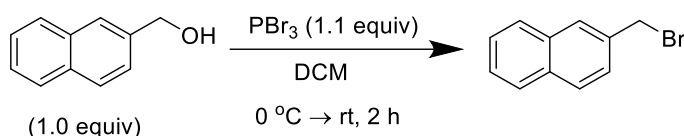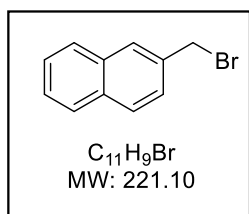

The compound was prepared according to a slightly altered procedure from the literature [60]. To a solution of naphthalen-2-ylmethanol (0.75 g, 4.71 mmol) in DCM (45 ml), phosphorus tribromide (0.49 ml, 5.18 mmol) was slowly added at 0 °C under  $\text{N}_2$ . After stirring at room temperature for 2 h, TLC analysis (in a hexane/ethyl acetate mixture at 4:1) revealed complete conversion of the starting material, then the reaction was stopped by slow addition of distilled water. The two phases were separated, the aqueous layer was extracted with DCM ( $3 \times 15$  ml), and the combined organic layers were washed with water, a saturated  $\text{NaHCO}_3$  solution, and brine and dried with  $\text{Na}_2\text{SO}_4$ . The obtained dry organic phase was concentrated *in vacuo* thereby giving the pure title product as a yellow solid (0.53 g, 51%). Spectral and physical data were consistent with the literature [59].

**$^1\text{H}$  NMR** (300 MHz,  $\text{Chloroform}-d$ )  $\delta$  7.87–7.79 (m, 4H), 7.55–7.46 (m, 3H), 4.68 (s, 2H).

**$^{13}\text{C}$  NMR** (75 MHz,  $\text{Chloroform}-d$ )  $\delta$  135.24, 133.33, 133.24, 128.92, 128.11, 128.01, 127.87, 126.91, 126.72, 126.63, 34.18.

### 1-(naphthalen-1-ylmethyl)-1H-indole-3-carboxylic acid (**1a**)

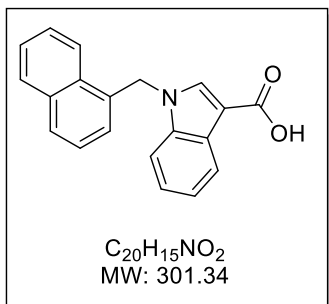

It was synthesized from 1H-indole-3-carboxylic acid (150.0 mg, 0.93 mmol), 1-(bromomethyl)naphthalene (308.7 mg, 1.40 mmol), and NaH (111.7 mg, 2.79 mmol) in DMF (5 ml) according to General procedure 1. The precipitate was filtered out, washed with distilled water, and dried under reduced pressure overnight thus affording **1a** as a white solid (142.1 mg, 51%): mp 238 °C.

**$^1\text{H}$  NMR** (300 MHz,  $\text{DMSO}-d_6$ )  $\delta$  12.04 (br.s, 1H), 8.18–8.12 (m, 1H), 8.08 (dd,  $J = 6.3, 2.9$  Hz, 1H), 8.04–7.96 (m, 2H), 7.89 (d,  $J = 8.3$  Hz, 1H), 7.61–7.52 (m, 3H), 7.45–7.38 (m, 1H), 7.25–7.18 (m, 2H), 6.97 (d,  $J = 7.1$  Hz, 1H), 6.01 (s, 2H).

**<sup>13</sup>C NMR** (75 MHz, DMSO-*d*<sub>6</sub>) δ 165.49, 136.72, 135.30, 133.31, 132.47, 130.42, 128.67, 128.24, 126.62, 126.51, 126.12, 125.50, 124.95, 123.07, 122.48, 121.48, 120.96, 111.04, 107.13, 47.39.

**HRMS** (ESI<sup>+</sup>) calcd. for C<sub>20</sub>H<sub>16</sub>NO<sub>2</sub> [M+H]<sup>+</sup>: 302.1181; found: 302.1174. **HRMS** (ESI<sup>-</sup>) calcd. for C<sub>20</sub>H<sub>14</sub>NO<sub>2</sub> [M-H]<sup>-</sup>: 300.1025; found: 300.0995.

*1-(Naphthalen-2-ylmethyl)-1H-indole-3-carboxylic acid (1b)*

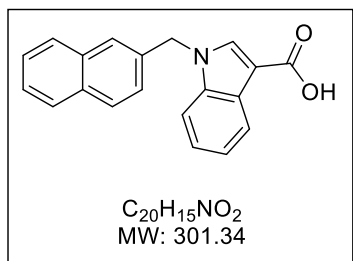

It was prepared from 1H-indole-3-carboxylic acid (72.90 mg, 0.45 mmol), 2-(bromomethyl)naphthalene (150.00 mg, 0.68 mmol), and NaH (42.20 mg, 1.13 mmol) in DMF (5 ml) according to General procedure 1. The precipitate was filtered off, washed with distilled water, and dried under reduced pressure overnight to obtain **1b** as a white solid (78.4 mg, 58%): mp 216 °C.

**<sup>1</sup>H NMR** (300 MHz, DMSO-*d*<sub>6</sub>) δ 12.08 (br.s, 1H), 8.29 (s, 1H), 8.07–8.01 (m, 1H), 7.86 (dd, J = 10.2, 6.5 Hz, 4H), 7.60–7.54 (m, 1H), 7.52–7.46 (m, 2H), 7.41 (dd, J = 8.5, 1.7 Hz, 1H), 7.21–7.14 (m, 2H), 5.67 (s, 2H).

**<sup>13</sup>C NMR** (75 MHz, DMSO-*d*<sub>6</sub>) δ 165.56, 136.34, 135.58, 134.69, 132.75, 132.32, 128.38, 127.67, 127.55, 126.68, 126.42, 126.13, 125.96, 125.34, 122.34, 121.37, 120.90, 111.10, 106.94, 49.75.

**HRMS** (ESI<sup>+</sup>) calcd. for C<sub>20</sub>H<sub>16</sub>NO<sub>2</sub> [M+H]<sup>+</sup>: 302.1181; found: 302.1179. **HRMS** (ESI<sup>-</sup>) calcd. for C<sub>20</sub>H<sub>14</sub>NO<sub>2</sub> [M-H]<sup>-</sup>: 300.1025; found: 300.0995.

*Sodium 1-(naphthalen-1-ylmethyl)-1H-indole-3-carboxylate (1c)*

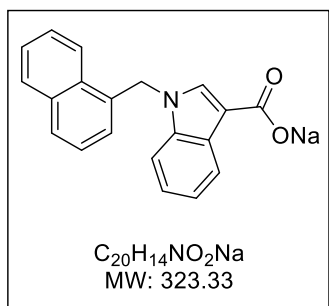

It was prepared from 1H-indole-3-carboxylic acid (150.00 mg, 0.93 mmol), 1-(bromomethyl)naphthalene (308.70 mg, 1.40 mmol), and NaH (111.70 mg, 2.79 mmol) in DMF (5 ml) according to General procedure 1 (without the acidification step). The precipitate was filtered out, washed with distilled water, and dried under reduced pressure overnight thereby affording **1c** as a light-brown solid (160.0 mg, 58%): mp 110 °C.

**<sup>1</sup>H NMR** (300 MHz, DMSO-*d*<sub>6</sub>) δ 8.32–8.28 (m, 1H), 8.15–8.10 (m, 1H), 7.97 (dd, J = 6.7, 2.7 Hz, 1H), 7.87 (d, J = 8.3 Hz, 1H), 7.58–7.53 (m, 3H), 7.42–7.36 (m, 2H), 7.06–7.01 (m, 2H), 6.94 (d, J = 6.1 Hz, 1H), 5.86 (s, 2H).

**<sup>13</sup>C NMR** (75 MHz, DMSO-*d*<sub>6</sub>) δ 169.72, 136.52, 133.39, 133.31, 132.00, 130.58, 128.61, 127.98, 126.46, 126.00, 125.45, 124.95, 123.21, 122.37, 120.79, 119.30, 116.85, 109.69, 46.95.

**HRMS** (ESI<sup>+</sup>) calcd. for C<sub>20</sub>H<sub>16</sub>NO<sub>2</sub> [M+H]<sup>+</sup>: 302.1181; found: 302.1176. **HRMS** (ESI<sup>-</sup>) calcd. for C<sub>20</sub>H<sub>14</sub>NO<sub>2</sub> [M-H]<sup>-</sup>: 300.1025; found: 300.0997.



*1-(Naphthalen-1-ylmethyl)-1H-indole-5-carboxylic acid (3a)*

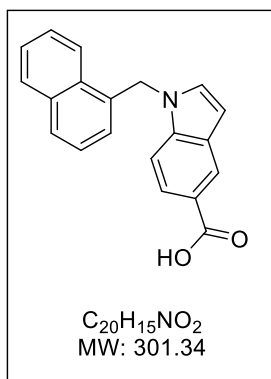

It was prepared from 1H-indole-5-carboxylic acid (150.00 mg, 0.93 mmol), 1-(bromomethyl)naphthalene (308.70 mg, 1.40 mmol), and NaH (111.70 mg, 2.79 mmol) in DMF (5 ml) according to General procedure 1. The precipitate was filtered off, washed with distilled water, and dried under reduced pressure overnight to obtain **3a** as a brown solid (256.4 mg, 91%): mp 225 °C.

**<sup>1</sup>H NMR** (400 MHz, DMSO-*d*<sub>6</sub>) δ 12.47 (br.s, 1H), 8.29 (d, *J* = 1.2 Hz, 1H), 8.18–8.15 (m, 1H), 7.97 (dd, *J* = 7.0, 2.4 Hz, 1H), 7.86 (d, *J* = 8.3 Hz, 1H), 7.73 (dd, *J* = 8.7, 1.6 Hz, 1H), 7.58 (ddd, *J* = 7.1, 5.0, 1.6 Hz, 2H), 7.55–7.51 (m, 2H), 7.41–7.35 (m, 1H), 6.81 (d, *J* = 6.7 Hz, 1H), 6.68 (d, *J* = 2.7 Hz, 1H), 5.98 (s, 2H).

**<sup>13</sup>C NMR** (101 MHz, DMSO-*d*<sub>6</sub>) δ 168.23, 138.47, 133.29, 133.25, 130.82, 130.39, 128.61, 127.97, 127.76, 126.50, 126.07, 125.47, 124.30, 123.25, 123.14, 122.52, 121.87, 109.92, 102.78, 47.23.

**HRMS** (ESI<sup>+</sup>) calcd. for C<sub>20</sub>H<sub>16</sub>NO<sub>2</sub> [M+H]<sup>+</sup>: 302.1181; found: 302.1174. **HRMS** (ESI<sup>−</sup>) calcd. for C<sub>20</sub>H<sub>14</sub>NO<sub>2</sub> [M-H]<sup>−</sup>: 300.1025; found: 300.0993.

*1-(Naphthalen-1-ylmethyl)-1H-indole-6-carboxylic acid (4a)*

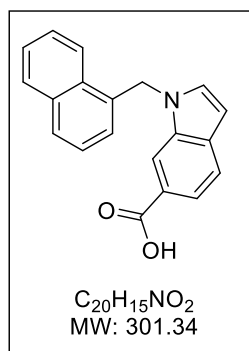

It was prepared from 1H-indole-6-carboxylic acid (150.00 mg, 0.93 mmol), 1-(bromomethyl)naphthalene (308.70 mg, 1.40 mmol), and NaH (111.70 mg, 2.79 mmol) in DMF (5 ml) according to General procedure 1. The precipitate was filtered out, washed with distilled water, and dried under reduced pressure overnight thus giving **4a** as a brown solid (274.0 mg, 98%): mp 228 °C.

**<sup>1</sup>H NMR** (400 MHz, DMSO-*d*<sub>6</sub>) δ 12.57 (s, 1H), 8.18 (d, *J* = 7.8 Hz, 1H), 8.07 (s, 1H), 8.01–7.96 (m, 1H), 7.86 (d, *J* = 8.2 Hz, 1H), 7.67 (s, 2H), 7.64 (d, *J* = 3.1 Hz, 1H), 7.62–7.56 (m, 2H), 7.37 (t, *J* = 7.7 Hz, 1H), 6.72 (d, *J* = 7.0 Hz, 1H), 6.63 (d, *J* = 2.9 Hz, 1H), 6.05 (s, 2H).

**<sup>13</sup>C NMR** (101 MHz, DMSO-*d*<sub>6</sub>) δ 168.19, 135.47, 133.44, 133.26, 132.79, 131.70, 130.32, 128.61, 127.90, 126.49, 126.10, 125.48, 123.88, 123.64, 123.15, 120.26, 120.20, 112.19, 101.61, 47.19.

**HRMS** (ESI<sup>+</sup>) calcd. for C<sub>20</sub>H<sub>16</sub>NO<sub>2</sub> [M+H]<sup>+</sup>: 302.1181; found: 302.1176. **HRMS** (ESI<sup>−</sup>) calcd. for C<sub>20</sub>H<sub>14</sub>NO<sub>2</sub> [M-H]<sup>−</sup>: 300.1025; found: 300.0990.

*1-(Naphthalen-2-ylmethyl)-1H-indole-5-carboxylic acid (4b)*

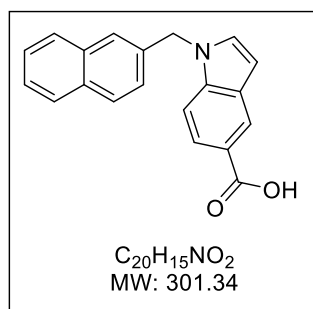

It was prepared from 1H-indole-5-carboxylic acid (72.90 mg, 0.45 mmol), 2-(bromomethyl)naphthalene (150.00 mg, 0.68 mmol), and NaH (42.20 mg, 1.13 mmol) in DMF (5 ml) according to General procedure 1. The precipitate was filtered off, washed with distilled water, and dried under reduced pressure overnight to obtain **4b** as a brown solid (110.70 mg, 81%): mp 212 °C.

**<sup>1</sup>H NMR** (300 MHz, DMSO-*d*<sub>6</sub>) δ 12.46 (br.s, 1H), 8.26 (d, *J* = 1.1 Hz, 1H), 7.88–7.80 (m, 3H), 7.75–7.66 (m, 3H), 7.58 (d, *J* = 8.7 Hz, 1H), 7.51–7.45 (m, 2H), 7.35 (dd, *J* = 8.5, 1.8 Hz, 1H), 6.67 (dd, *J* = 3.2, 0.6 Hz, 1H), 5.63 (s, 2H).

**$^{13}\text{C}$  NMR** (75 MHz,  $\text{DMSO}-d_6$ )  $\delta$  168.20, 138.13, 135.42, 132.77, 132.27, 130.82, 128.29, 127.88, 127.62, 127.54, 126.38, 126.01, 125.56, 125.25, 123.17, 122.40, 121.80, 109.90, 102.66, 49.46.

**HRMS** ( $\text{ESI}^+$ ) calcd. for  $\text{C}_{20}\text{H}_{16}\text{NO}_2$   $[\text{M}+\text{H}]^+$ : 302.1181; found: 302.1173. **HRMS** ( $\text{ESI}^-$ ) calcd. for  $\text{C}_{20}\text{H}_{14}\text{NO}_2$   $[\text{M}-\text{H}]^-$ : 300.1025; found: 300.0984.

*Ethyl 1-(naphthalen-1-ylmethyl)-1H-indole-2-carboxylate (2c)*

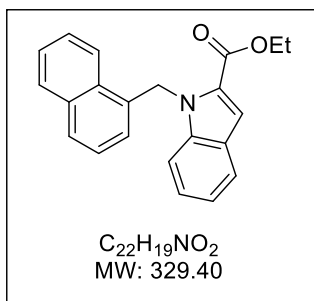

It was synthesized from ethyl 1H-indole-2-carboxylate (150.00 mg, 0.79 mmol), 1-(bromomethyl)naphthalene (262.90 mg, 1.19 mmol), and NaH (47.60 mg, 1.19 mmol) in DMF (5 ml) in accordance with General procedure 2. The residue was purified by FCC on silica gel (in a hexane/EtOAc gradient 20:1  $\rightarrow$  15:1) thereby affording **2c** as a yellow oil (104.5 mg, 40%).

**$^1\text{H}$  NMR** (300 MHz,  $\text{DMSO}-d_6$ )  $\delta$  8.28 (d,  $J$  = 8.4 Hz, 1H), 8.01–7.95 (m, 1H), 7.83–7.75 (m, 2H), 7.64 (ddd,  $J$  = 11.9, 8.0, 1.2 Hz, 2H), 7.49 (d,  $J$  = 0.8 Hz, 1H), 7.46–7.41 (m, 1H), 7.30–7.15 (m, 3H), 6.36 (s, 2H), 6.11–6.04 (m, 1H), 4.17 (q,  $J$  = 7.2 Hz, 2H), 1.16 (t,  $J$  = 7.1 Hz, 3H).

**$^{13}\text{C}$  NMR** (75 MHz,  $\text{DMSO}-d_6$ )  $\delta$  160.99, 139.39, 134.38, 133.09, 129.90, 128.53, 127.56, 127.02, 126.33, 126.02, 125.53, 125.43, 125.37, 122.90, 122.58, 120.96, 120.92, 111.10, 110.74, 60.31, 45.39, 13.92.

**HRMS** ( $\text{ESI}^+$ ) calcd. for  $\text{C}_{22}\text{H}_{20}\text{NO}_2$   $[\text{M}+\text{H}]^+$ : 330.1494; found: 330.1481.

*Ethyl 1-(naphthalen-2-ylmethyl)-1H-indole-2-carboxylate (2d)*

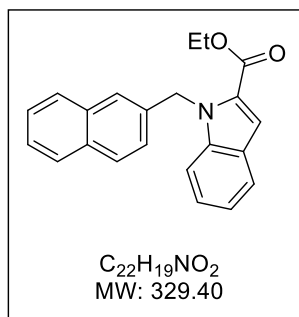

It was prepared from ethyl 1H-indole-2-carboxylate (300.00 mg, 1.58 mmol), 2-(bromomethyl)naphthalene (526.00 mg, 2.38 mmol), and NaH (95.20 mg, 2.38 mmol) in DMF (10 ml) according to General procedure 2. The residue was purified by FCC on silica gel (in hexane/EtOAc gradient 20:1  $\rightarrow$  15:1) to obtain **2d** as yellow oil (501.10 mg, 96%).

**$^1\text{H}$  NMR** (300 MHz,  $\text{DMSO}-d_6$ )  $\delta$  7.83 (t,  $J$  = 7.2 Hz, 2H), 7.75 (d,  $J$  = 7.8 Hz, 2H), 7.61 (d,  $J$  = 8.5 Hz, 1H), 7.50 (s, 1H), 7.47 – 7.41 (m, 3H), 7.30 (t,  $J$  = 7.7 Hz, 1H), 7.22 (d,  $J$  = 8.5 Hz, 1H), 7.15 (t,  $J$  = 7.5 Hz, 1H), 6.02 (s, 2H), 4.28 (q,  $J$  = 7.1 Hz, 2H), 1.28 (t,  $J$  = 7.1 Hz, 3H).

**$^{13}\text{C}$  NMR** (75 MHz,  $\text{DMSO}-d_6$ )  $\delta$  161.28, 139.12, 136.14, 132.76, 132.11, 128.16, 127.55, 127.50, 127.32, 126.29, 125.82, 125.59, 125.29, 124.64, 124.52, 122.54, 120.86, 111.32, 110.74, 60.47, 47.36, 14.09.

**HRMS** ( $\text{ESI}^+$ ) calcd. for  $\text{C}_{22}\text{H}_{20}\text{NO}_2$   $[\text{M}+\text{H}]^+$ : 330.1494; found: 330.1483.

*Methyl 1-(naphthalen-2-ylmethyl)-1H-indole-6-carboxylate (3c)*

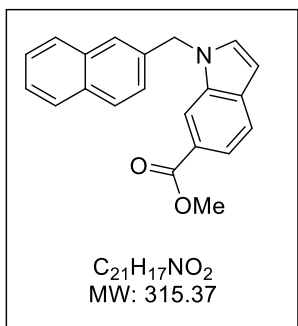

It was prepared from methyl 1H-indole-6-carboxylate (200.00 mg, 1.14 mmol), 2-(bromomethyl)naphthalene (378.80 mg, 1.71 mmol), and NaH (68.50 mg, 1.71 mmol) in DMF (5 ml) in accordance with General procedure 2. The residue was purified by FCC on silica gel (in a hexane/EtOAc mixture at 4:1) thus giving **3c** as a yellowish solid (129.9 mg, 65%): mp 123 °C.

**<sup>1</sup>H NMR** (300 MHz, DMSO-*d*<sub>6</sub>) δ 8.13 (q, *J* = 1.0 Hz, 1H), 7.89–7.85 (m, 2H), 7.81 (dd, *J* = 5.5, 3.2 Hz, 2H), 7.66 (dd, *J* = 3.3, 1.0 Hz, 3H), 7.50–7.46 (m, 2H), 7.32 (dd, *J* = 8.5, 1.8 Hz, 1H), 6.64 (dd, *J* = 3.1, 0.8 Hz, 1H), 5.71 (s, 2H), 3.80 (s, 3H).

**<sup>13</sup>C NMR** (75 MHz, DMSO-*d*<sub>6</sub>) δ 167.04, 135.55, 135.09, 133.13, 132.77, 132.25, 132.06, 128.32, 127.57, 127.54, 126.40, 125.99, 125.15, 124.98, 122.36, 120.41, 119.83, 112.01, 101.60, 51.74, 49.33.

**HRMS** (ESI<sup>+</sup>) calcd. for C<sub>21</sub>H<sub>18</sub>NO<sub>2</sub> [*M*+H]<sup>+</sup>: 316.1338; found: 316.1328.

*Ethyl 1-(naphthalen-1-ylmethyl)-1H-pyrrole-2-carboxylate (5c)*

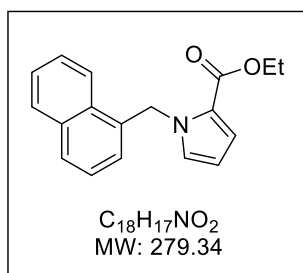

It was prepared from ethyl 1H-pyrrole-2-carboxylate (100.00 mg, 0.72 mmol), 1-(bromomethyl)naphthalene (190.90 mg, 1.08 mmol), and NaH (43.20 mg, 1.08 mmol) in DMF (5 ml) according to General procedure 2. The residue was purified by FCC on silica gel (in a hexane/EtOAc mixture at 94:6) to isolate **5c** as a colorless oil (129.9 mg, 65%).

**<sup>1</sup>H NMR** (300 MHz, DMSO-*d*<sub>6</sub>) δ 8.10 (d, *J* = 7.4 Hz, 1H), 8.00–7.94 (m, 1H), 7.83 (d, *J* = 8.2 Hz, 1H), 7.59 (ddd, *J* = 6.8, 4.5, 1.6 Hz, 2H), 7.41–7.34 (m, 1H), 7.20 (t, *J* = 2.1 Hz, 1H), 7.00 (dd, *J* = 3.9, 1.8 Hz, 1H), 6.49 (d, *J* = 7.1 Hz, 1H), 6.24 (dd, *J* = 3.9, 2.6 Hz, 1H), 6.06 (s, 2H), 4.07 (q, *J* = 7.1 Hz, 2H), 1.11 (t, *J* = 7.1 Hz, 3H).

**<sup>13</sup>C NMR** (75 MHz, DMSO-*d*<sub>6</sub>) δ 160.20, 135.11, 133.01, 130.33, 129.91, 128.53, 127.39, 126.43, 126.01, 125.58, 122.78, 122.40, 121.79, 118.03, 108.44, 59.35, 49.34, 14.09.

**HRMS** (ESI<sup>+</sup>) calcd. for C<sub>18</sub>H<sub>18</sub>NO<sub>2</sub> [*M*+H]<sup>+</sup>: 280.1338; found: 280.1331.

*Ethyl 1-(naphthalen-2-ylmethyl)-1H-pyrrole-2-carboxylate (5d)*

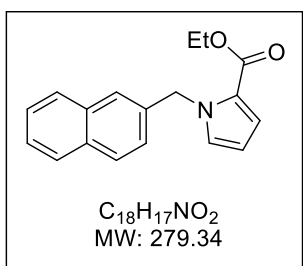

It was prepared from ethyl 1H-pyrrole-2-carboxylate (150.00 mg, 1.09 mmol), 2-(bromomethyl)naphthalene (357.50 mg, 1.62 mmol), and NaH (64.70 mg, 1.62 mmol) in DMF (5 ml) according to General procedure 2. The residue was purified by FCC on silica gel (hexane/EtOAc 94:6) to obtain **5d** as a colorless oil (192.3 mg, 64%).

**<sup>1</sup>H NMR** (300 MHz, Chloroform-*d*) δ 7.82–7.75 (m, 3H), 7.51 (s, 1H), 7.48–7.43 (m, 2H), 7.28 (dd, *J* = 8.5, 1.7 Hz, 1H), 7.06 (dd, *J* = 3.9, 1.8 Hz, 1H), 6.96–6.89 (m, 1H), 6.22 (dd, *J* = 3.9, 2.6 Hz, 1H), 5.73 (s, 2H), 4.24 (q, *J* = 7.1 Hz, 2H), 1.30 (t, *J* = 7.1 Hz, 3H).

**<sup>13</sup>C NMR** (75 MHz, Chloroform-*d*) δ 161.31, 136.00, 133.56, 132.94, 129.09, 128.55, 128.04, 127.80, 126.30, 126.01, 125.75, 125.18, 122.66, 118.47, 108.65, 59.96, 52.35, 14.50.

**HRMS** (ESI<sup>+</sup>) calcd. for C<sub>18</sub>H<sub>18</sub>NO<sub>2</sub> [*M*+H]<sup>+</sup>: 280.1338; found: 280.1331.

*1-(Naphthalen-1-ylmethyl)-1H-indole-2-carboxylic acid (2a)*

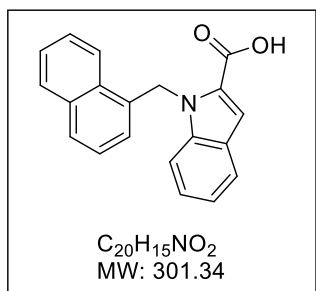

It was synthesized from ethyl 1-(naphthalen-1-ylmethyl)-1H-indole-2-carboxylate (95.00 mg, 0.29 mmol) and NaOH (1.5 M in water, 0.38 ml, 0.57 mmol) in ethanol (5 ml) according to General procedure 3. The precipitate was filtered out, washed with distilled water, and dried under reduced pressure overnight thus affording **2a** as a white solid (256.4 mg, 91%): mp 228 °C.

**<sup>1</sup>H NMR** (400 MHz, DMSO-*d*<sub>6</sub>) δ 12.89 (br.s, 1H), 8.29 (d, *J* = 8.3 Hz, 1H), 7.98 (d, *J* = 7.6 Hz, 1H), 7.77 (dd, *J* = 8.0, 5.2 Hz, 2H), 7.69–7.65 (m, 1H), 7.63–7.59 (m, 1H), 7.45–7.43 (m, 1H), 7.38 (d, *J* = 8.4 Hz, 1H), 7.26–7.21 (m, 2H), 7.18–7.13 (m, 1H), 6.39 (s, 2H), 6.08 (d, *J* = 7.1 Hz, 1H).

**<sup>13</sup>C NMR** (101 MHz, DMSO-*d*<sub>6</sub>) δ 162.66, 139.27, 134.54, 133.10, 129.96, 128.55, 126.99, 126.35, 126.02, 125.62, 125.47, 125.03, 122.98, 122.47, 121.09, 120.75, 111.08, 110.55, 45.22.

**HRMS** (ESI<sup>+</sup>) calcd. for C<sub>20</sub>H<sub>16</sub>NO<sub>2</sub> [M+H]<sup>+</sup>: 302.1181; found: 302.1176. **HRMS** (ESI<sup>-</sup>) calcd. for C<sub>20</sub>H<sub>14</sub>NO<sub>2</sub> [M-H]<sup>-</sup>: 300.1025; found: 300.0997.

*1-(Naphthalen-2-ylmethyl)-1H-indole-2-carboxylic acid (2b)*

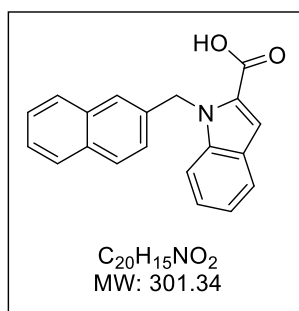

It was prepared from ethyl 1-(naphthalen-2-ylmethyl)-1H-indole-2-carboxylate (35.7 mg, 0.11 mmol) and NaOH (1.5 M in water, 0.10 ml, 0.14 mmol) in ethanol (2 ml) according to General procedure 3. The precipitate was filtered off, washed with distilled water, and dried under reduced pressure overnight thereby giving **2b** as a white solid (20.6 mg, 63%): mp 219 °C.

**<sup>1</sup>H NMR** (300 MHz, DMSO-*d*<sub>6</sub>) δ 12.98 (s, 1H), 7.85–7.80 (m, 2H), 7.77–7.71 (m, 2H), 7.59–7.55 (m, 1H), 7.51 (s, 1H), 7.45 (dd, *J* = 6.2, 3.3 Hz, 2H), 7.37 (d, *J* = 0.8 Hz, 1H), 7.29–7.20 (m, 2H), 7.16–7.10 (m, 1H), 6.05 (s, 2H).

**<sup>13</sup>C NMR** (75 MHz, DMSO-*d*<sub>6</sub>) δ 162.91, 138.99, 136.29, 132.75, 132.08, 128.21, 128.10, 127.50, 127.48, 126.25, 125.77, 125.65, 124.91, 124.69, 124.54, 122.39, 120.64, 111.24, 110.49, 47.15.

**HRMS** (ESI<sup>+</sup>) calcd. for C<sub>20</sub>H<sub>16</sub>NO<sub>2</sub> [M+H]<sup>+</sup>: 302.1181; found: 302.1175. **HRMS** (ESI<sup>-</sup>) calcd. for C<sub>20</sub>H<sub>14</sub>NO<sub>2</sub> [M-H]<sup>-</sup>: 300.1025; found: 300.1022.

*1-(Naphthalen-2-ylmethyl)-1H-indole-6-carboxylic acid (3b)*

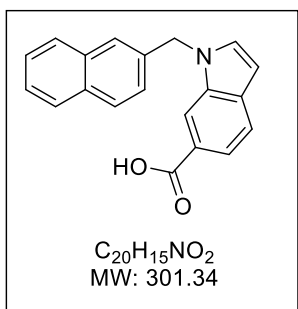

It was prepared from methyl 1-(naphthalen-1-ylmethyl)-1H-indole-6-carboxylate (300.00 mg, 0.95 mmol) and NaOH (1.5 M in water, 1.27 ml, 1.90 mmol) in ethanol (7 ml) in accordance with General procedure 3. The precipitate was filtered out, washed with distilled water, and dried under reduced pressure overnight to obtain **3b** as a white solid (234.5 mg, 82%): mp 208 °C.

**<sup>1</sup>H NMR** (300 MHz, DMSO-*d*<sub>6</sub>) δ 12.52 (s, 1H), 8.10 (q, *J* = 1.1 Hz, 1H), 7.89–7.84 (m, 2H), 7.83–7.77 (m, 2H), 7.69 (s, 1H), 7.65 (d, *J* = 0.9 Hz, 2H), 7.50–7.46 (m, 2H), 7.32 (dd, *J* = 8.5, 1.7 Hz, 1H), 6.63 (dd, *J* = 3.1, 0.8 Hz, 1H), 5.70 (s, 2H).

**$^{13}\text{C}$  NMR** (75 MHz,  $\text{DMSO-}d_6$ )  $\delta$  168.14, 135.62, 135.13, 132.81, 132.26, 131.83, 128.31, 127.58, 127.56, 126.40, 125.99, 125.18, 125.01, 123.51, 120.17, 120.13, 112.13, 101.48, 49.37.

**HRMS** ( $\text{ESI}^+$ ) calcd. for  $\text{C}_{20}\text{H}_{16}\text{NO}_2$   $[\text{M}+\text{H}]^+$ : 302.1181; found: 302.1171. **HRMS** ( $\text{ESI}^-$ ) calcd. for  $\text{C}_{20}\text{H}_{14}\text{NO}_2$   $[\text{M}-\text{H}]^-$ : 300.1025; found: 300.1013.

*1-(Naphthalen-1-ylmethyl)-1H-pyrrole-2-carboxylic acid (5a)*

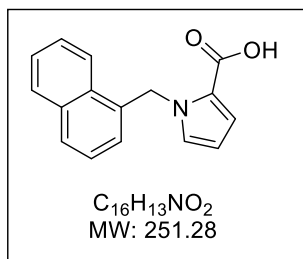

It was prepared from ethyl 1-(naphthalen-1-ylmethyl)-1H-pyrrole-2-carboxylate (108.90 mg, 0.39 mmol) and NaOH (1.5 M in water, 0.34 ml, 0.51 mmol) in ethanol (5 ml) according to General procedure 3. The precipitate was filtered off, washed with distilled water, and dried under reduced pressure overnight to obtain **5a** as white solid (61.2 mg, 61%): mp 160 °C.

**$^1\text{H}$  NMR** (300 MHz,  $\text{DMSO-}d_6$ )  $\delta$  12.14 (br.s, 1H), 8.10 (d,  $J = 7.5$  Hz, 1H), 7.99–7.94 (m, 1H), 7.83 (d,  $J = 8.2$  Hz, 1H), 7.62–7.54 (m, 2H), 7.39 (t,  $J = 7.7$  Hz, 1H), 7.12 (s, 1H), 6.96 (s, 1H), 6.54 (d,  $J = 7.0$  Hz, 1H), 6.20 (s, 1H), 6.08 (s, 2H).

**$^{13}\text{C}$  NMR** (75 MHz,  $\text{DMSO-}d_6$ )  $\delta$  161.84, 135.28, 133.02, 130.01, 129.74, 128.53, 127.38, 126.41, 125.98, 125.61, 122.88, 122.69, 117.88, 108.19, 49.09.

**HRMS** ( $\text{ESI}^+$ ) calcd. for  $\text{C}_{16}\text{H}_{14}\text{NO}_2$   $[\text{M}+\text{H}]^+$ : 252.1025; found: 252.1018. **HRMS** ( $\text{ESI}^-$ ) calcd. for  $\text{C}_{16}\text{H}_{12}\text{NO}_2$   $[\text{M}-\text{H}]^-$ : 250.0868; found: 250.0830.

*1-(Naphthalen-2-ylmethyl)-1H-pyrrole-2-carboxylic acid (5b)*

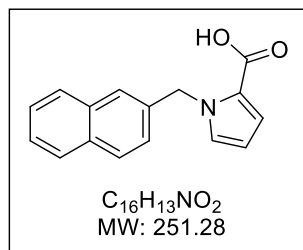

It was synthesized from ethyl 1-(naphthalen-2-ylmethyl)-1H-pyrrole-2-carboxylate (170.00 mg, 0.61 mmol) and NaOH (1.5 M in water, 0.65 ml, 0.97 mmol) in ethanol (5 ml) by General procedure 3. The precipitate was filtered off, washed with distilled water, and dried under reduced pressure overnight to obtain **5b** as a white solid (128.00 mg, 82%): mp 160 °C.

**$^1\text{H}$  NMR** (300 MHz,  $\text{DMSO-}d_6$ )  $\delta$  12.15 (br.s, 1H), 7.86 (dd,  $J = 8.9, 4.1$  Hz, 2H), 7.82–7.78 (m, 1H), 7.52 (s, 1H), 7.50–7.46 (m, 2H), 7.31–7.26 (m, 2H), 6.90 (dd,  $J = 3.9, 1.8$  Hz, 1H), 6.18 (dd,  $J = 3.9, 2.6$  Hz, 1H), 5.73 (s, 2H).

**$^{13}\text{C}$  NMR** (75 MHz,  $\text{DMSO-}d_6$ )  $\delta$  161.83, 136.79, 132.79, 132.15, 129.61, 127.98, 127.56, 127.50, 126.26, 125.83, 125.04, 124.92, 122.10, 117.96, 108.11, 51.02.

**HRMS** ( $\text{ESI}^+$ ) calcd. for  $\text{C}_{16}\text{H}_{14}\text{NO}_2$   $[\text{M}+\text{H}]^+$ : 252.1025; found: 252.1019. **HRMS** ( $\text{ESI}^-$ ) calcd. for  $\text{C}_{16}\text{H}_{12}\text{NO}_2$   $[\text{M}-\text{H}]^-$ : 250.0868; found: 250.0836.

**Table S1.** Results of biochemical assay of bCSE and hCSE

| Compound   | IC <sub>50</sub> * biochemical assay |                  |
|------------|--------------------------------------|------------------|
|            | bCSE, $\mu$ M                        | hCSE, $\mu$ M    |
| <b>1a</b>  | >500                                 | >500             |
| <b>1b</b>  | >500                                 | >500             |
| <b>1c</b>  | >500                                 | >500             |
| <b>2a</b>  | 64.6 $\pm$ 3.1                       | 251.5 $\pm$ 16.6 |
| <b>2b</b>  | 71.1 $\pm$ 4.2                       | 284.8 $\pm$ 14.6 |
| <b>3a</b>  | 79.3 $\pm$ 5.9                       | 471.9 $\pm$ 37.3 |
| <b>3b</b>  | 148.1 $\pm$ 46.4                     | >500             |
| <b>4a</b>  | 138.2 $\pm$ 9.0                      | >500             |
| <b>4b</b>  | 109.8 $\pm$ 11.7                     | >500             |
| <b>5a</b>  | 289.3 $\pm$ 30.4                     | >500             |
| <b>5b</b>  | >500                                 | >500             |
| <b>NL2</b> | 143.7 $\pm$ 9.0                      | >500             |
| <b>PAG</b> | 24.3 $\pm$ 0.7                       | 0.17 $\pm$ 0.02  |

\*Data are the mean  $\pm$  SD of at least three independent measurements.

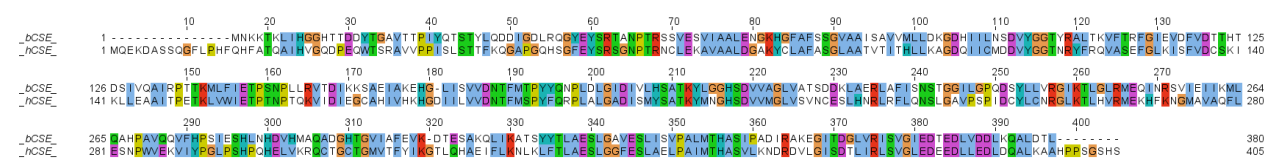

**Figure S1.** An alignment of amino acid sequences of bCSE (A0A2Y2FJW5) and hCSE (P32929) using Clustal Omega at EMBL-EBI [23].

**Table S2.** Susceptibility of the investigated isolates to the main antimicrobial agents.

| Isolate                                         | Sensitive to | Resistant to                                                                                                                                                                                                                                                                                            |
|-------------------------------------------------|--------------|---------------------------------------------------------------------------------------------------------------------------------------------------------------------------------------------------------------------------------------------------------------------------------------------------------|
| <i>A. baumannii</i><br>GIMC5509:ABT-52Ts19      | Polymyxin    | Aztreonam, amikacin, ampicide (ampicillin + sulbactam), vancomycin, gentamicin, zavicefta (ceftazidim + avibactam), maxicam (cefepim + sulbactam), meropenem, moxifloxacin, ofloxacin, sulperazone (cefoperazone + sulbactam), tigecycline, cefepime, ceftazidime, ciprofloxacin, fosfomycin, ertapenem |
| <i>P. aeruginosa</i><br>GIMC5016:PA1840/36/2015 | Colistin     | Amikacin, gentamicin, imipenem, pilastatin levofloxacin meropenem, piperacillin, tobramycin, cefazolin, cefepime, cefoperazone/, sulbactam, cefotaxime, ceftazidime, ceftriaxone, ciprofloxacin                                                                                                         |

**Table S3.** Results of the microbiological assay of potentiating activity in combination with antibiotics against *S. aureus* ATCC 25923 and *S. aureus* INA00761 (MRSA)

| Bacterial strain | <i>S. aureus</i> ATCC 25923 |             |             | <i>S. aureus</i> INA00761 |            |           |
|------------------|-----------------------------|-------------|-------------|---------------------------|------------|-----------|
| Antibiotic       | km                          | amp         | nor         | km                        | amp        | nor       |
| MIC (µg/ml)      | 12.5                        | 0.3         | 2.5         | res*                      | res        | 10        |
| Range (µg/ml)    | 50-0.4                      | 1.25-0.01   | 10-0.08     | 100-0.8                   | 100-0.8    | 40-0.3    |
| 1a               | 12.5                        | 0.3         | 1.25        | res                       | res        | 10        |
| 1b               | 1.5                         | 0.3         | 1.25        | res                       | res        | 10        |
| 1c               | 12.5                        | 0.3         | 2.5         | res                       | res        | 10        |
| <b>2a</b>        | <b>0.3</b>                  | <b>0.07</b> | <b>0.08</b> | <b>res</b>                | <b>0.8</b> | <b>10</b> |
| 2b               | 0.4                         | 0.15        | 0.3         | res                       | res        | 10        |
| 3a               | 1.5                         | 0.3         | 0.6         | res                       | res        | 10        |
| 3b               | 1.5                         | 0.3         | 0.8         | res                       | res        | 10        |
| 4a               | 1.5                         | 0.3         | 1.25        | res                       | res        | 10        |
| 4b               | 0.7                         | 0.3         | 0.3         | res                       | res        | 10        |
| 5a               | 3                           | 0.3         | 1.25        | res                       | res        | 10        |
| 5b               | 3                           | 0.3         | 2.5         | res                       | res        | 10        |
| NL2              | 0.7                         | 0.02        | 0.07        | 0.7                       | 0.8        | 0.3       |

\*resistant to any tested concentrations of the antibiotic below the maximum of tested concentrations.

**Table S4.** Results of the microbiological assay of potentiating activity in combination with antibiotics against clinical isolates of *A. baumannii* and *P. aeruginosa*.

| Clinical isolates                            | MIC (µg/ml) |      | <b>2a</b> | <b>NL2</b> |
|----------------------------------------------|-------------|------|-----------|------------|
| <i>A. baumannii</i> GIMC5509:ABT-52Ts19      | Cefepim     | >512 | 256       | 128        |
|                                              | Gentamicin  | >512 | >512      | >512       |
|                                              | Meropenem   | 64   | 32        | 32         |
|                                              | Tacillin    | 256  | 64        | 128        |
| <i>P. aeruginosa</i> GIMC5016:PA1840/36/2015 | Cefepim     | 256  | 32        | 64         |
|                                              | Gentamicin  | >512 | >512      | >512       |
|                                              | Meropenem   | 16   | 8         | 8          |
|                                              | Tacillin    | 64   | 32        | 32         |

**Table S5.** Solubility in 100 mM phosphate buffer pH 7.4

| Compound          | Solubility (µM) | Comment                            |
|-------------------|-----------------|------------------------------------|
| Nicardipine       | 5.16±0.23       | Negative control (low solubility)  |
| Diclofenac sodium | >100            | Positive control (high solubility) |
| <b>2a</b>         | >100            | -                                  |

Data are shown as mean ± SD (n = 3)

**Table S6.** Stability in human plasma

| Compound      | % Remaining at 4 h | Comment                              |
|---------------|--------------------|--------------------------------------|
| Propantheline | 0.21±0.04          | Negative control (unstable compound) |
| Verapamil     | 103.70±8.29        | Positive control (stable compound)   |
| <b>2a</b>     | 97.58±7.95         | -                                    |

Data are shown as mean ± SD (n = 3)

**Table S7.** Stability in SGF and SIF

| Compound   | % Remaining at 2 h |              | Comment                               |
|------------|--------------------|--------------|---------------------------------------|
|            | SGF                | SIF          |                                       |
| Omeprazole | < 0.1              | 90.45±10.04  | Negative control (unstable at low pH) |
| Verapamil  | 114.47±4.70        | 86.23±5.57   | Positive control (stable compound)    |
| <b>2a</b>  | 91.88±2.68         | 104.07±14.23 | -                                     |

Data are shown as mean ± SD (n = 3)

**Table S8.** LogD<sub>7.4</sub>

| Compound     | Measured logD <sub>7.4</sub> | Predicted ACD/Labs logD <sub>7.4</sub> | Comment                                    |
|--------------|------------------------------|----------------------------------------|--------------------------------------------|
| Paracetamol  | 0.29±0.02                    | 0.40                                   | Negative control (logD <sub>7.4</sub> < 1) |
| Ketoconazole | 3.81±0.20                    | 3.54                                   | Positive control (logD <sub>7.4</sub> > 3) |
| <b>2a</b>    | 2.14±0.14                    | 1.83                                   | -                                          |

Data are shown as mean ± SD (n = 3)

**Table S9.** Caco-2 cell permeability

| Compound    | P <sub>app</sub> A to B (10 <sup>-6</sup> cm/s) | P <sub>app</sub> B to A (10 <sup>-6</sup> cm/s) | Efflux ratio | Comment                                     |
|-------------|-------------------------------------------------|-------------------------------------------------|--------------|---------------------------------------------|
| Atenolol    | 1.4±0.1                                         | 0.7±0.1                                         | 0.54         | Negative control (low penetration ability)  |
| Propranolol | 30.2±2.9                                        | 31.6±1.1                                        | 1.04         | Positive control (high penetration ability) |
| <b>2a</b>   | 43.3±2.8                                        | 49.1±6.0                                        | 1.13         | -                                           |

Data are shown as mean ± SD (n = 2)

**Table S10.** Metabolic stability in rat liver microsomes

| Compound      | Cofactor | CL <sub>int</sub> (μl/min/mg) | t <sub>1/2</sub> (min) | Comment                                                                                |
|---------------|----------|-------------------------------|------------------------|----------------------------------------------------------------------------------------|
| Verapamil     | NADPH    | 70.20±0.52                    | 19.75±0.15             | Positive control (metabolized by CYP450)                                               |
| Umbelliferone | NADPH    | 8.81±1.00                     | 158.43±18.05           | Negative control (metabolized by UGTs (uridine 5'-diphospho-glucuronosyltransferases)) |
| <b>2a</b>     | NADPH    | 29.22±0.29                    | 47.44±0.47             | -                                                                                      |
| Verapamil     | UDPGA    | <3                            | >500                   | Negative control (metabolized by CYP450)                                               |
| Umbelliferone | UDPGA    | 180.02±0.70                   | 7.70±0.03              | Positive control (metabolized by UGTs)                                                 |
| <b>2a</b>     | UDPGA    | 9.20±1.05                     | 151.70±17.27           | -                                                                                      |

Data are shown as mean ± SD (n = 2)



**Table S11.** Plasma protein binding

| Compound    | Fraction bound $f_b$ (%) | Comment                         |
|-------------|--------------------------|---------------------------------|
| Atenolol    | <5                       | Negative control (low binding)  |
| Propranolol | 85.81±2.42               | Positive control (high binding) |
| <b>2a</b>   | >99                      | -                               |

Data are shown as mean  $\pm$  SD (n = 2)

**Table S12.** HEK293 cytotoxicity assays.

| Compound    | CC50, $\mu$ M      | Comment                          |
|-------------|--------------------|----------------------------------|
| Doxorubicin | 1.30 $\pm$ 0.71    | Positive control (high toxicity) |
| <b>1a</b>   | 432.00 $\pm$ 37.51 | -                                |
| <b>1b</b>   | 422.90 $\pm$ 71.78 | -                                |
| <b>1c</b>   | 307.60 $\pm$ 75.50 | -                                |
| <b>2a</b>   | 291.00 $\pm$ 8.11  | -                                |
| <b>2b</b>   | 367.80 $\pm$ 32.83 | -                                |
| <b>3a</b>   | 452.30 $\pm$ 21.51 | -                                |
| <b>3b</b>   | 528.20 $\pm$ 47.10 | -                                |
| <b>4a</b>   | 392.20 $\pm$ 21.84 | -                                |
| <b>4b</b>   | 216.90 $\pm$ 93.20 | -                                |
| <b>5a</b>   | 459.90 $\pm$ 51.08 | -                                |
| <b>5b</b>   | 847.80 $\pm$ 72.15 | -                                |

Data are shown as mean  $\pm$  SD (n = 3)

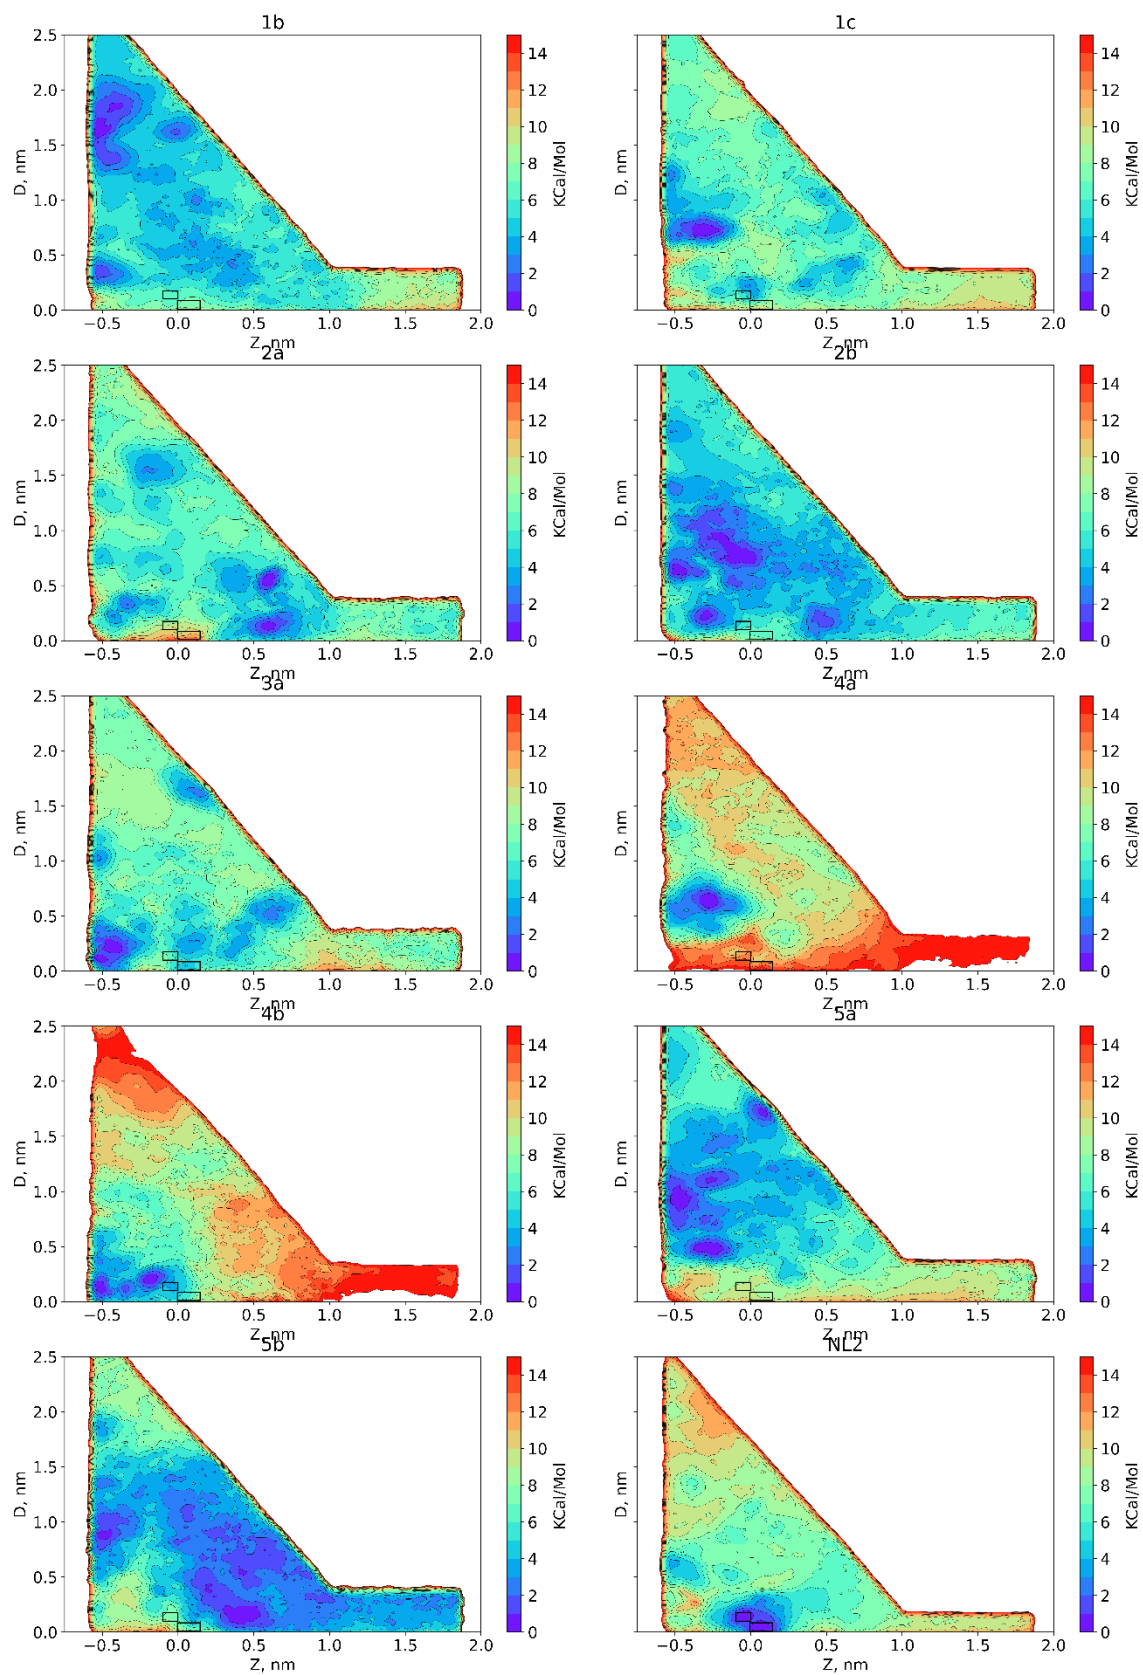

**Figure S2.** Potential energy surfaces obtained for compounds 1-5 from funnel metadynamics simulation data.

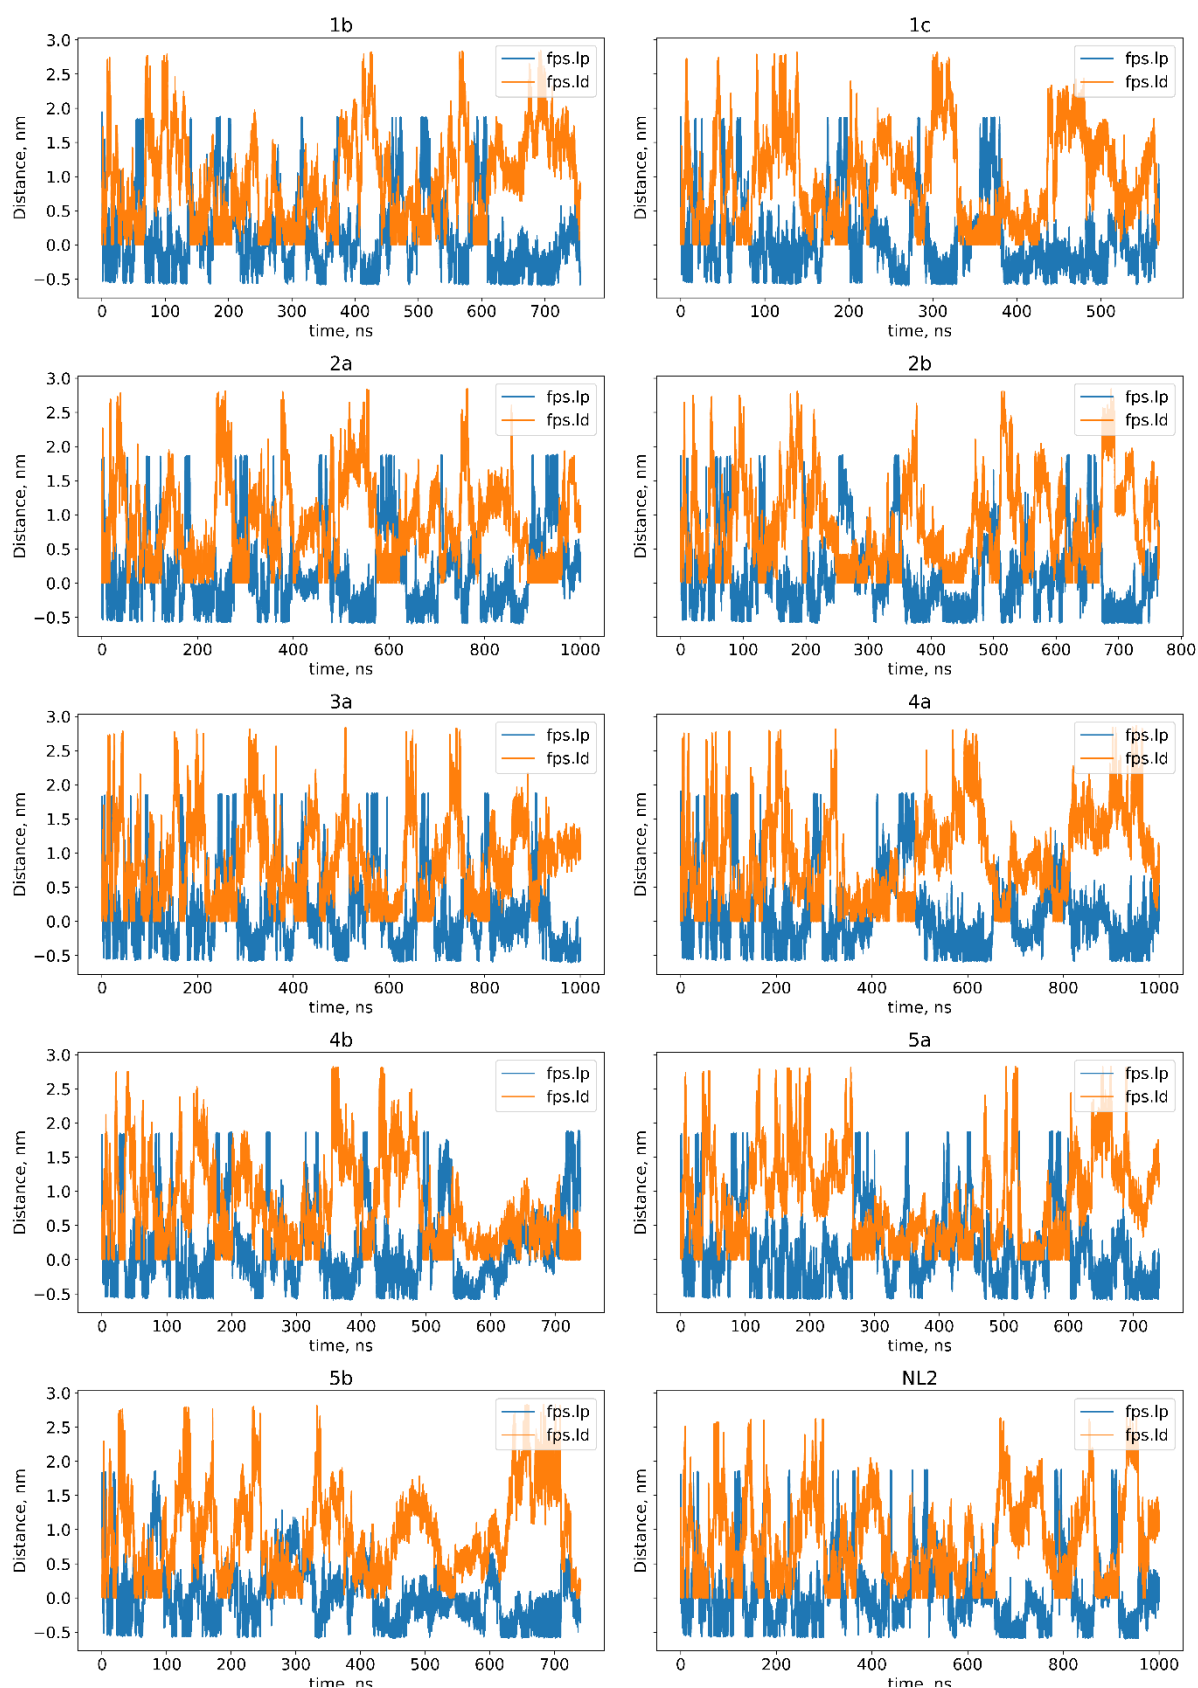

**Figure S3.** Dependence of the values of collective variables during the simulation of funnel metadynamics for compounds **1-5**. One change in fps.lp (the distance between COM NL2 in the binding site of X-ray structure and the point solution 20 Å far from NL2 position) from 0 to 2 nm reflects one act of dissociation and from 2 to 0 is binding event.

**Table S13.** Results of first stage docking calculations of molecules **1a-5a**, **1b-5b**, **1c**. Highlighting (according to enzymatic assays): green - most potent compounds inhibiting bCSE, yellow – medium active, orange – poorly active.

| Compound | GlideScore, kcal/mol (monomer) | IC50 (uM) |
|----------|--------------------------------|-----------|
| NL2      | -5.0                           | 144       |
| 1a       | -6.2                           | >500      |
| 2a       | -4.2                           | 65        |
| 3a       | -5.7                           | 79        |
| 4a       | -5.8                           | 138       |
| 5a       | -5.2                           | 289       |
| 1b       | -6.3                           | >500      |
| 2b       | -4.7                           | 71        |
| 3b       | -6.3                           | 141       |
| 4b       | -6.6                           | 110       |
| 5b       | -5.3                           | >500      |
| 1c       | -6.1                           | >500      |

**Table S14.** Results of docking at two active sites, identified after MD simulations, in tetrameric bCSE. Highlighting: red – poorly active compounds, yellow – moderate activity, green – most potent molecules. Scoring function values are in correlation with the enzymatic activity.

| Compound | GlideScore <sub>1</sub> (kcal/mol) | GlideScore <sub>2</sub> (kcal/mol) | IC50 (uM) |
|----------|------------------------------------|------------------------------------|-----------|
| NL-2     | -6.3                               | -7.3                               | 144       |
| 1a       | -4.7                               | -4.9                               | >500      |
| 2a       | -6.6                               | -6.3                               | 65        |
| 3a       | -6.1                               | -6.4                               | 79        |
| 4a       | -6.3                               | -6.5                               | 138       |
| 5a       | -5.9                               | -6.0                               | 289       |
| 1b       | -5.3                               | -4.8                               | >500      |
| 2b       | -6.0                               | -6.0                               | 71        |
| 3b       | -6.1                               | -6.7                               | 141       |
| 4b       | -6.8                               | -8.1                               | 110       |
| 5b       | -5.9                               | -5.3                               | >500      |
| 1c       | -5.2                               | -5.5                               | >500      |

**Table S15.** Total MMGBSA  $\Delta G$  energy for protein-ligand complexes in two sites of bCSE

| Compound | $\Delta G_1$ (kcal/mol) | $\Delta G_2$ (kcal/mol) | IC50 (uM) |
|----------|-------------------------|-------------------------|-----------|
| 2a       | -42.77                  | -41.21                  | 65        |
| 3a       | -40.36                  | -39.51                  | 79        |
| 4a       | -38.60                  | -43.11                  | 138       |
| 5a       | -30.43                  | -29.71                  | 289       |
| 2b       | -41.34                  | -37.90                  | 71        |
| 3b       | -57.84                  | -46.13                  | 141       |
| 4b       | -41.33                  | -55.51                  | 110       |
| 5b       | -38.28                  | -30.98                  | >500      |

**1-(naphthalen-1-ylmethyl)-1H-indole-3-carboxylic acid (1a)**

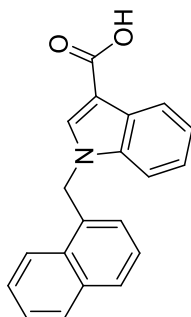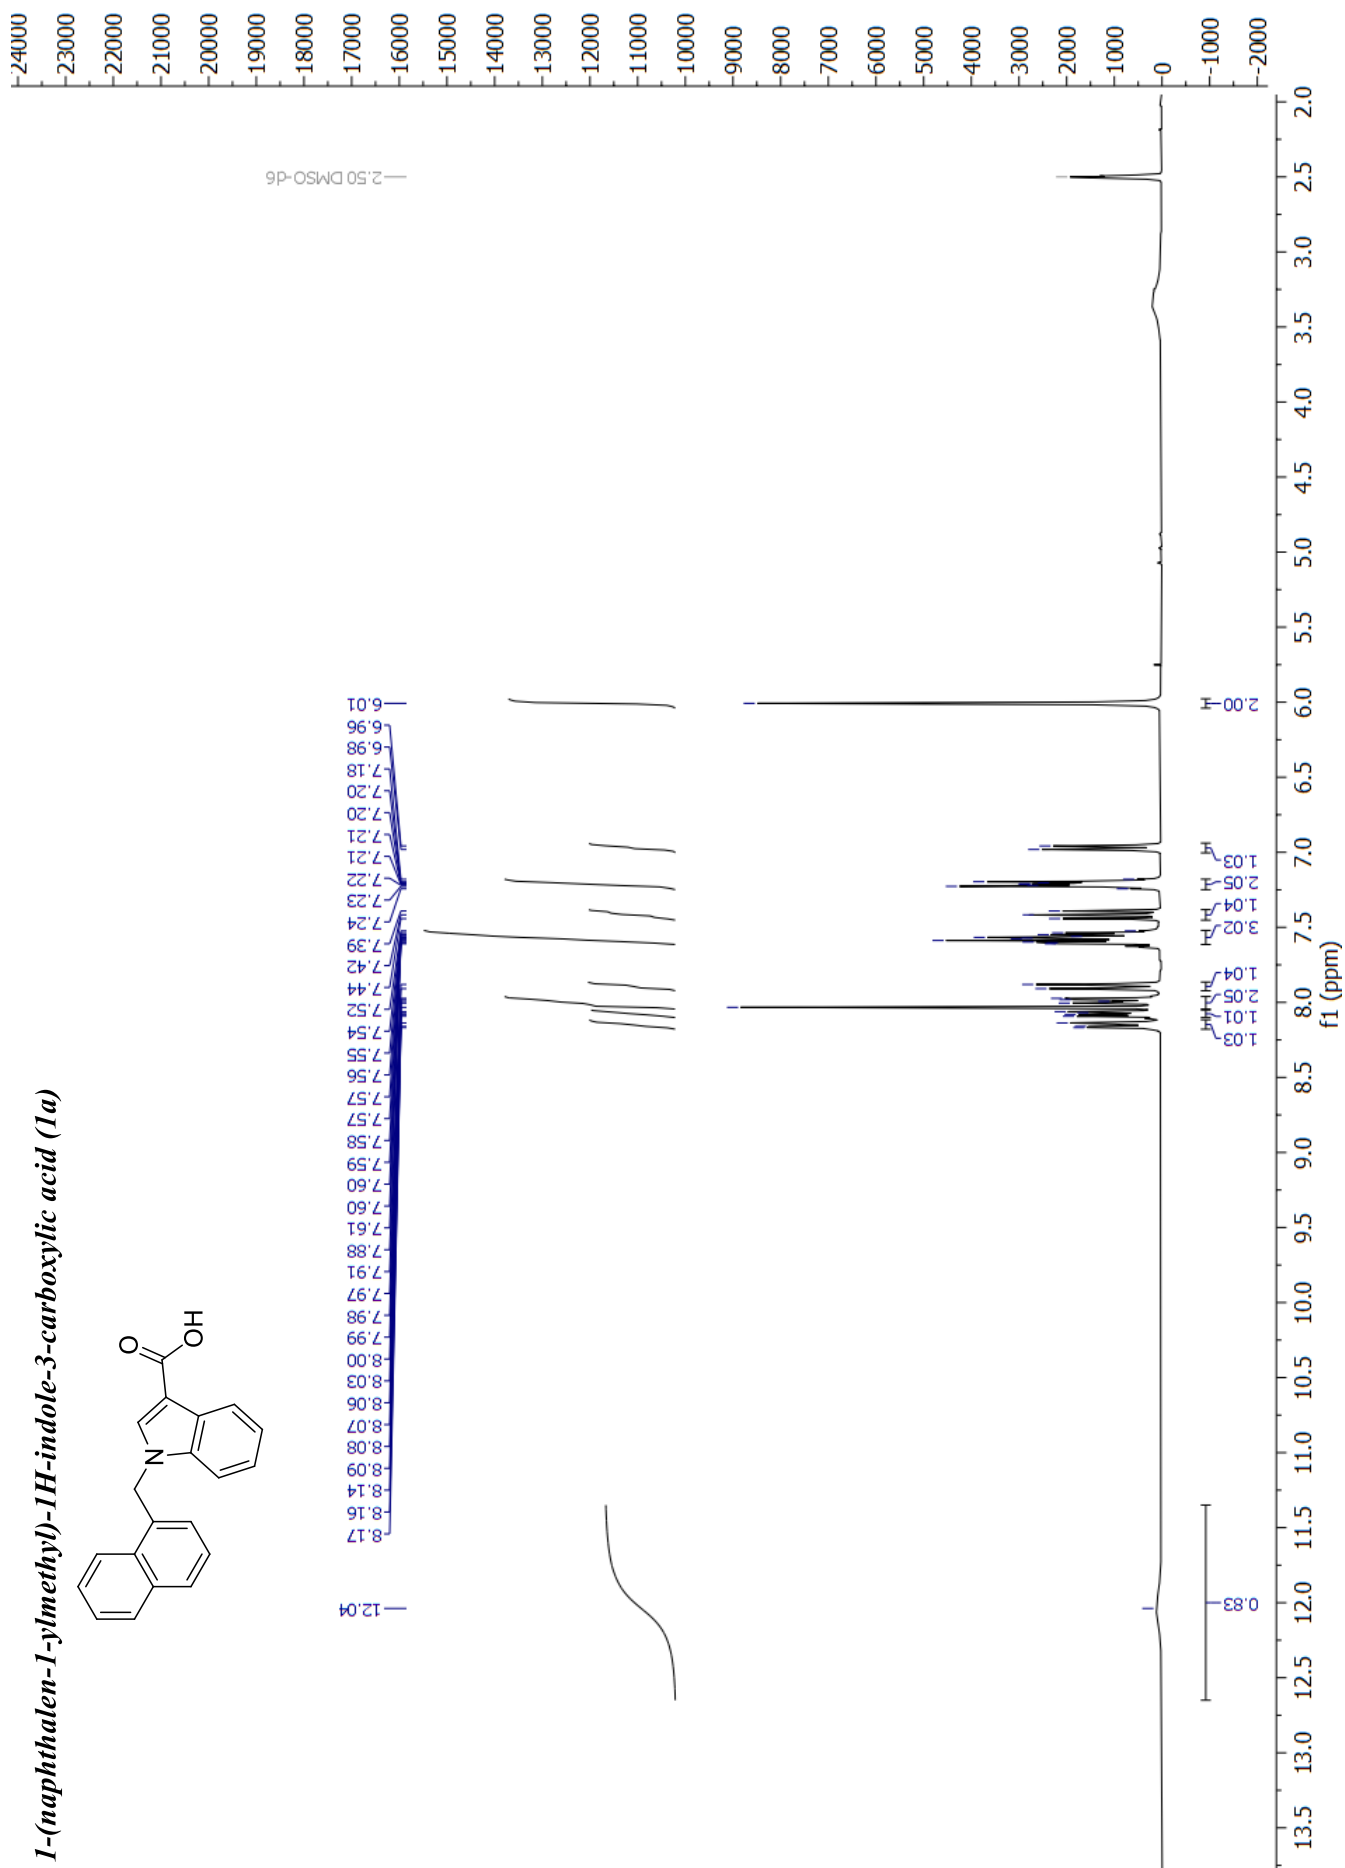

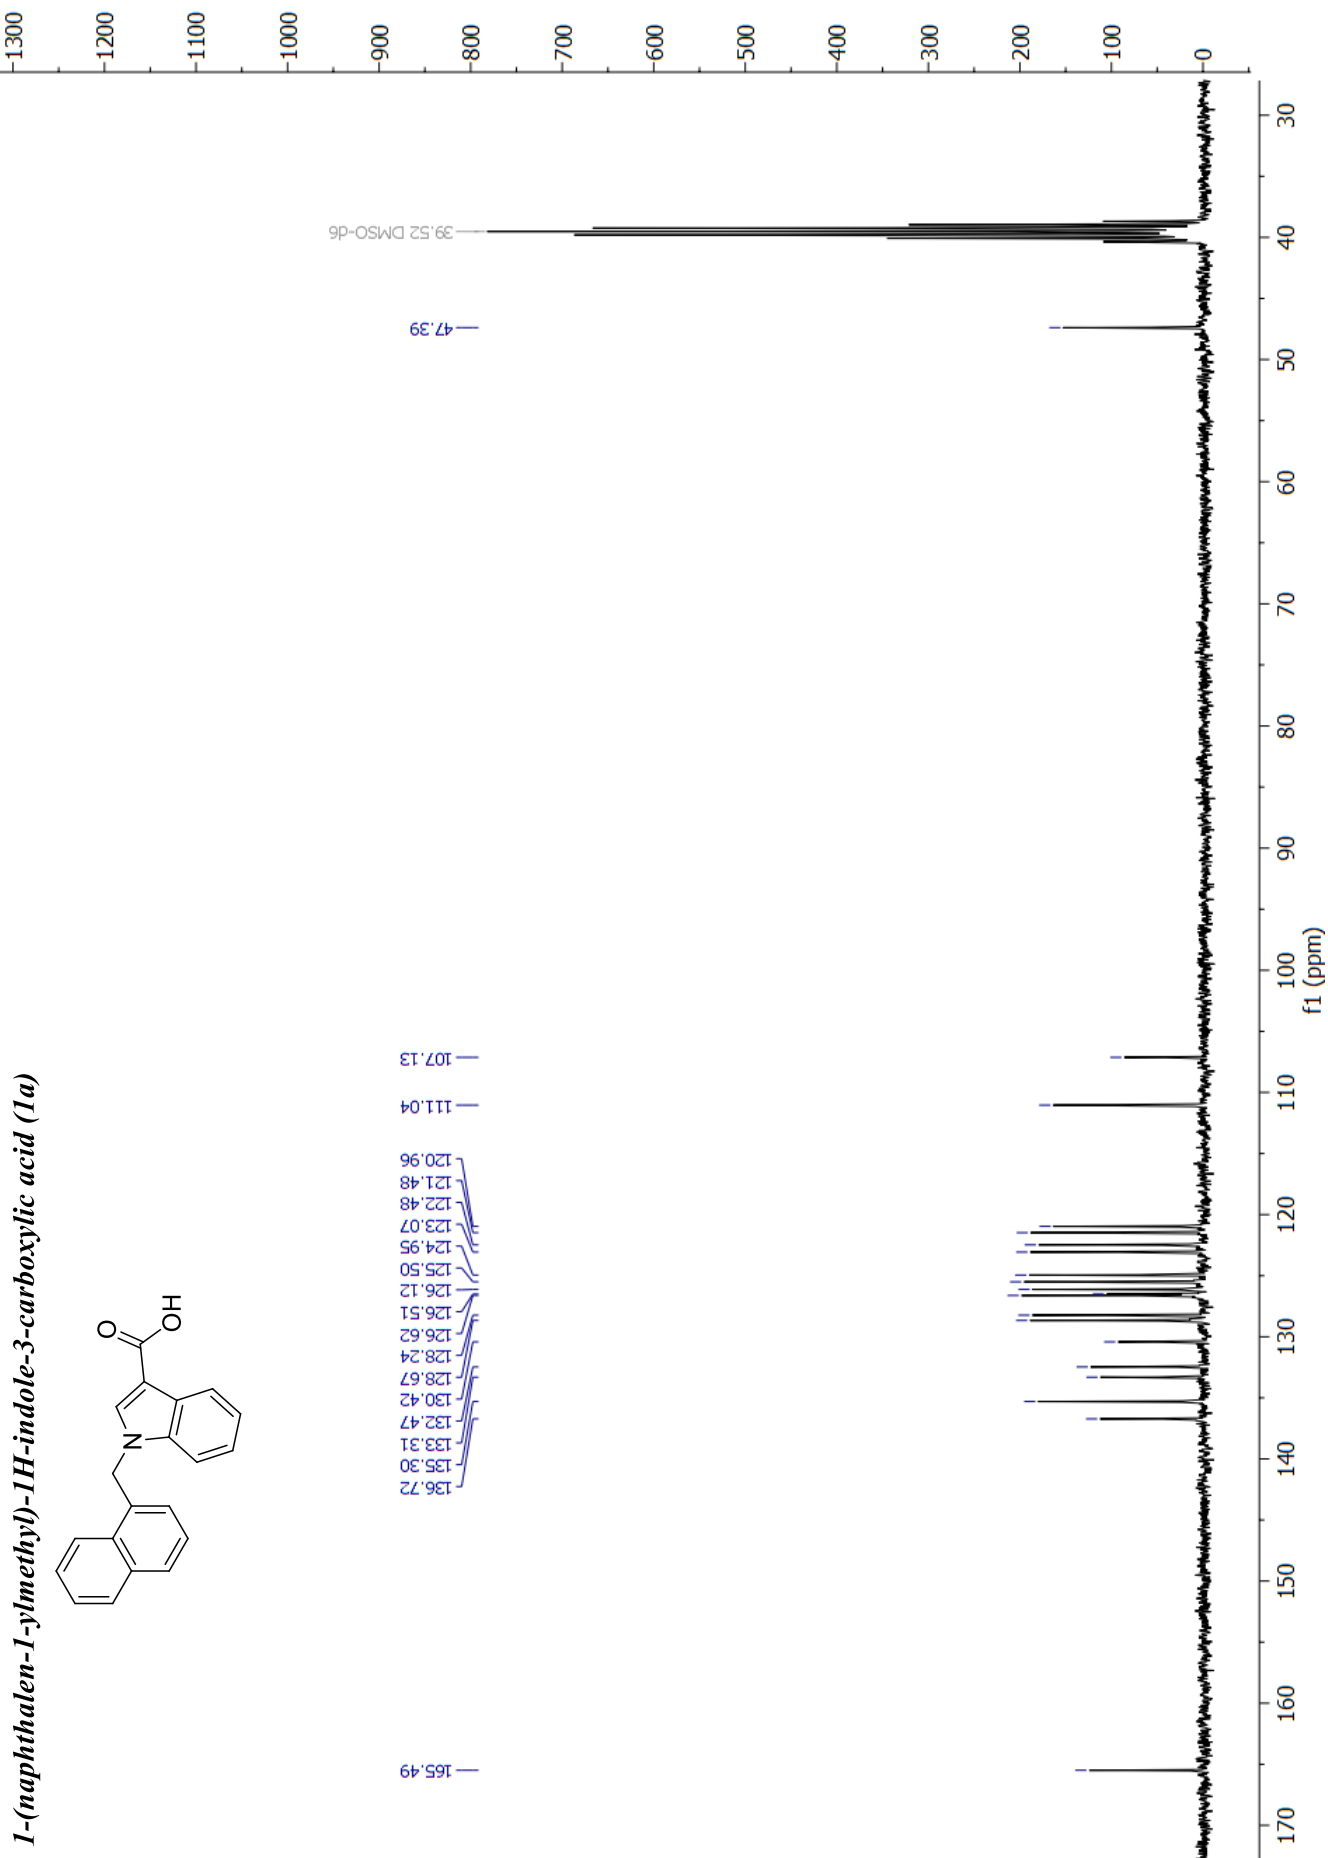

*1-(naphthalen-2-ylmethyl)-1H-indole-3-carboxylic acid (1b)*

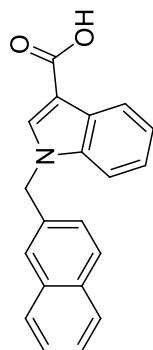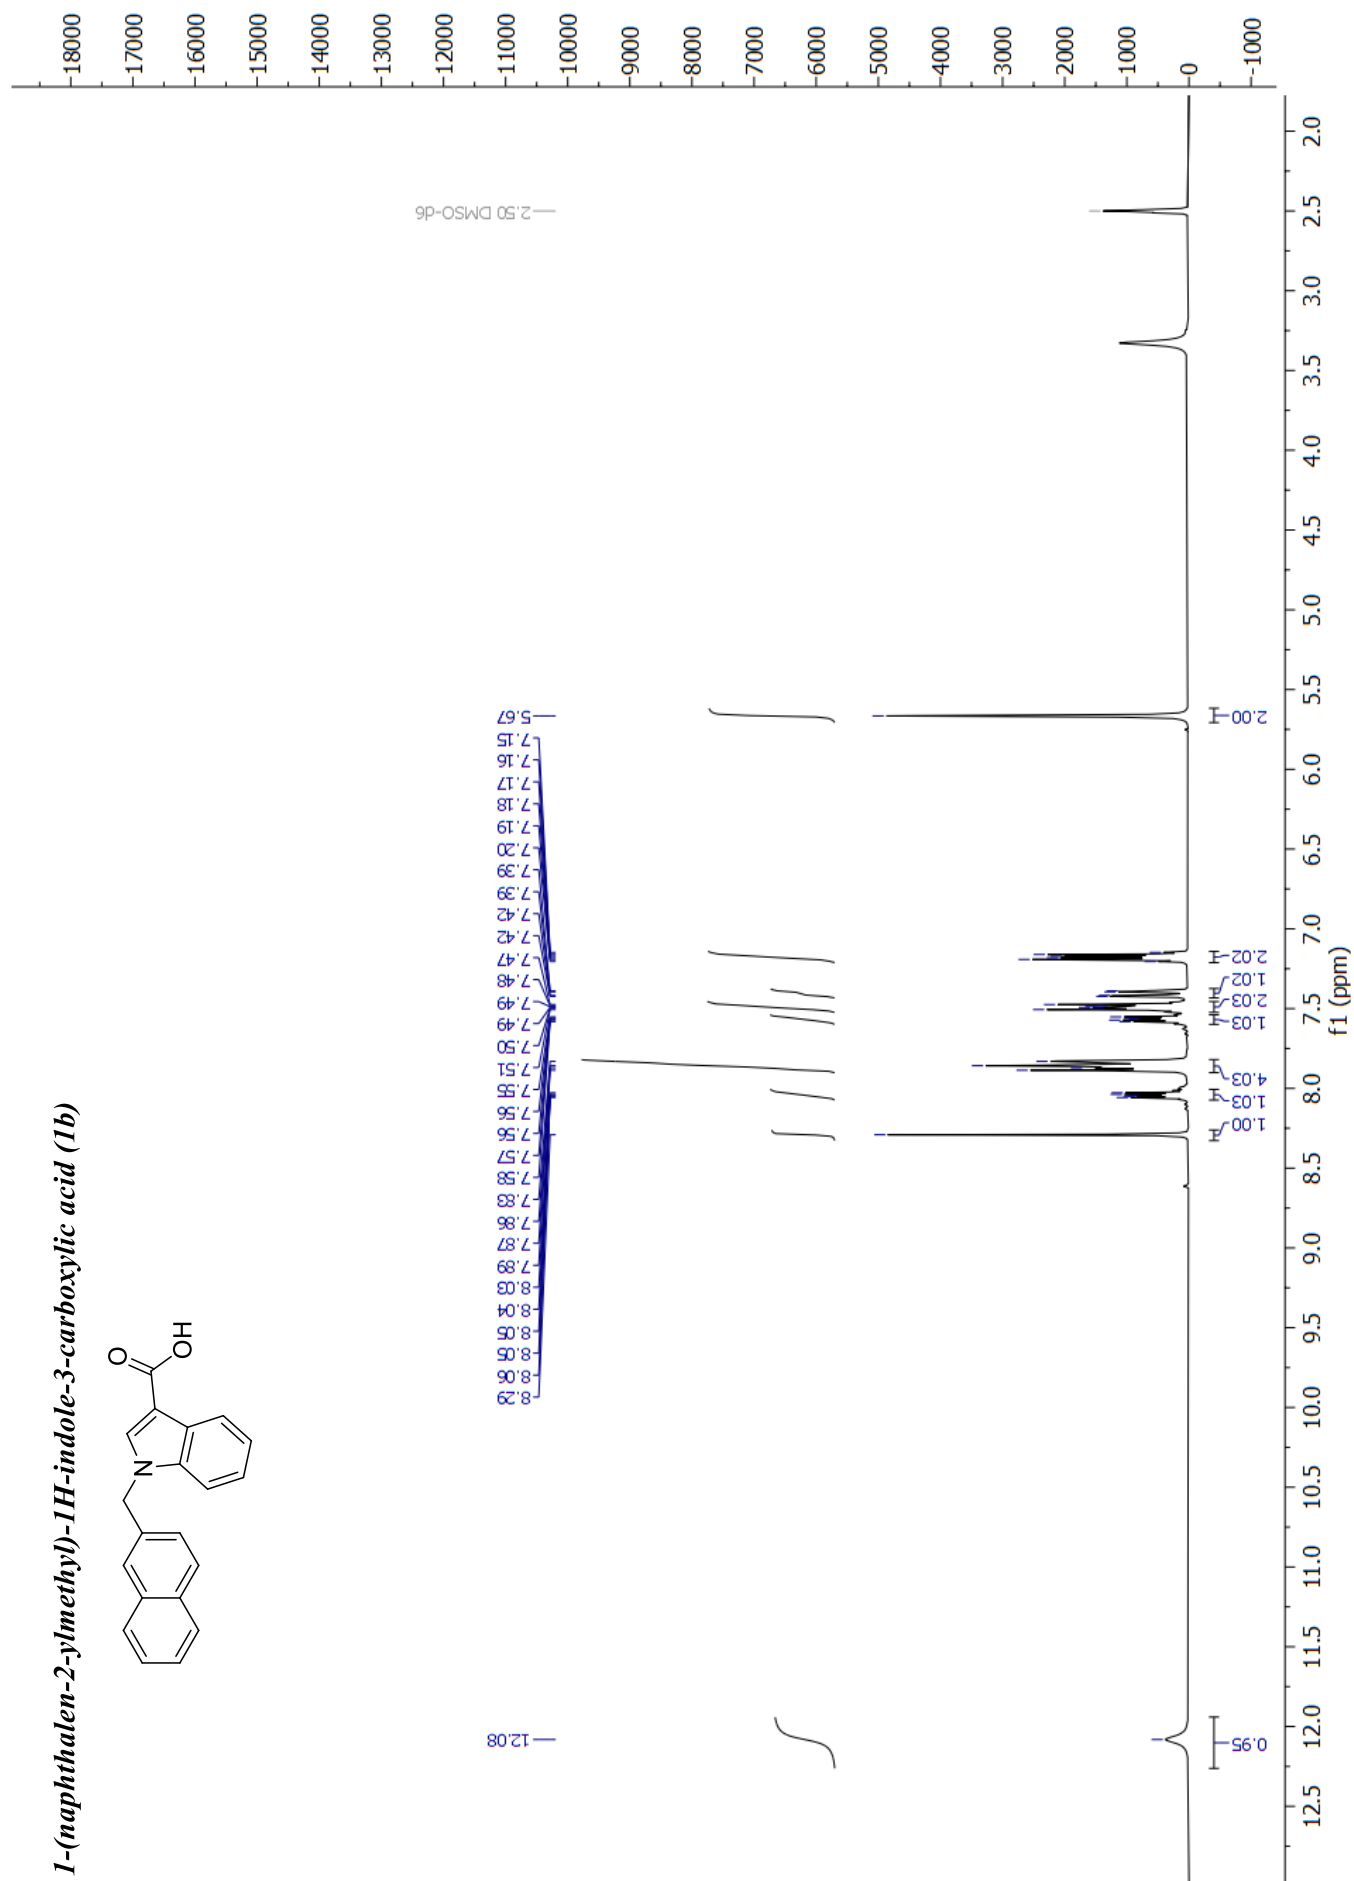

**1-(naphthalen-2-ylmethyl)-1H-indole-3-carboxylic acid (1b)**

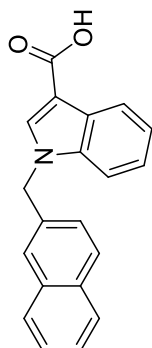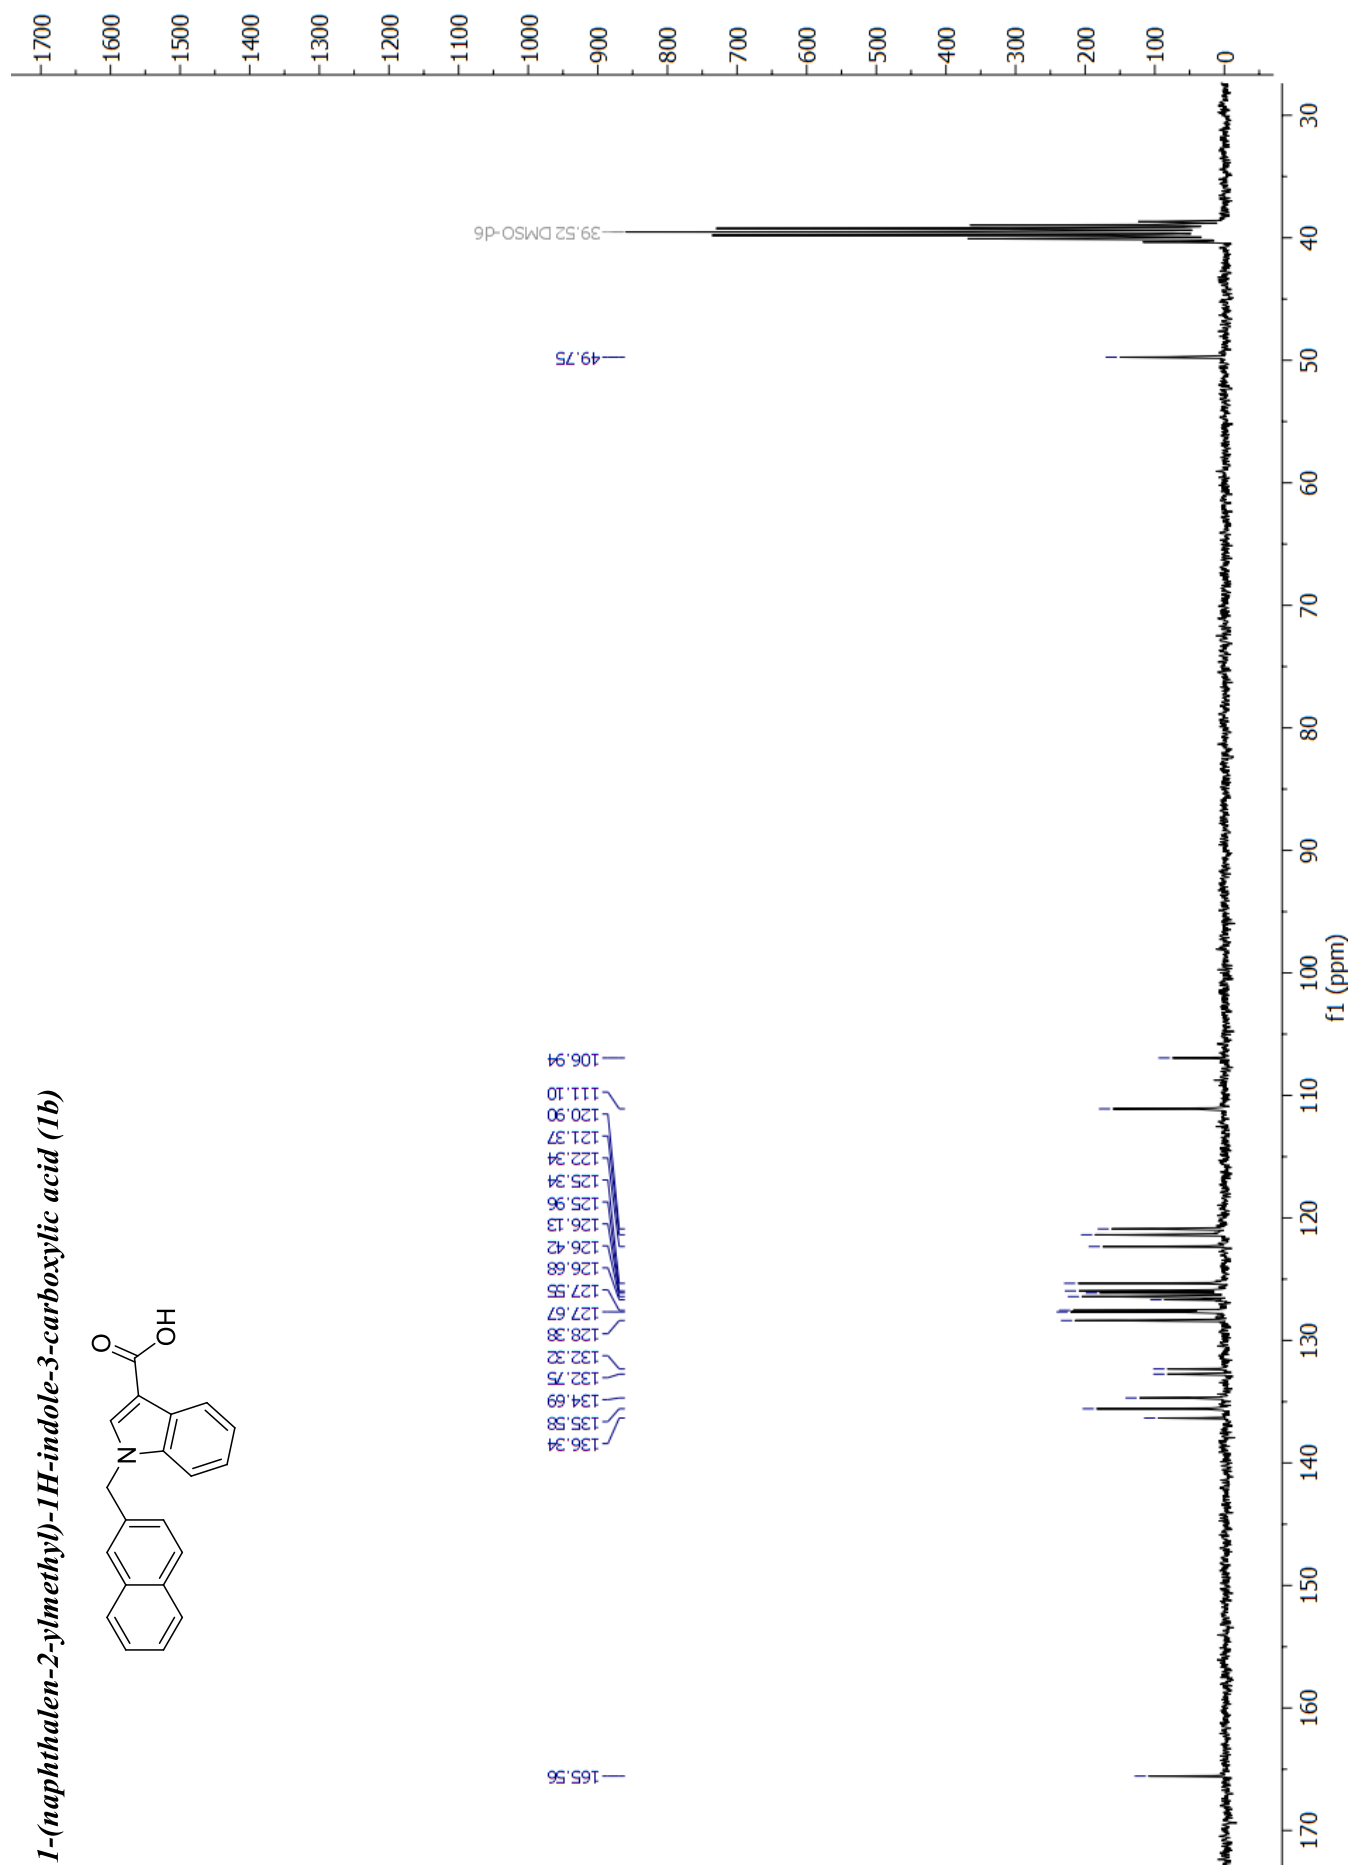



**Sodium 1-(naphthalen-1-ylmethyl)-1H-indole-3-carboxylate (1c)**

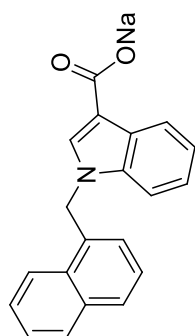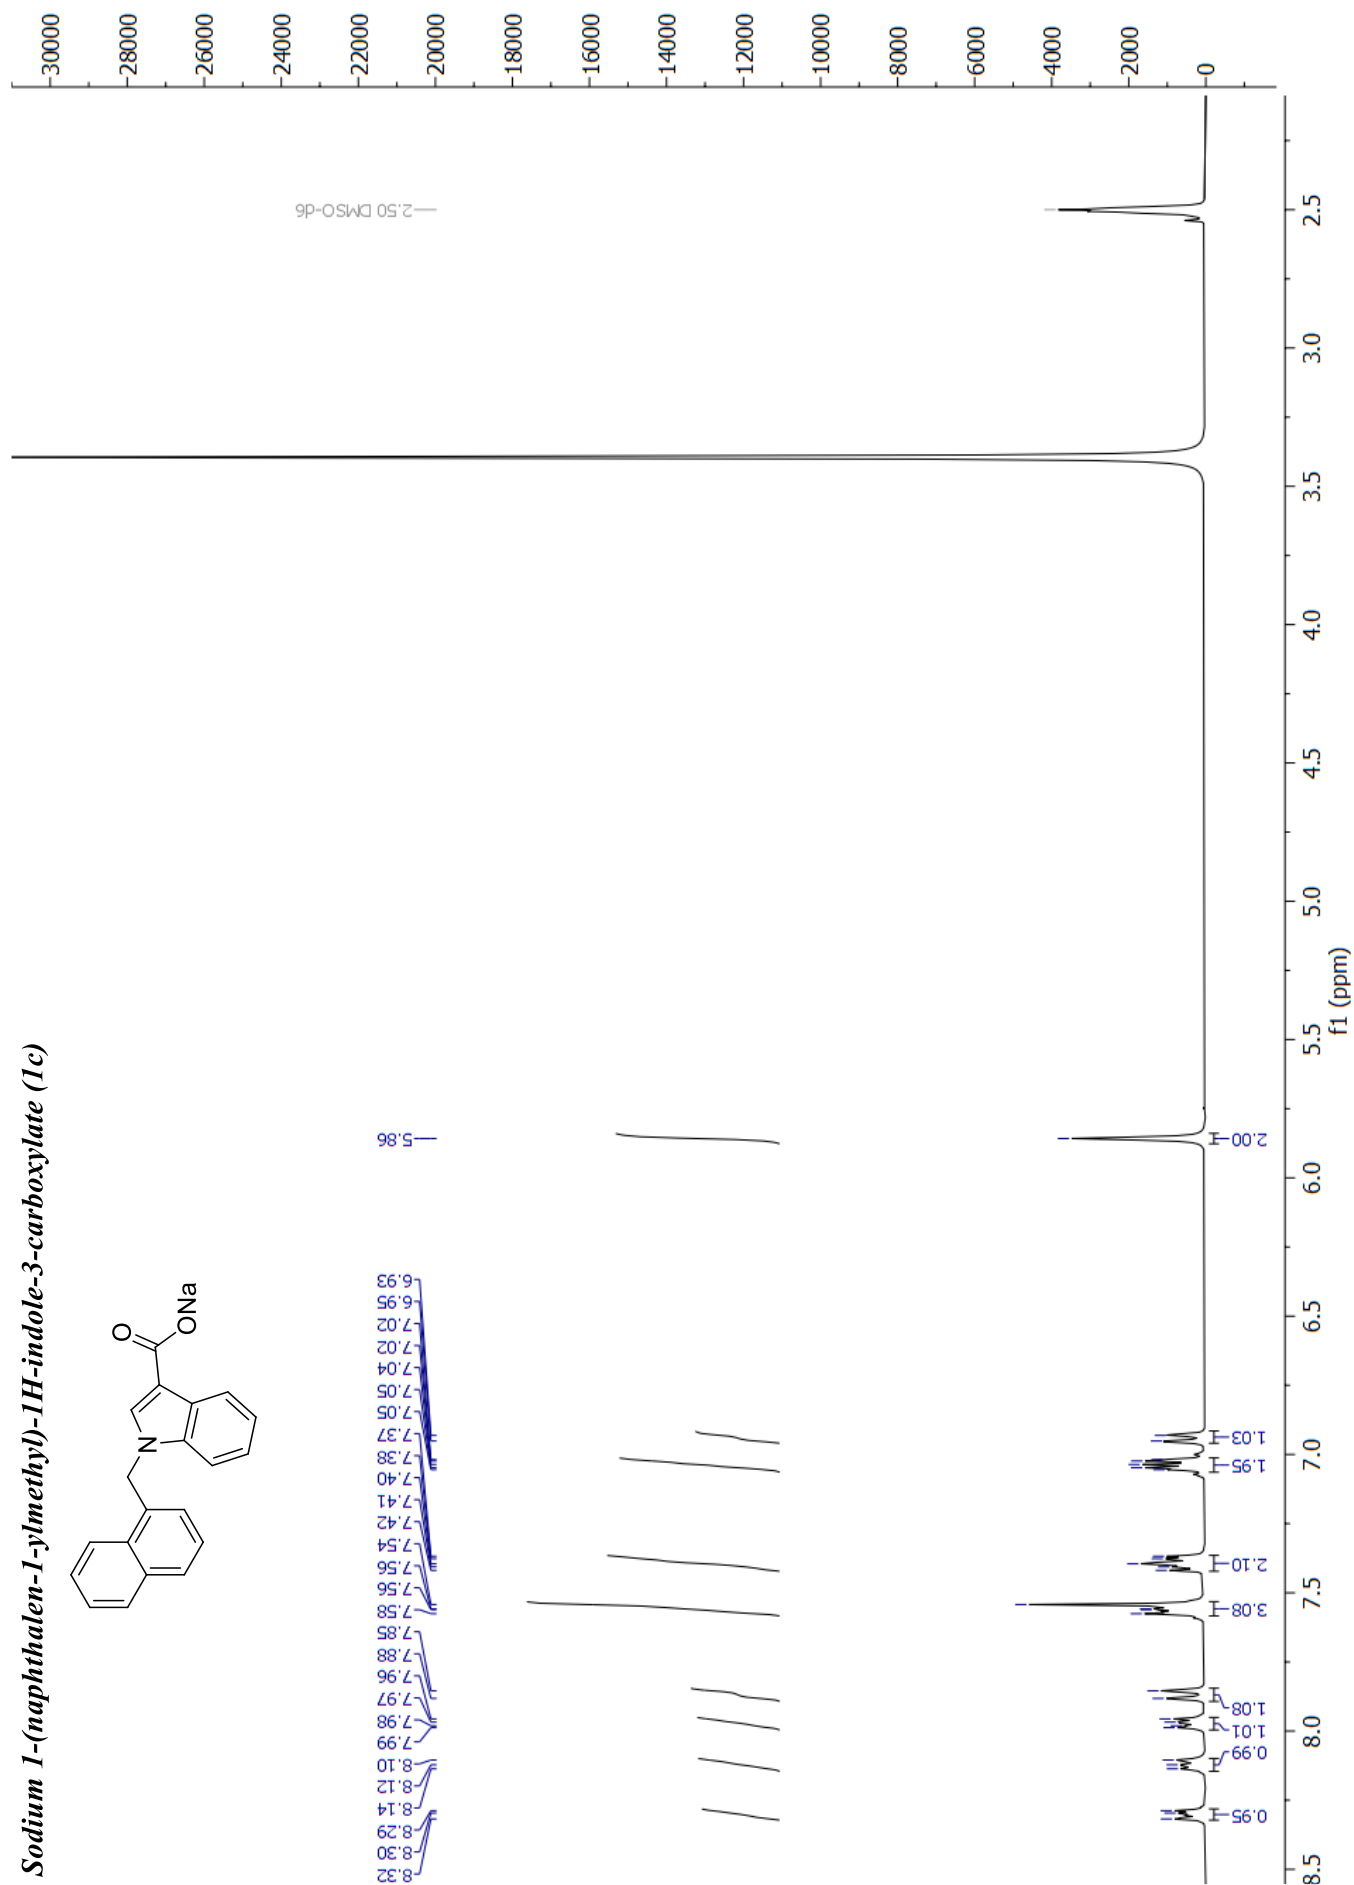

**Sodium 1-(naphthalen-1-ylmethyl)-1H-indole-3-carboxylate (1c)**

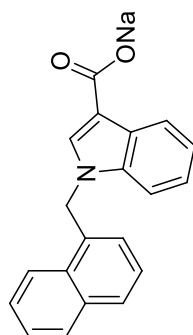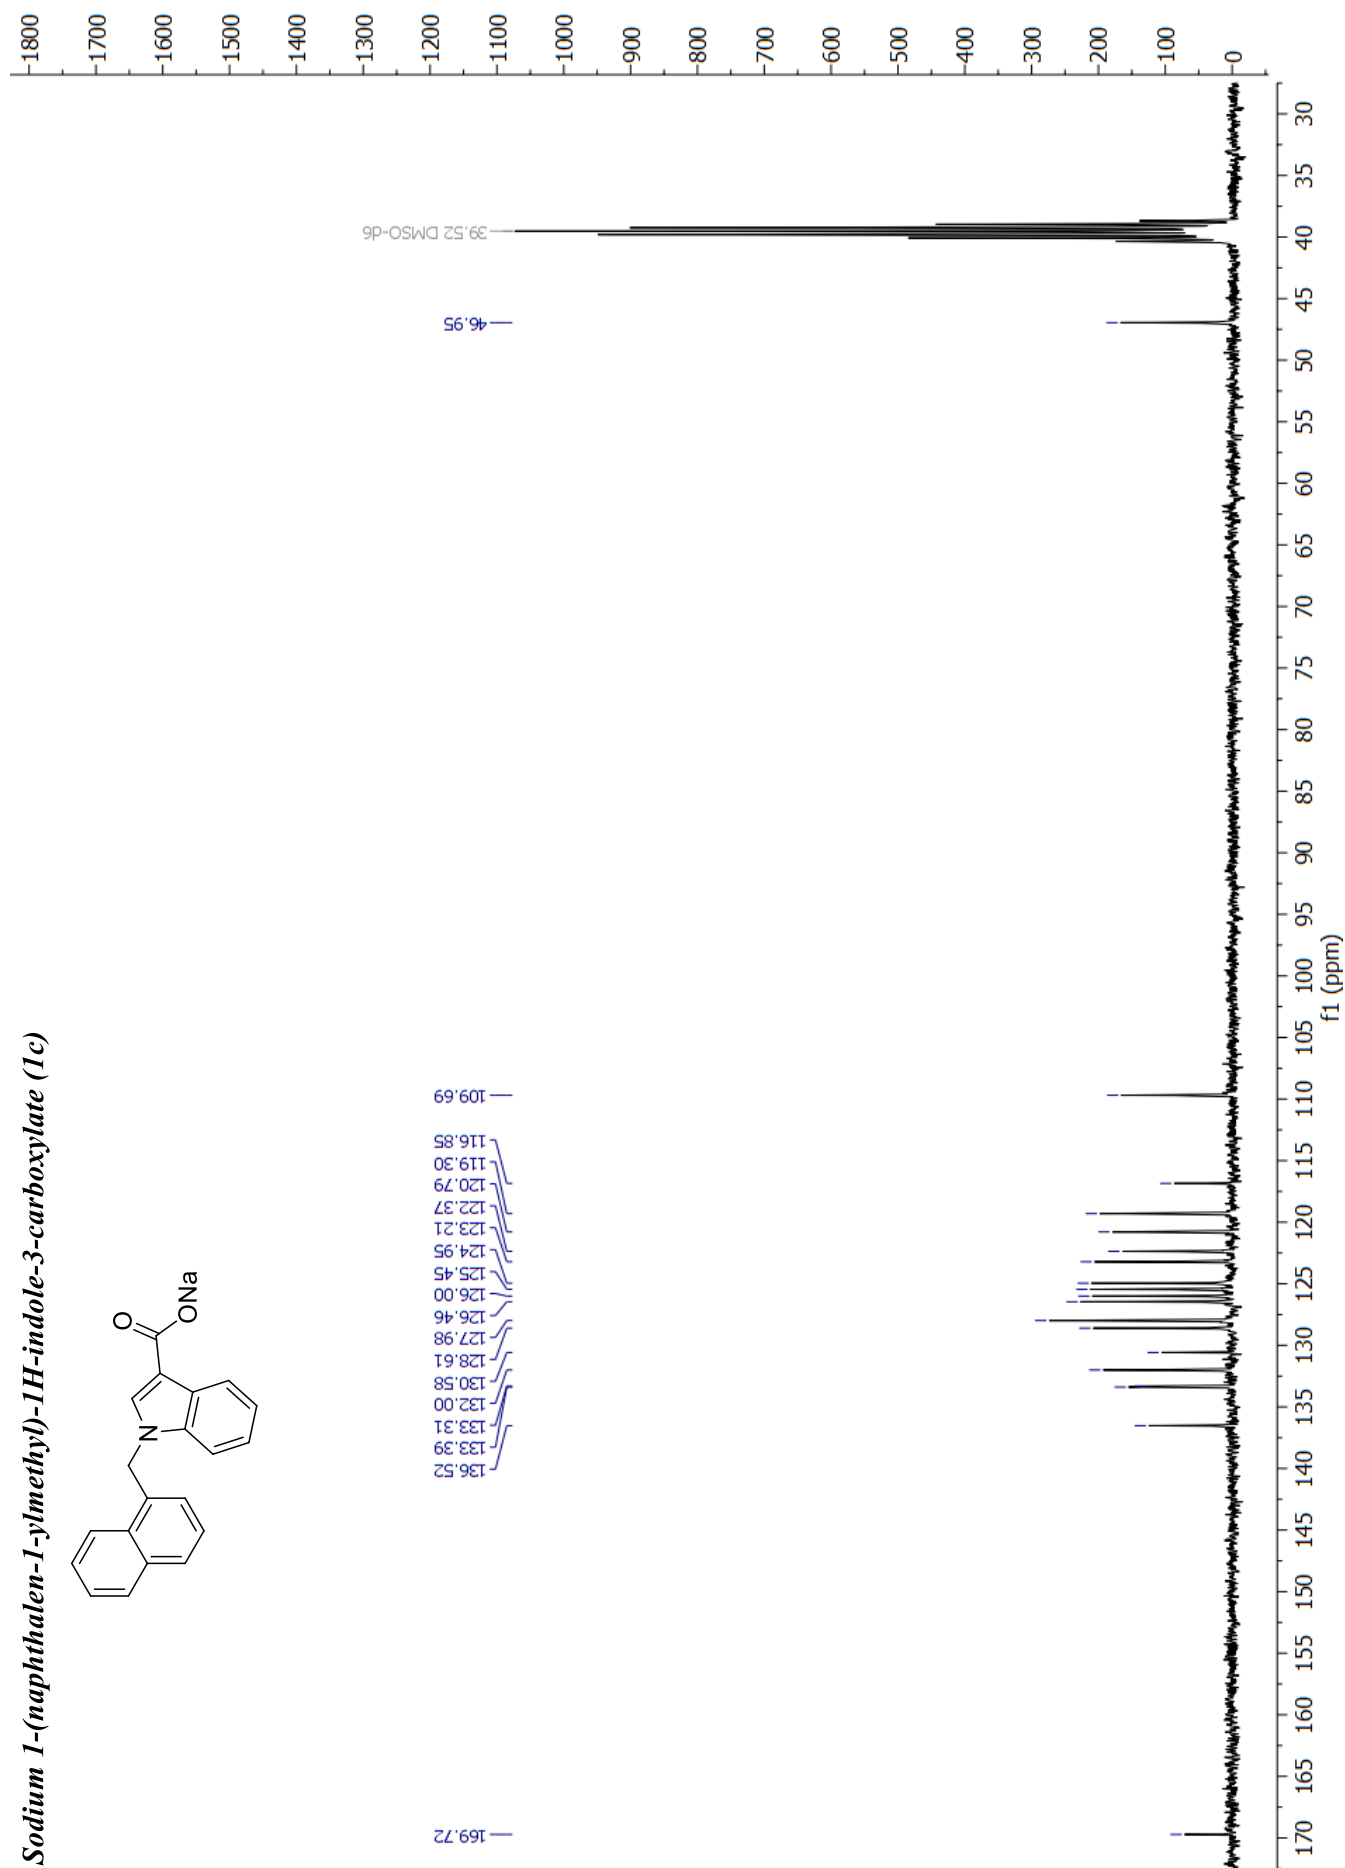

**1-(naphthalen-1-ylmethyl)-1H-indole-5-carboxylic acid (3a)**

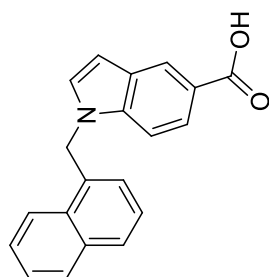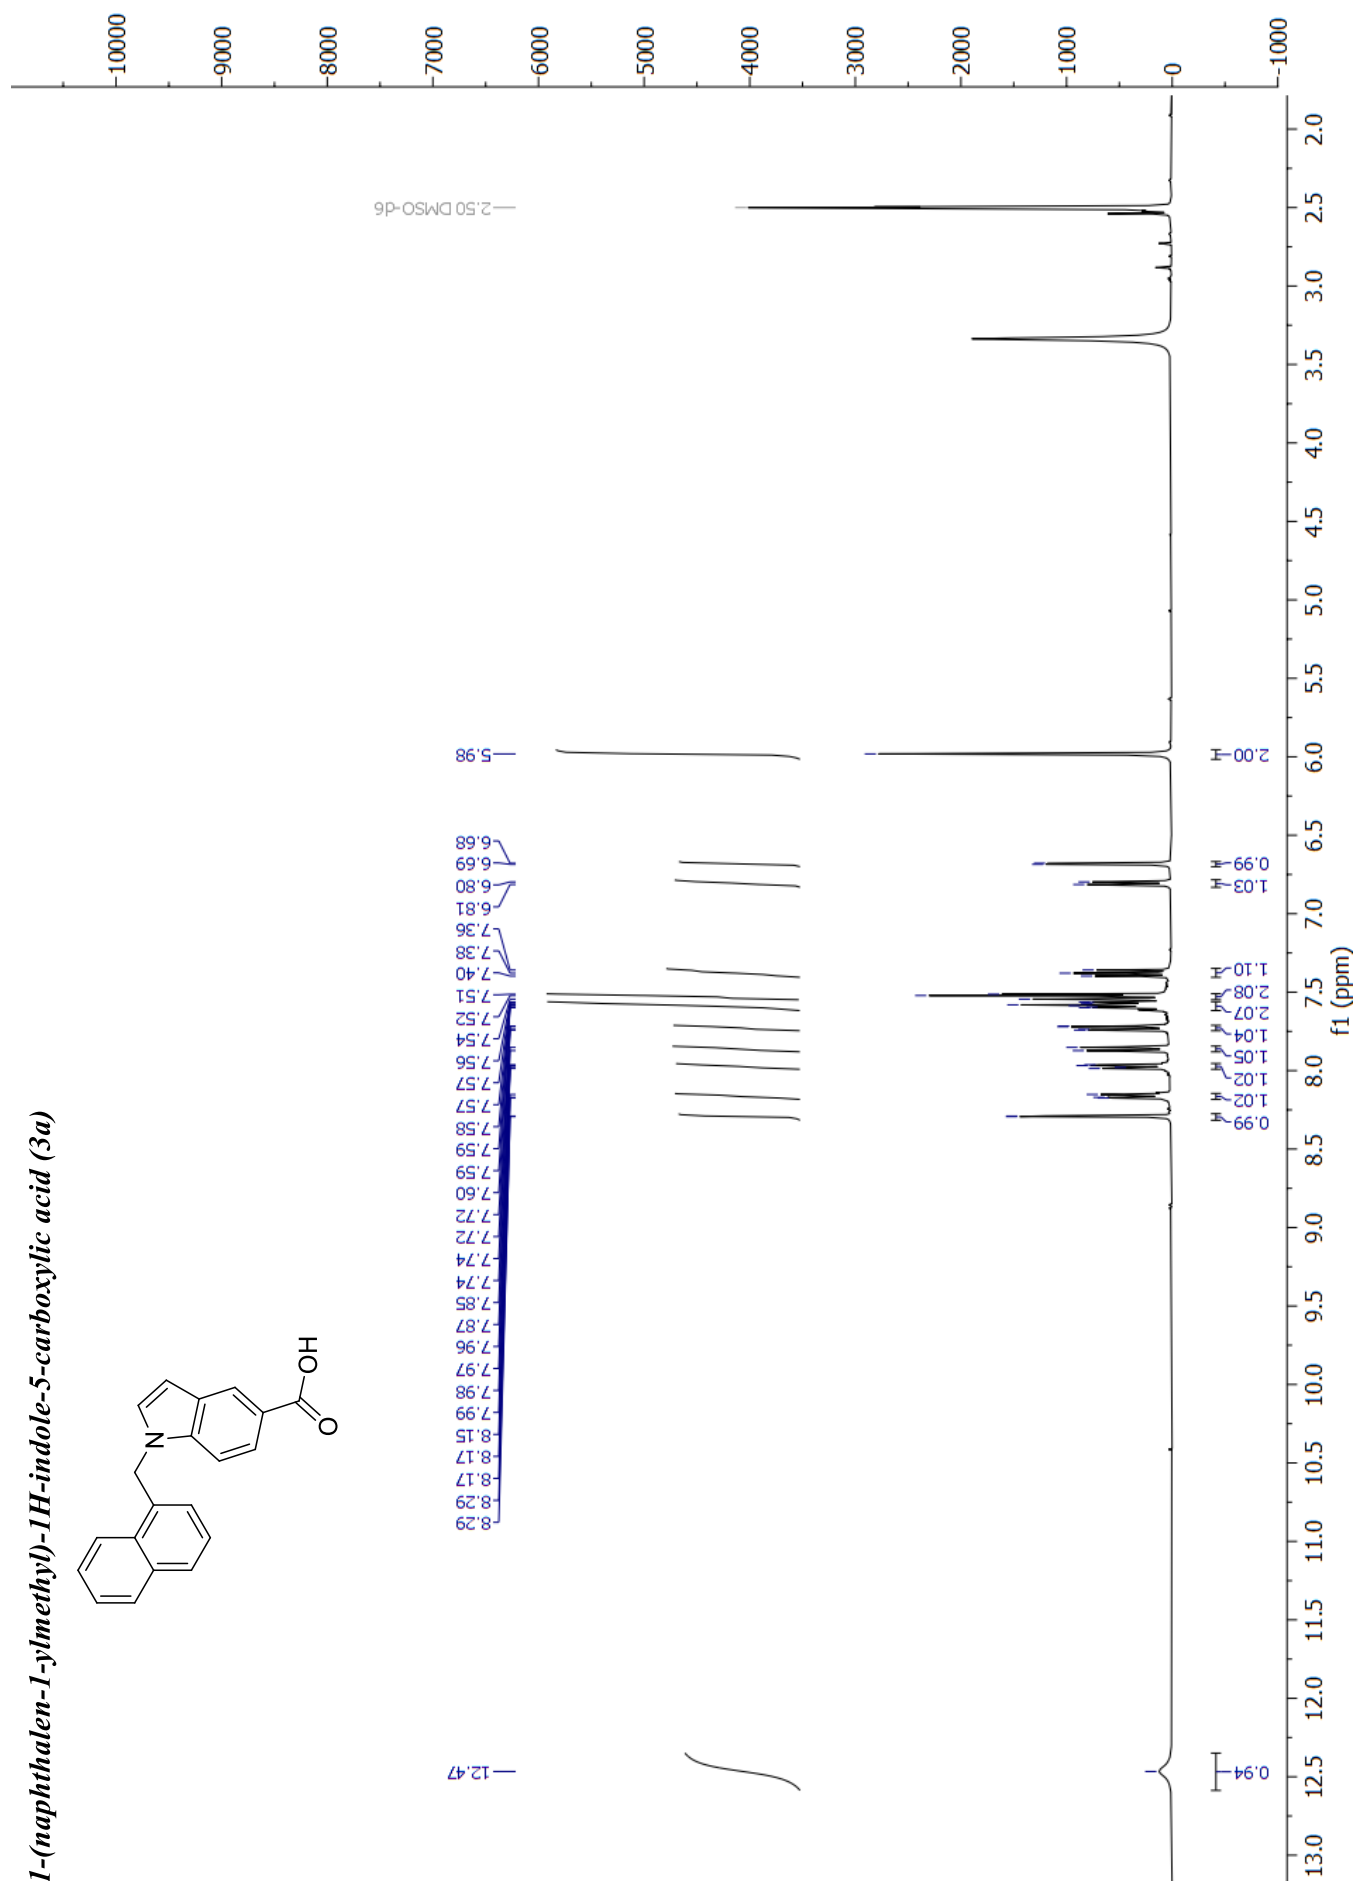

***1-(naphthalen-1-ylmethyl)-1H-indole-5-carboxylic acid (3a)***

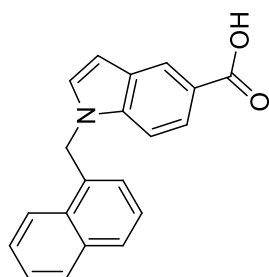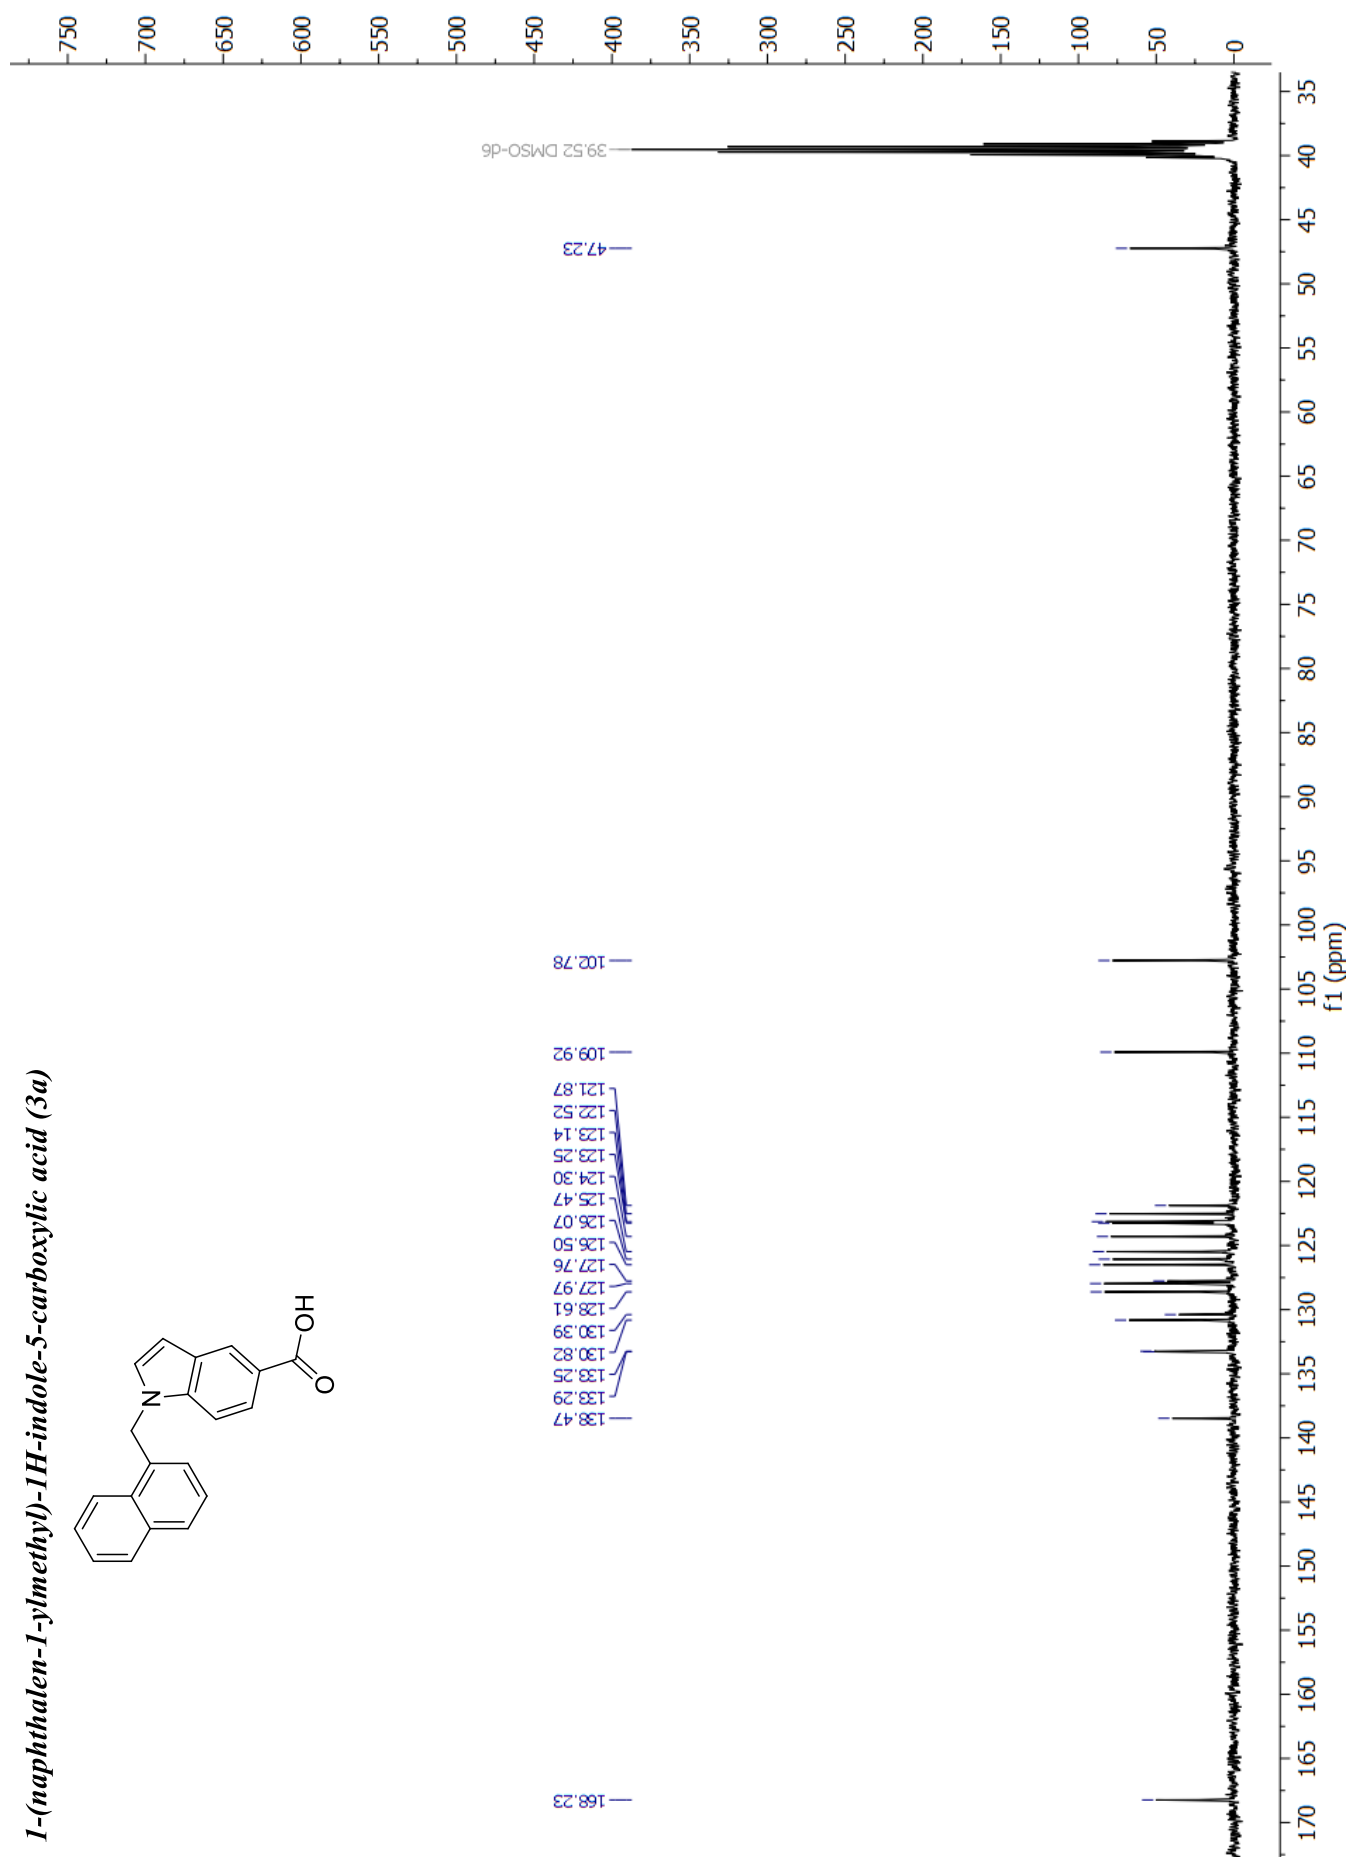

*1-(naphthalen-1-ylmethyl)-1H-indole-6-carboxylic acid (4a)*

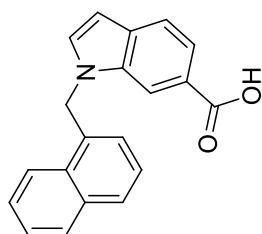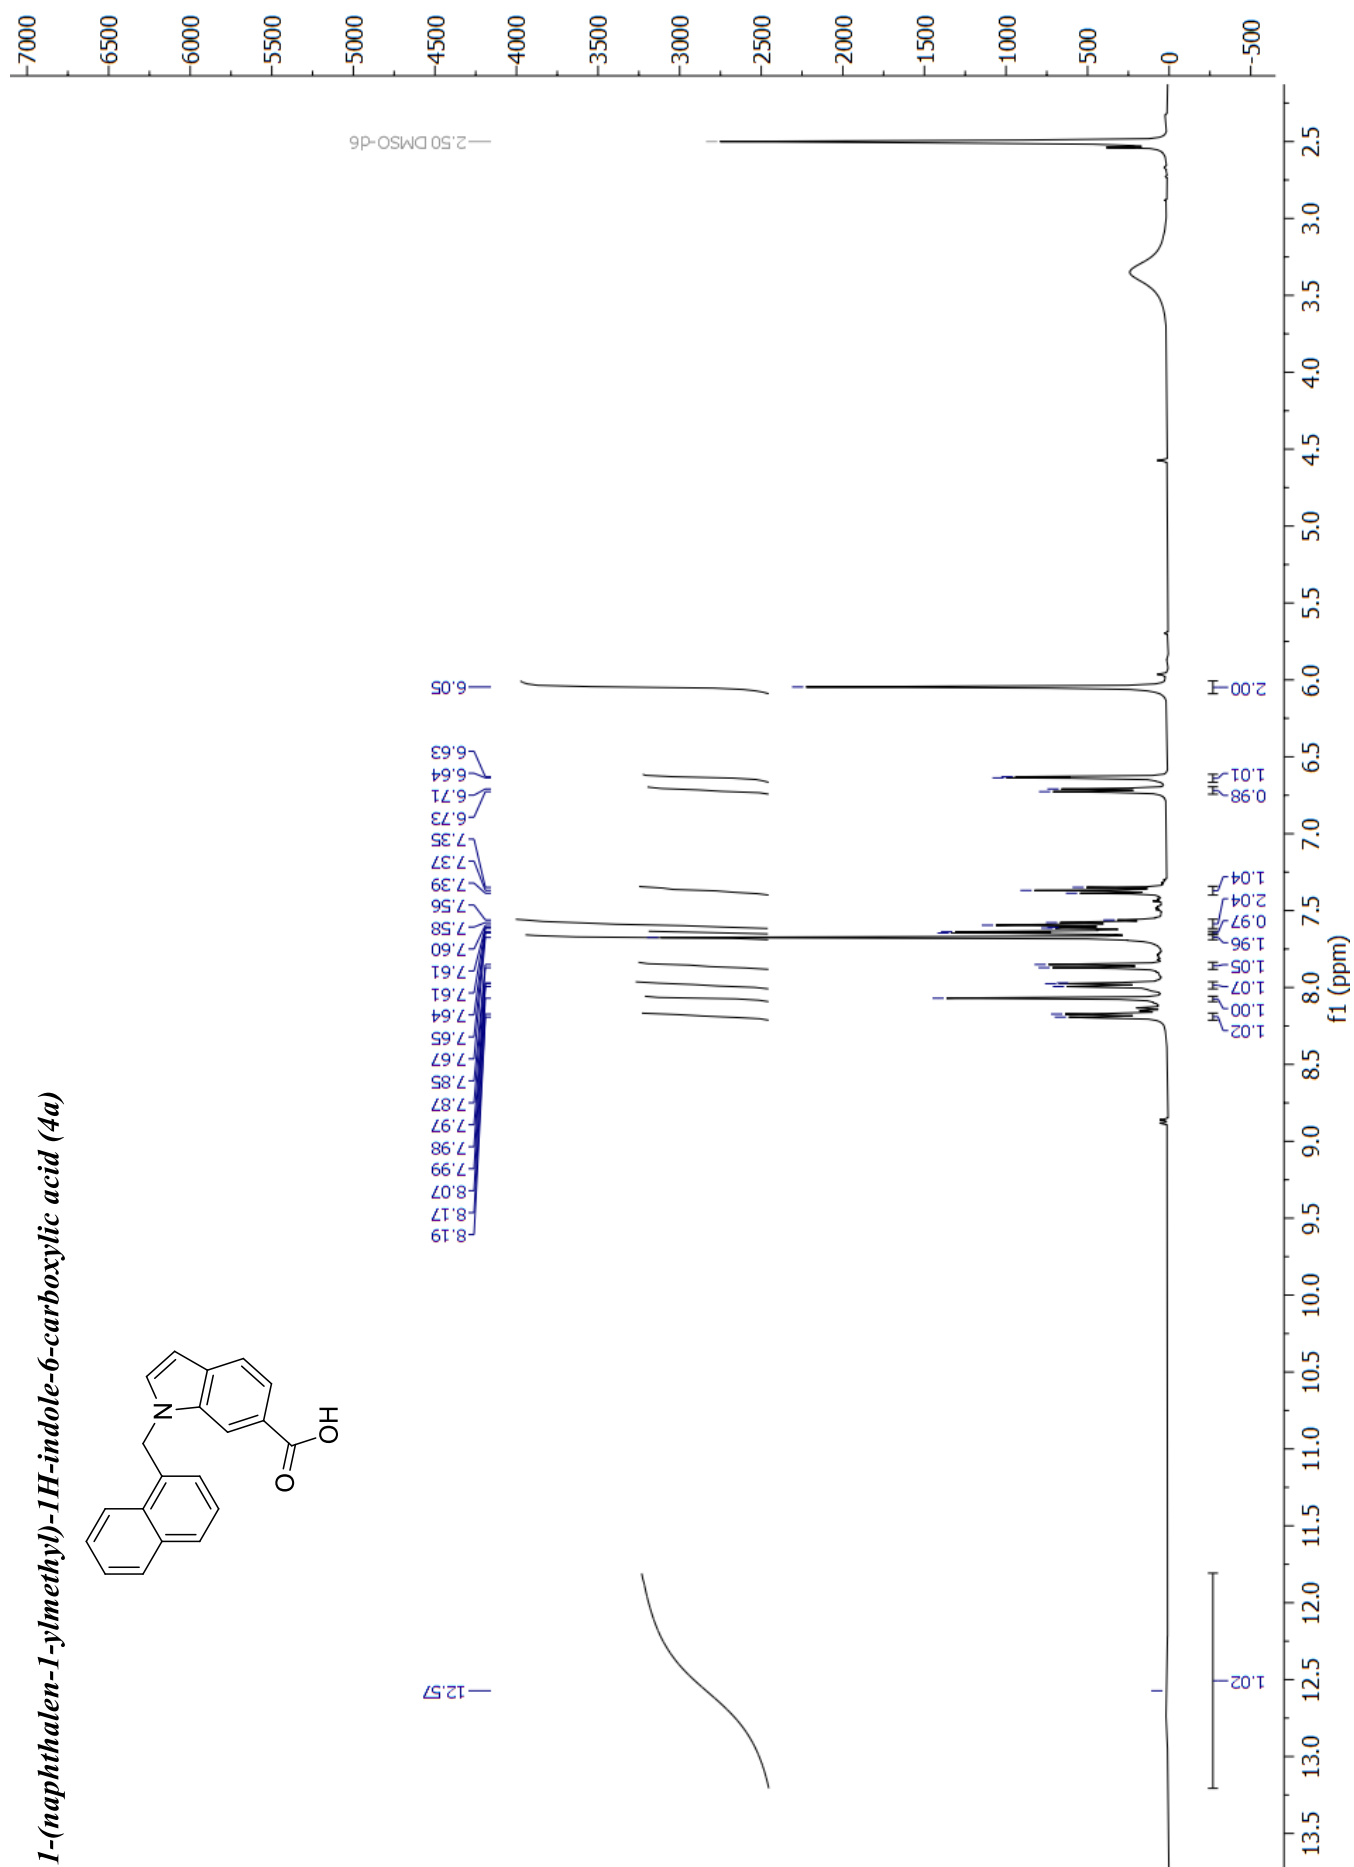

***1-(naphthalen-1-ylmethyl)-1H-indole-6-carboxylic acid (4a)***

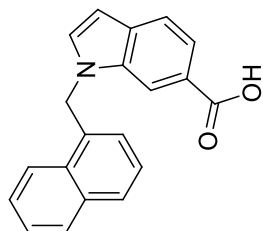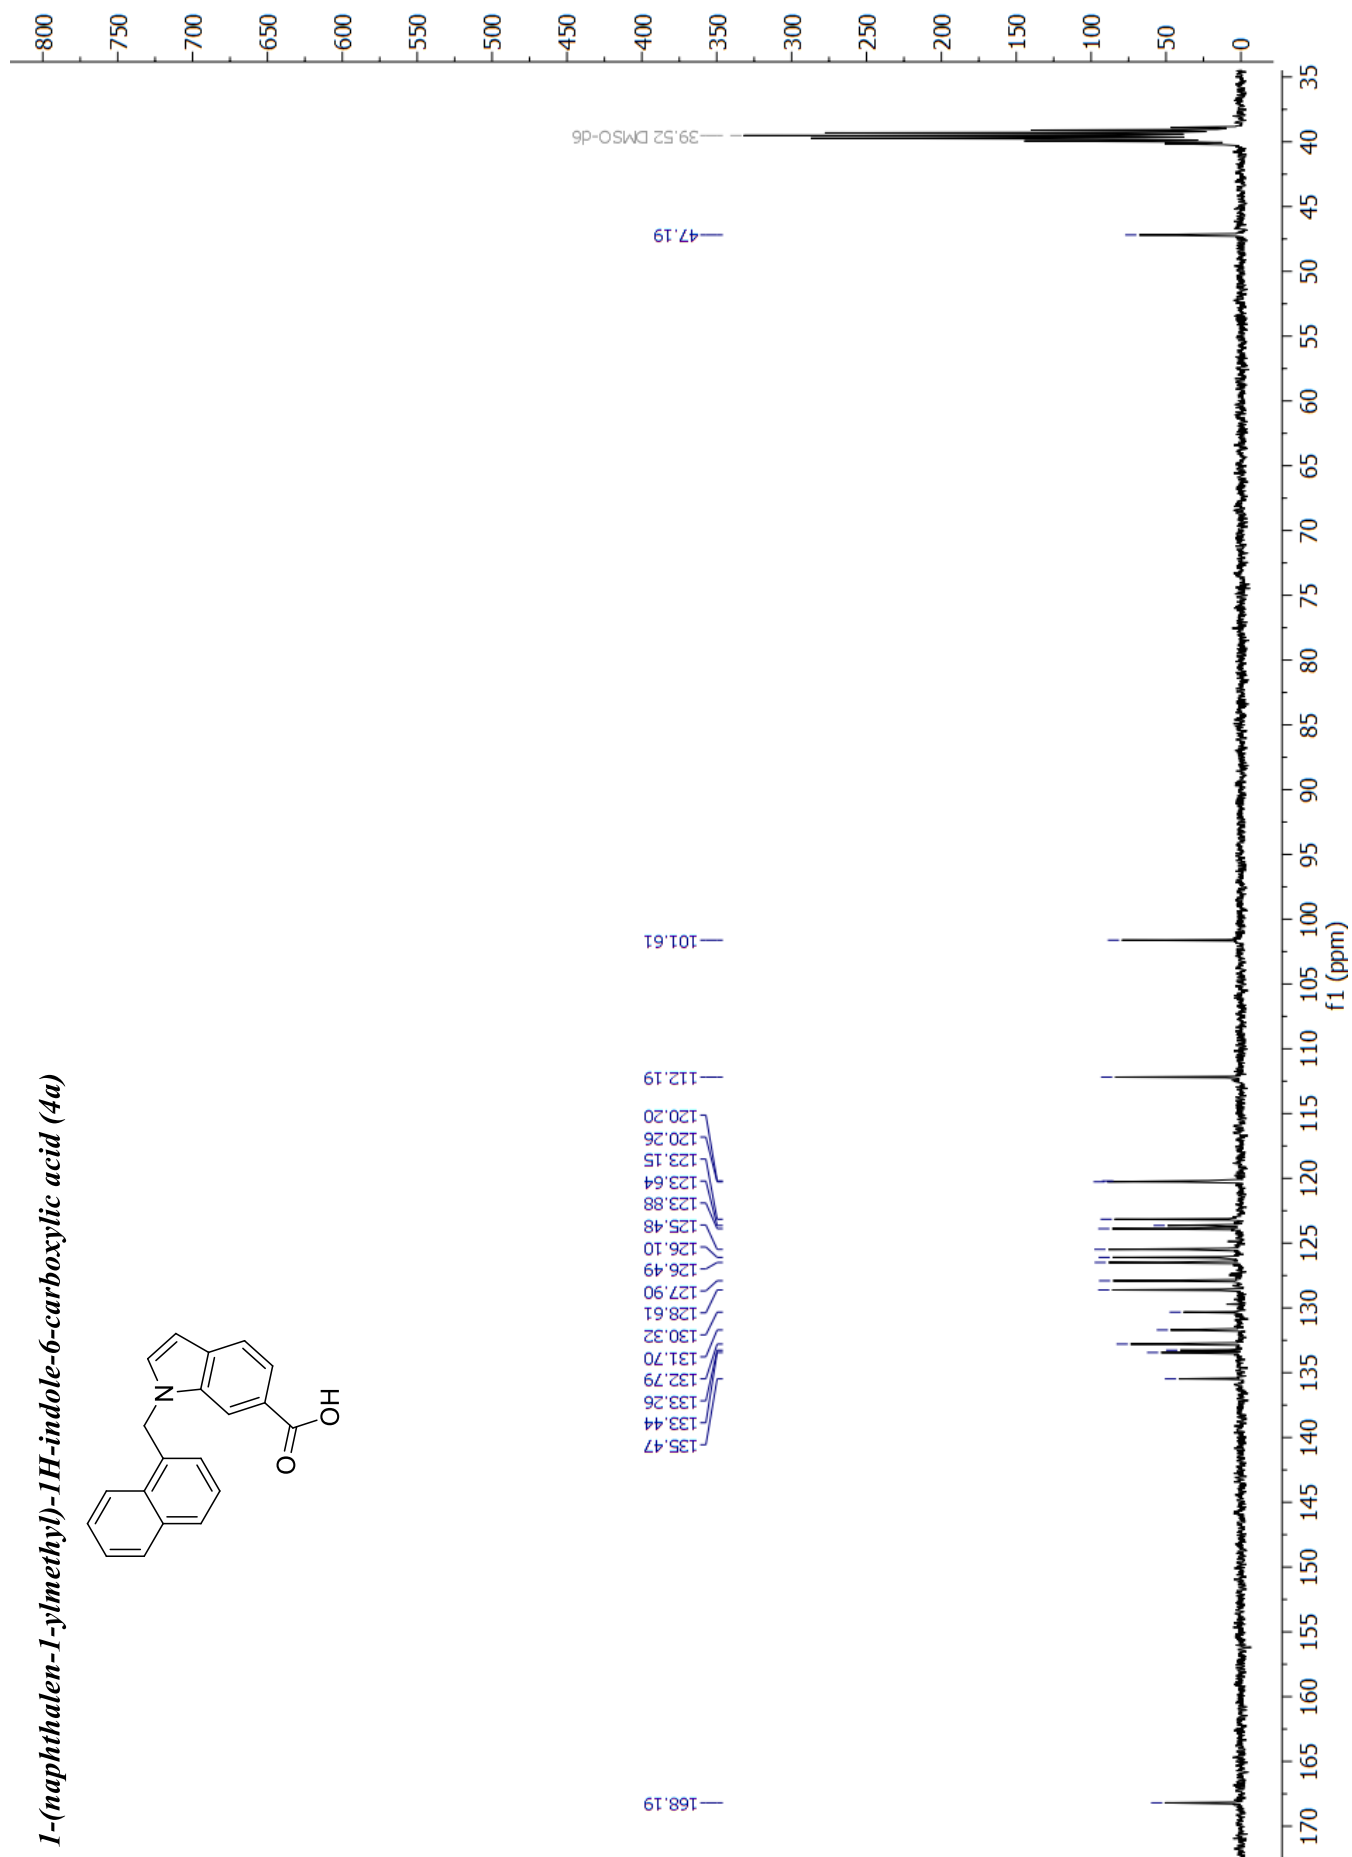

**1-(naphthalen-2-ylmethyl)-1H-indole-5-carboxylic acid (4b)**

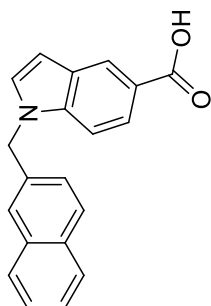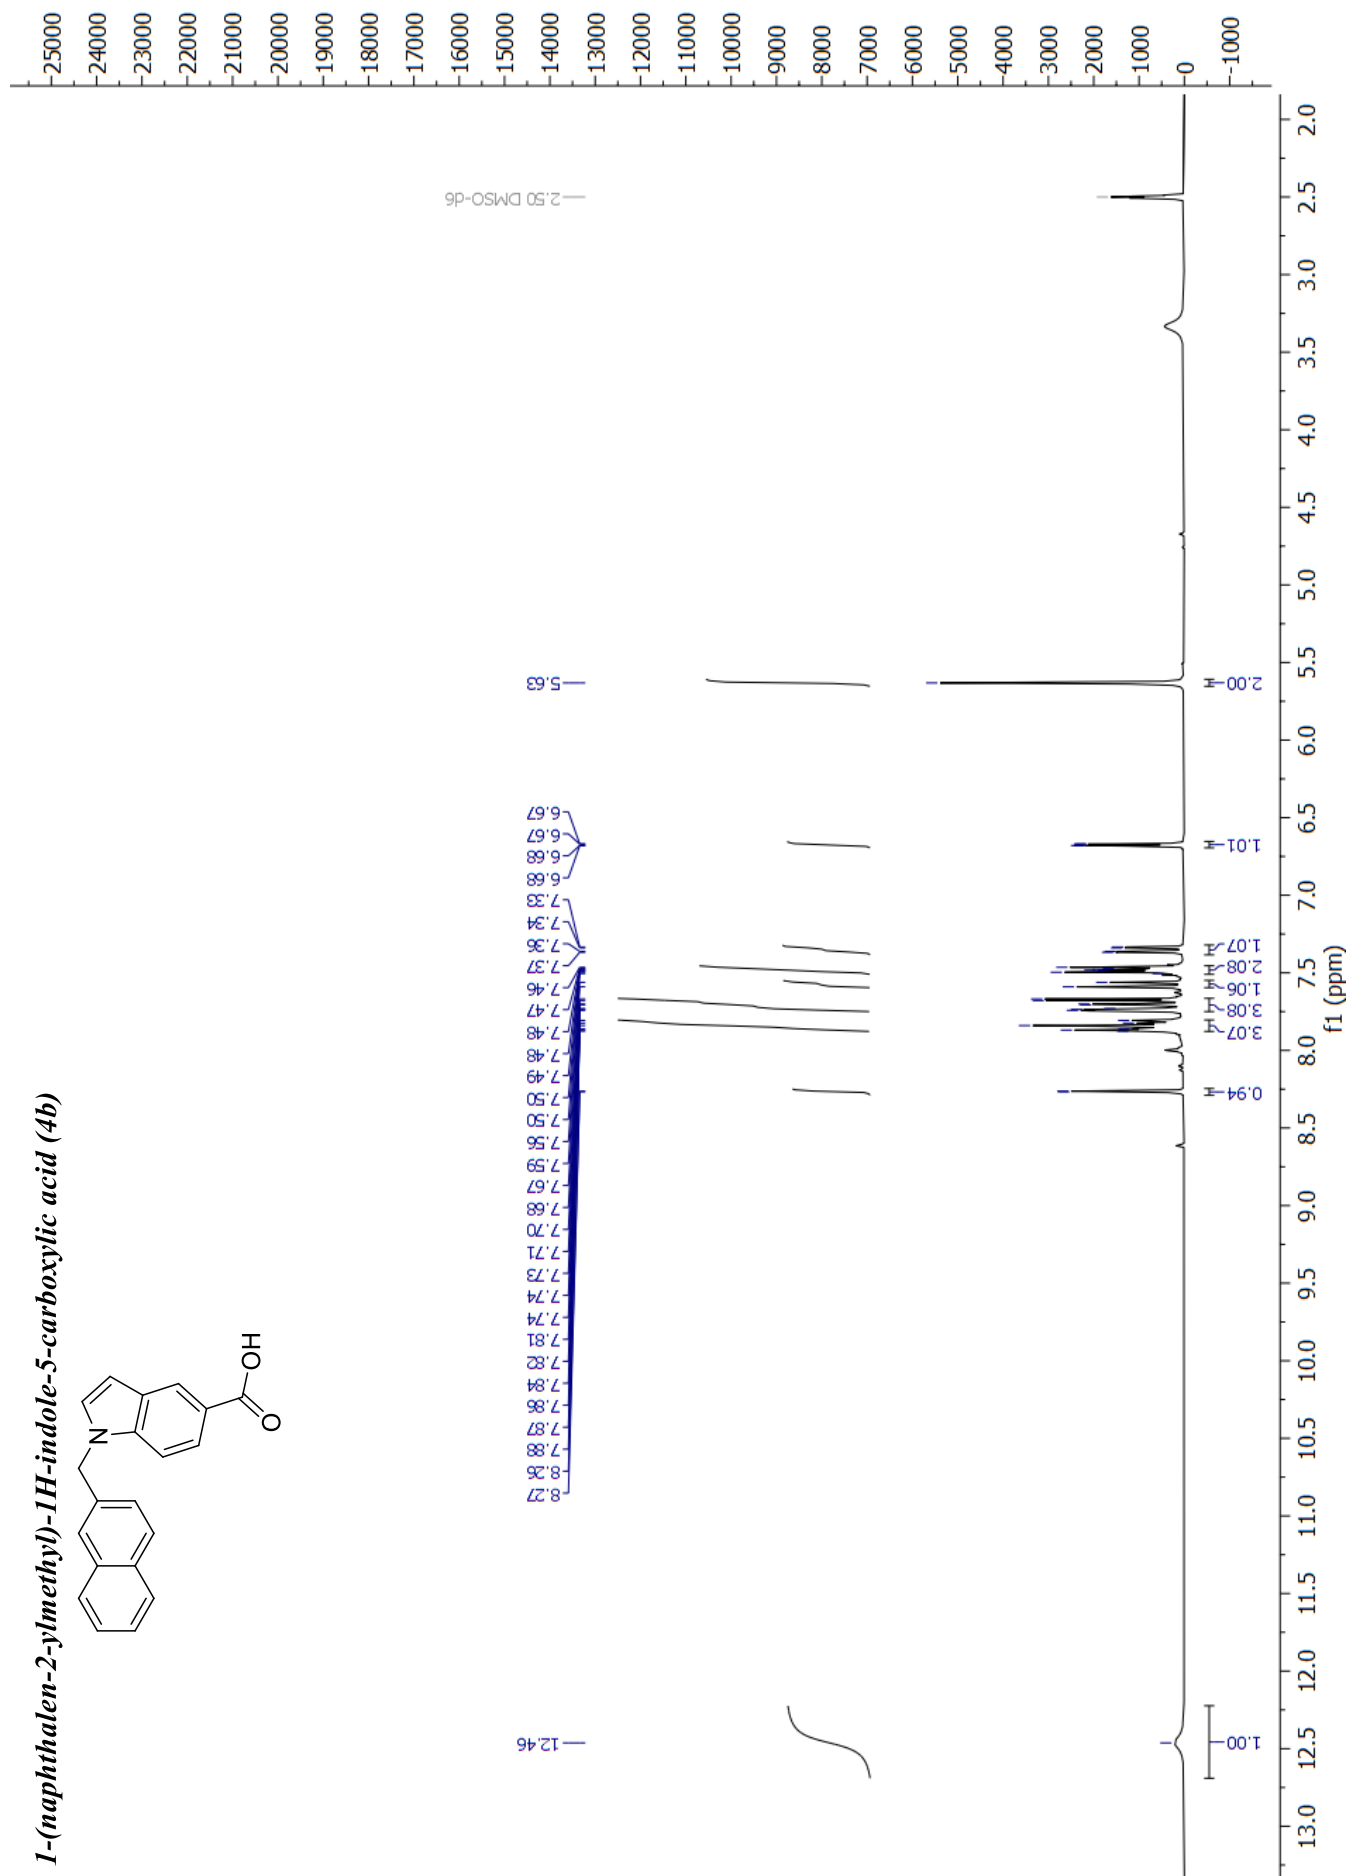

**1-(naphthalen-2-ylmethyl)-1H-indole-5-carboxylic acid (4b)**

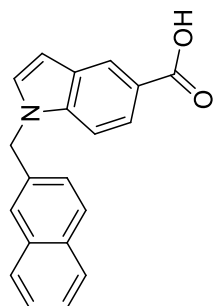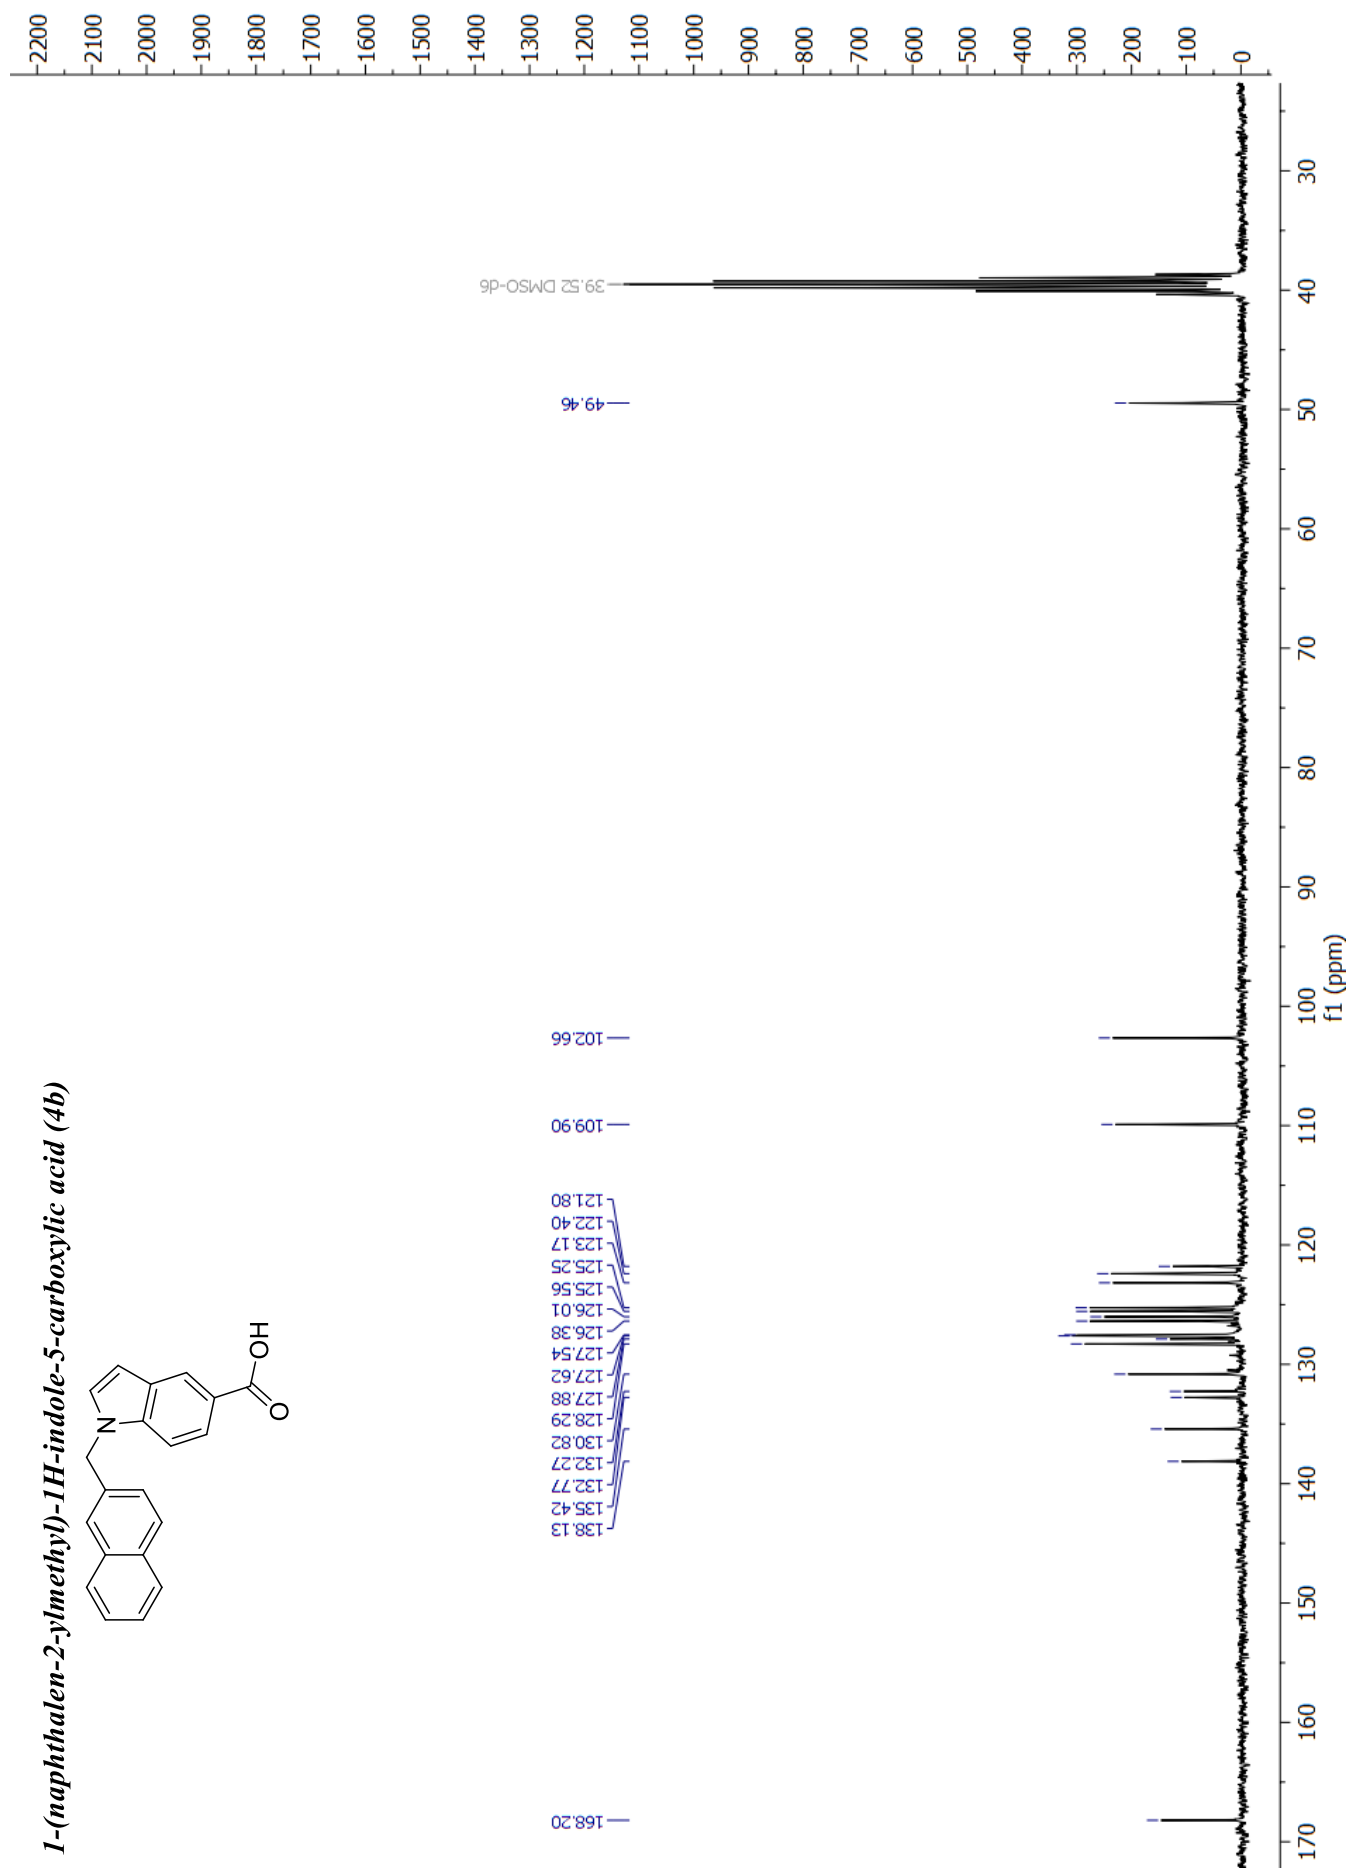



*Ethyl 1-(naphthalen-1-ylmethyl)-1H-indole-2-carboxylate (2c)*

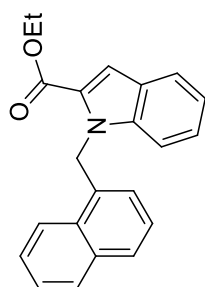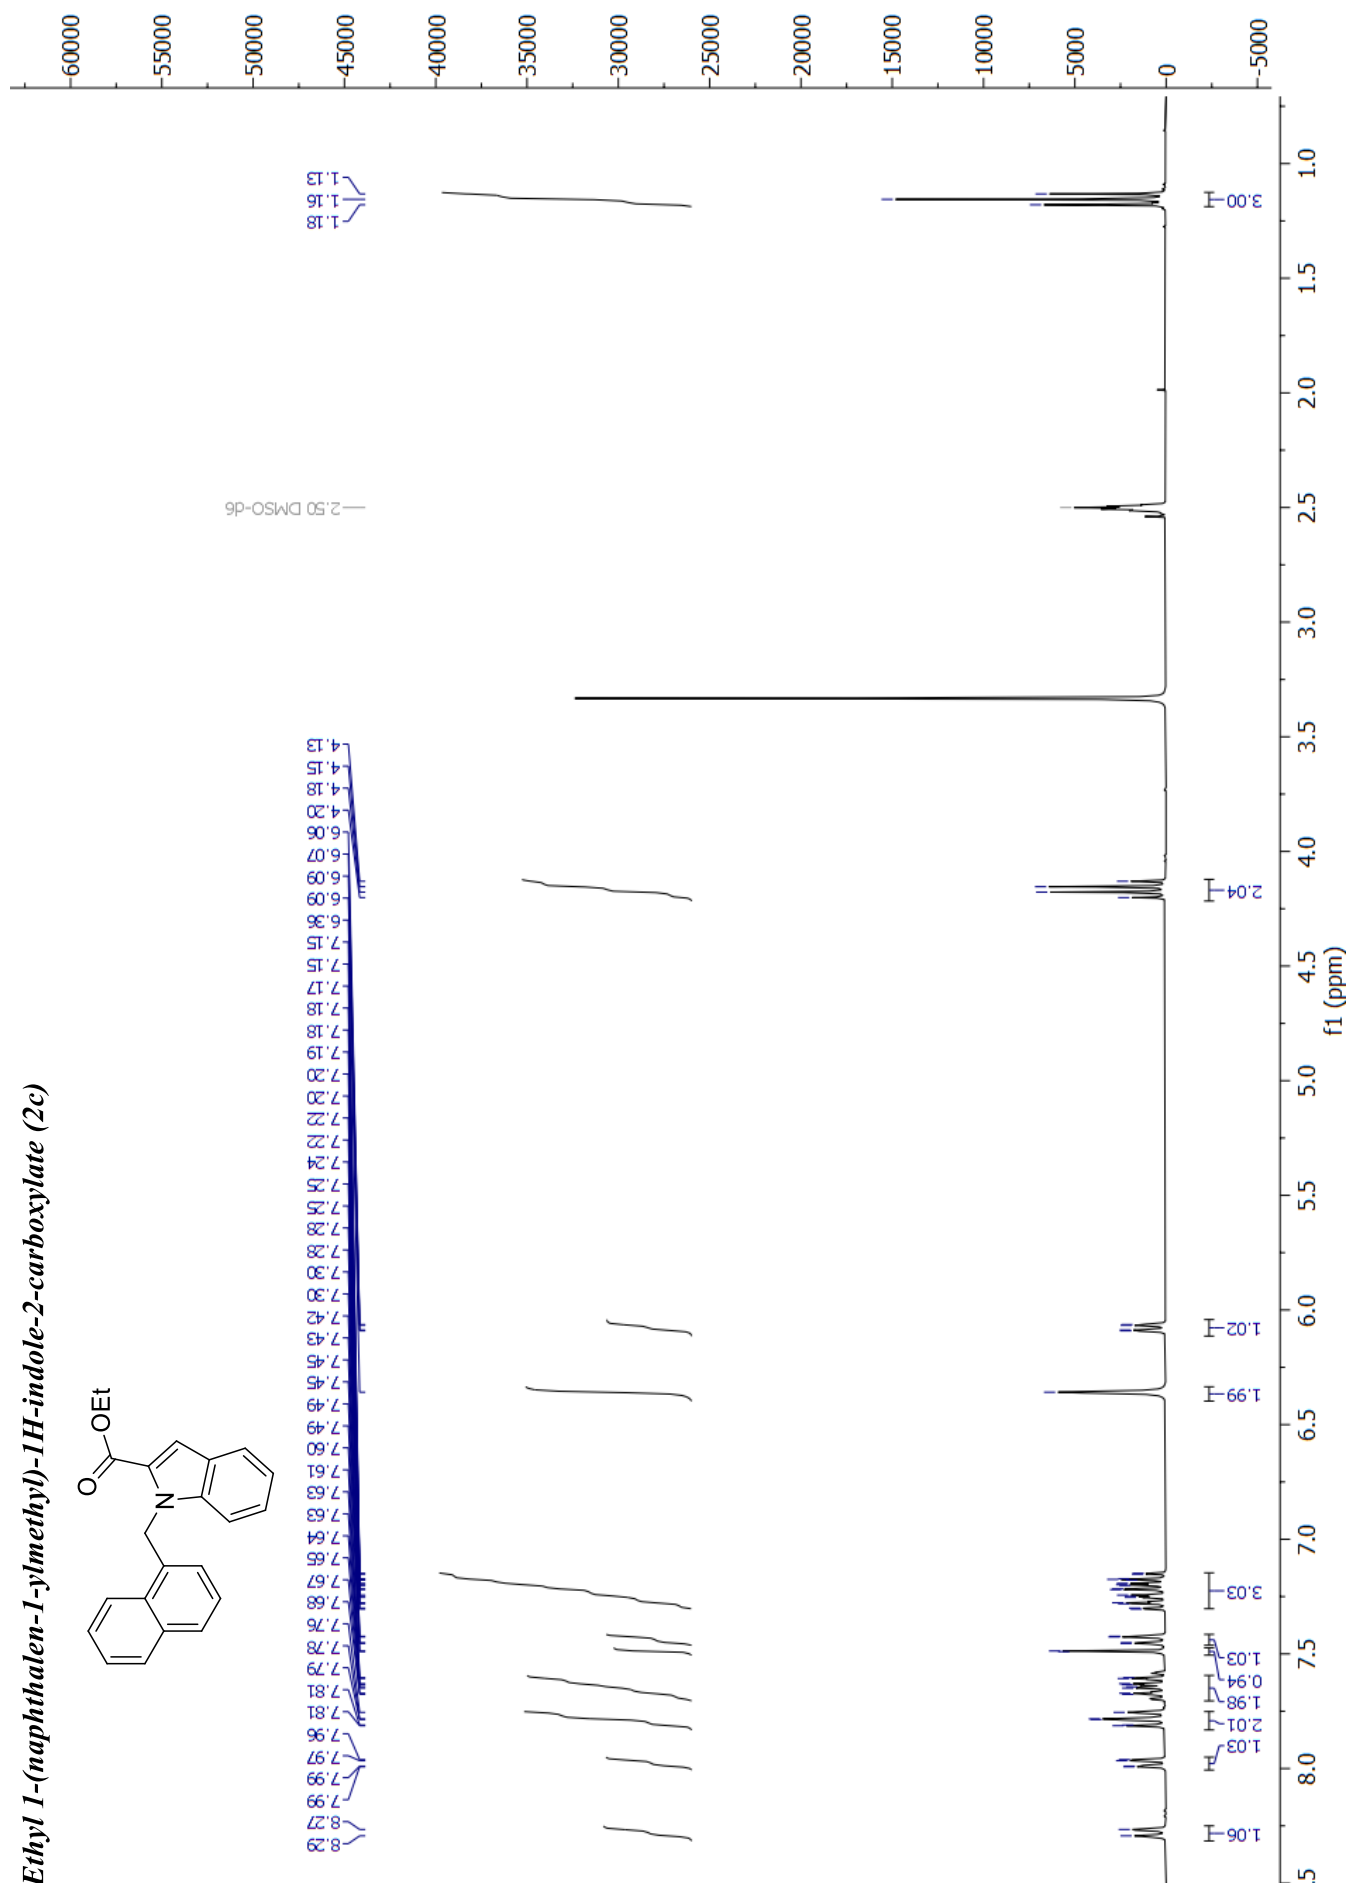

***Ethyl 1-(naphthalen-1-ylmethyl)-1H-indole-2-carboxylate (2c)***

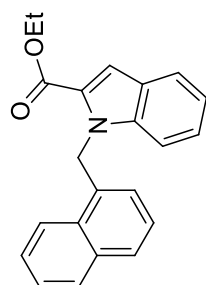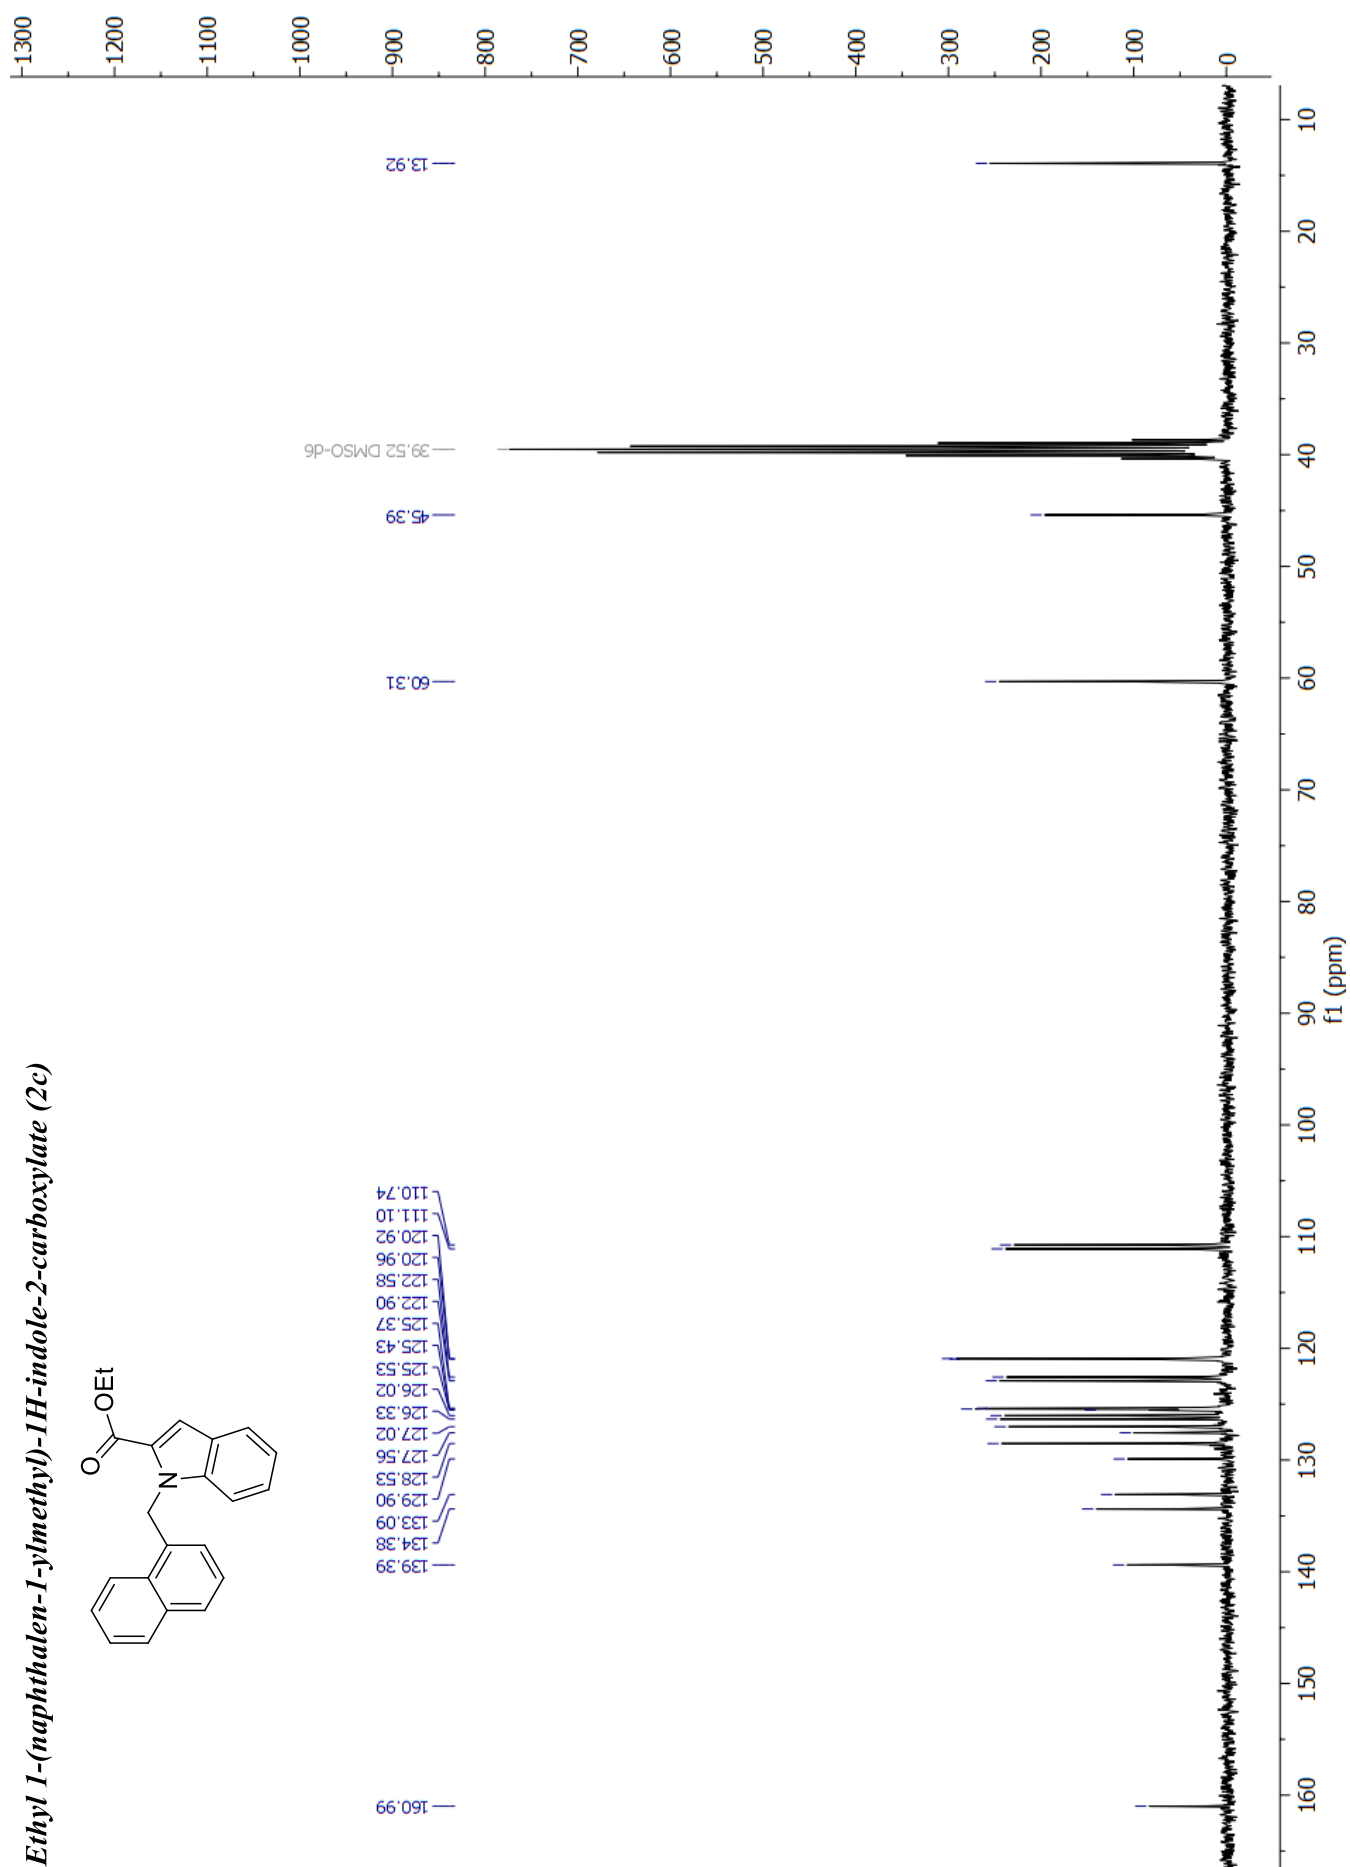

**Ethyl 1-(naphthalen-2-ylmethyl)-1H-indole-2-carboxylate (2d)**

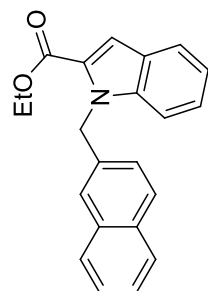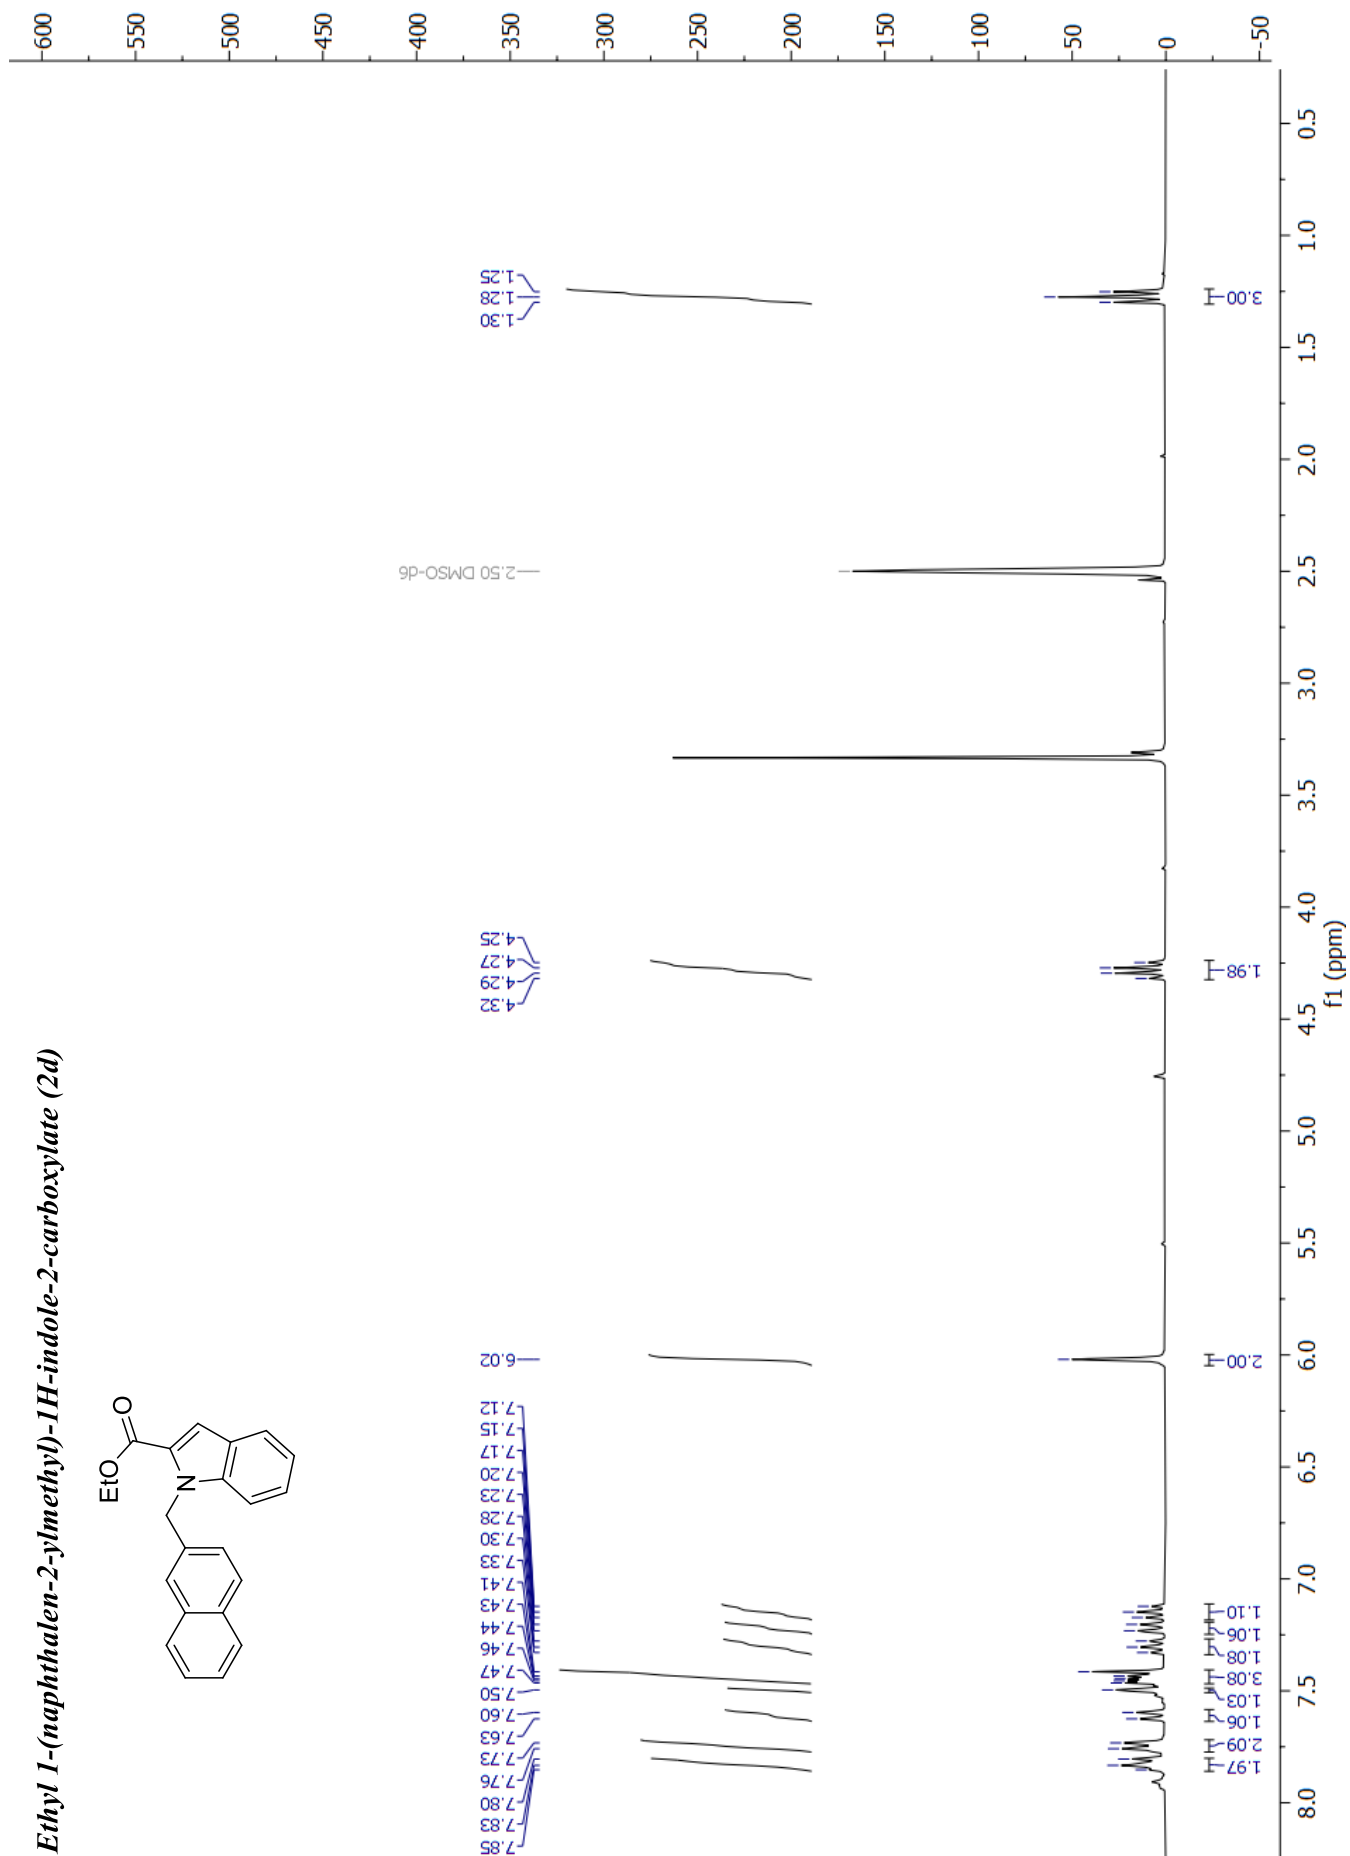

***Ethyl 1-(naphthalen-2-ylmethyl)-1H-indole-2-carboxylate (2d)***

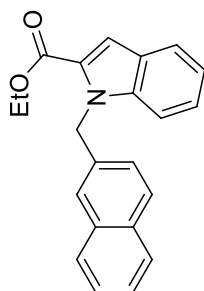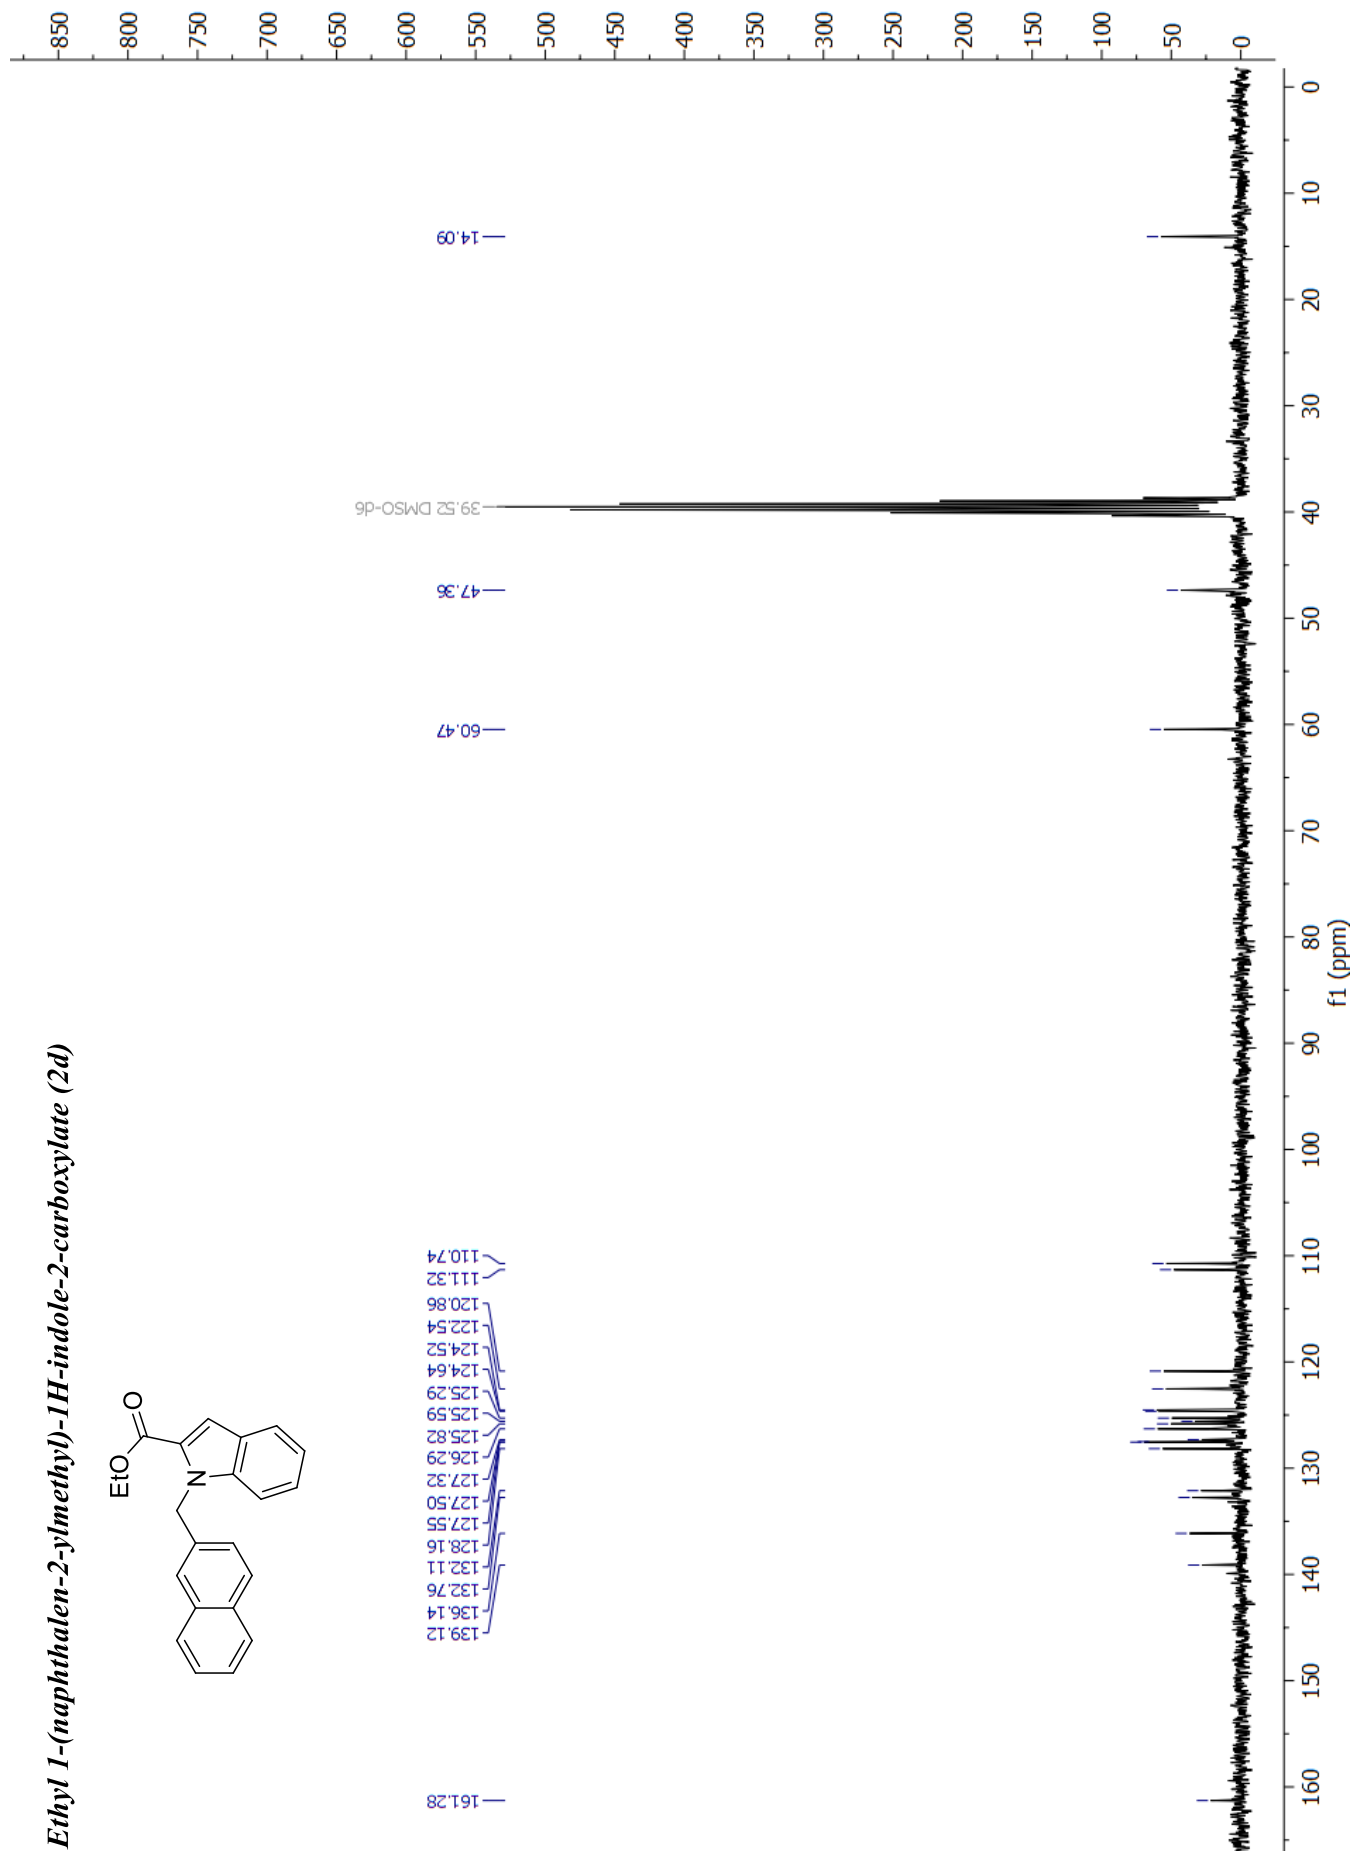

**Methyl 1-(naphthalen-2-ylmethyl)-1H-indole-6-carboxylate (3c)**

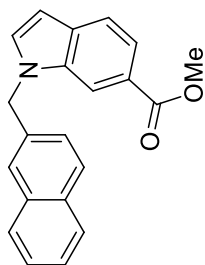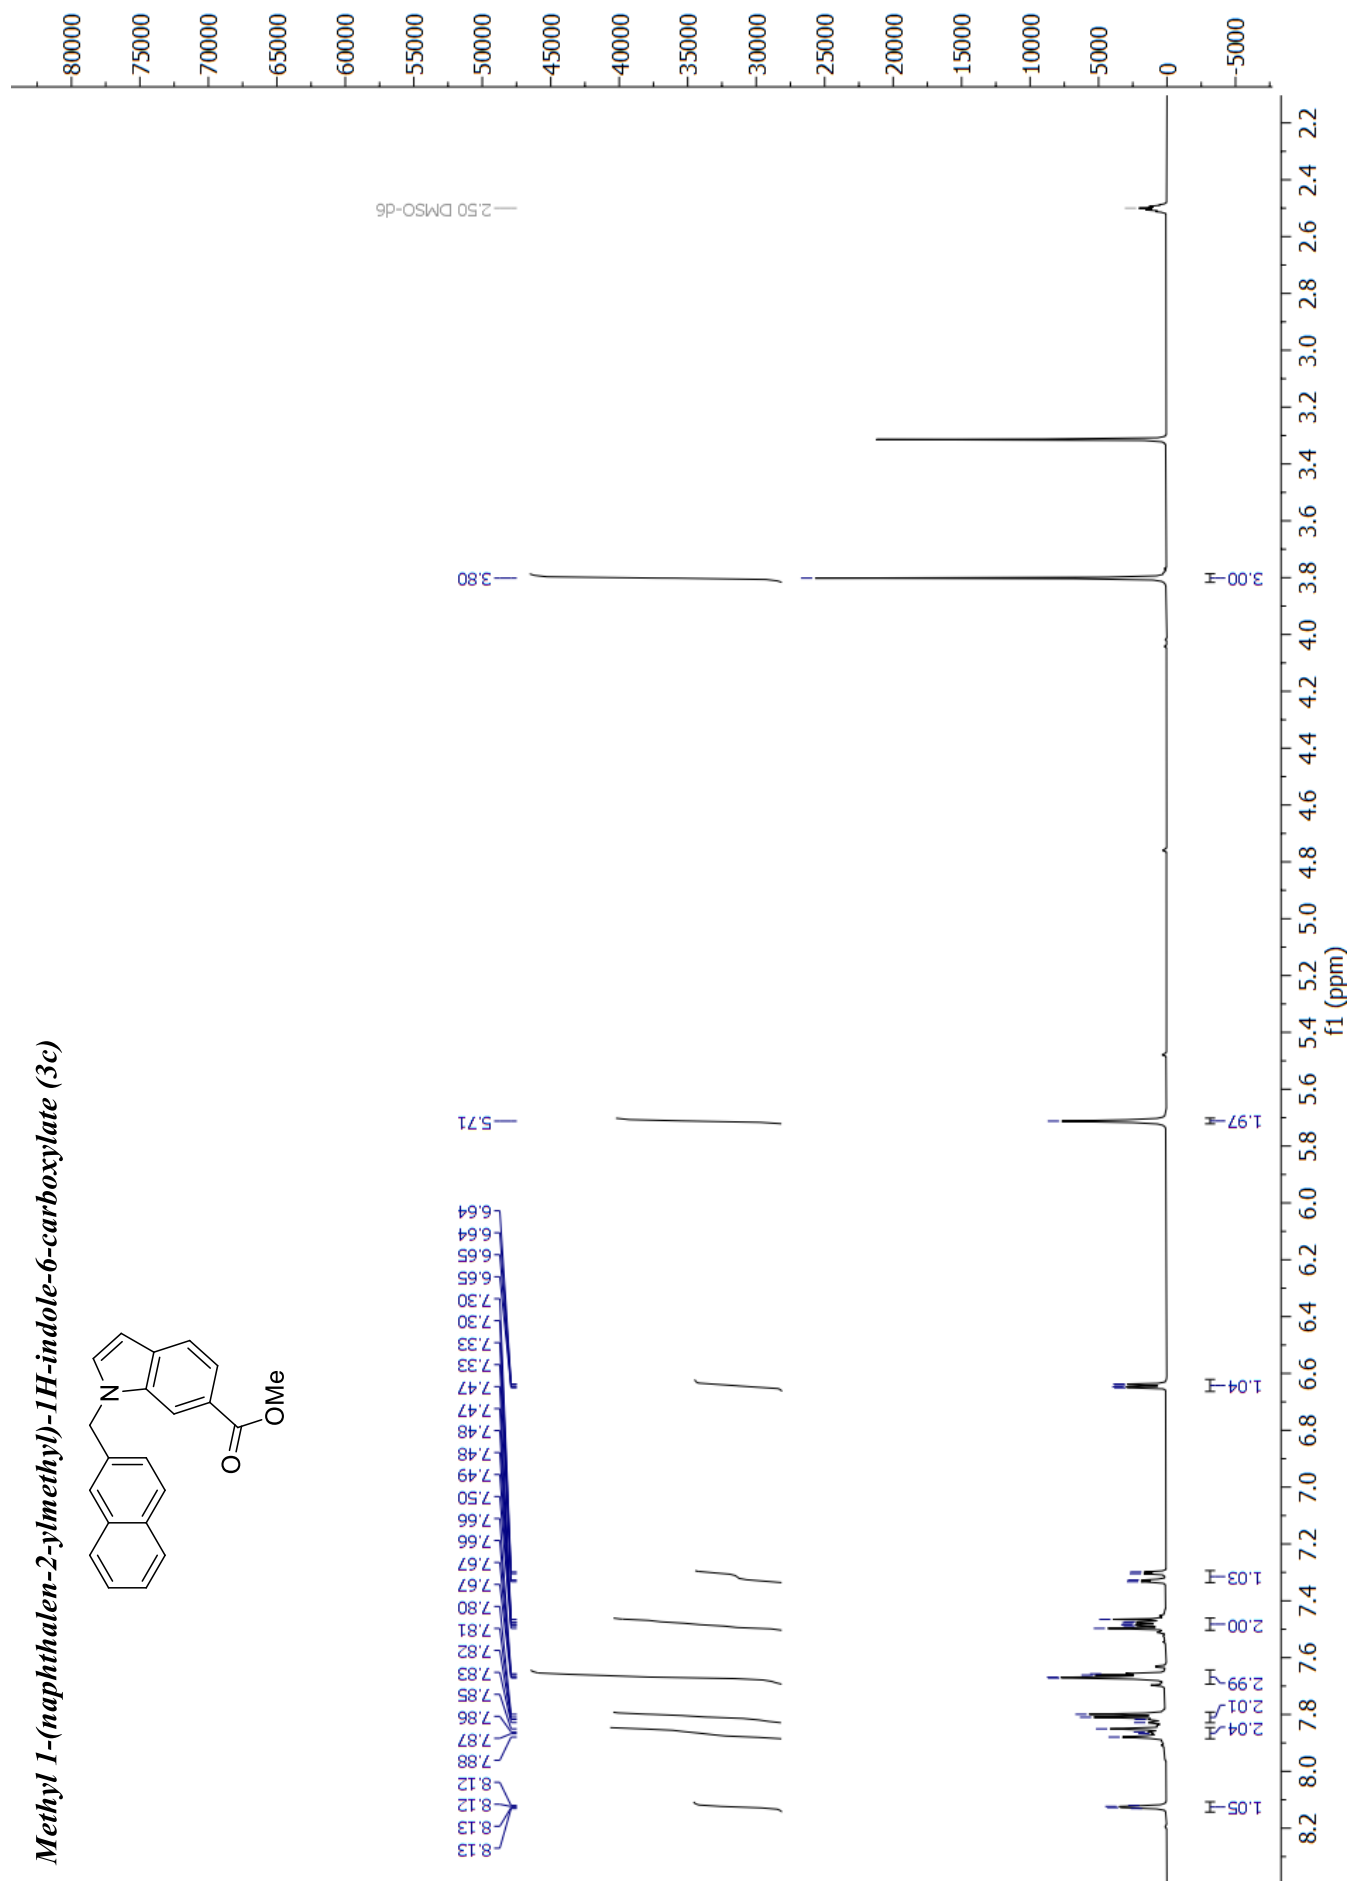

**Methyl 1-(naphthalen-2-ylmethyl)-1H-indole-6-carboxylate (3c)**

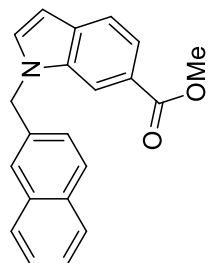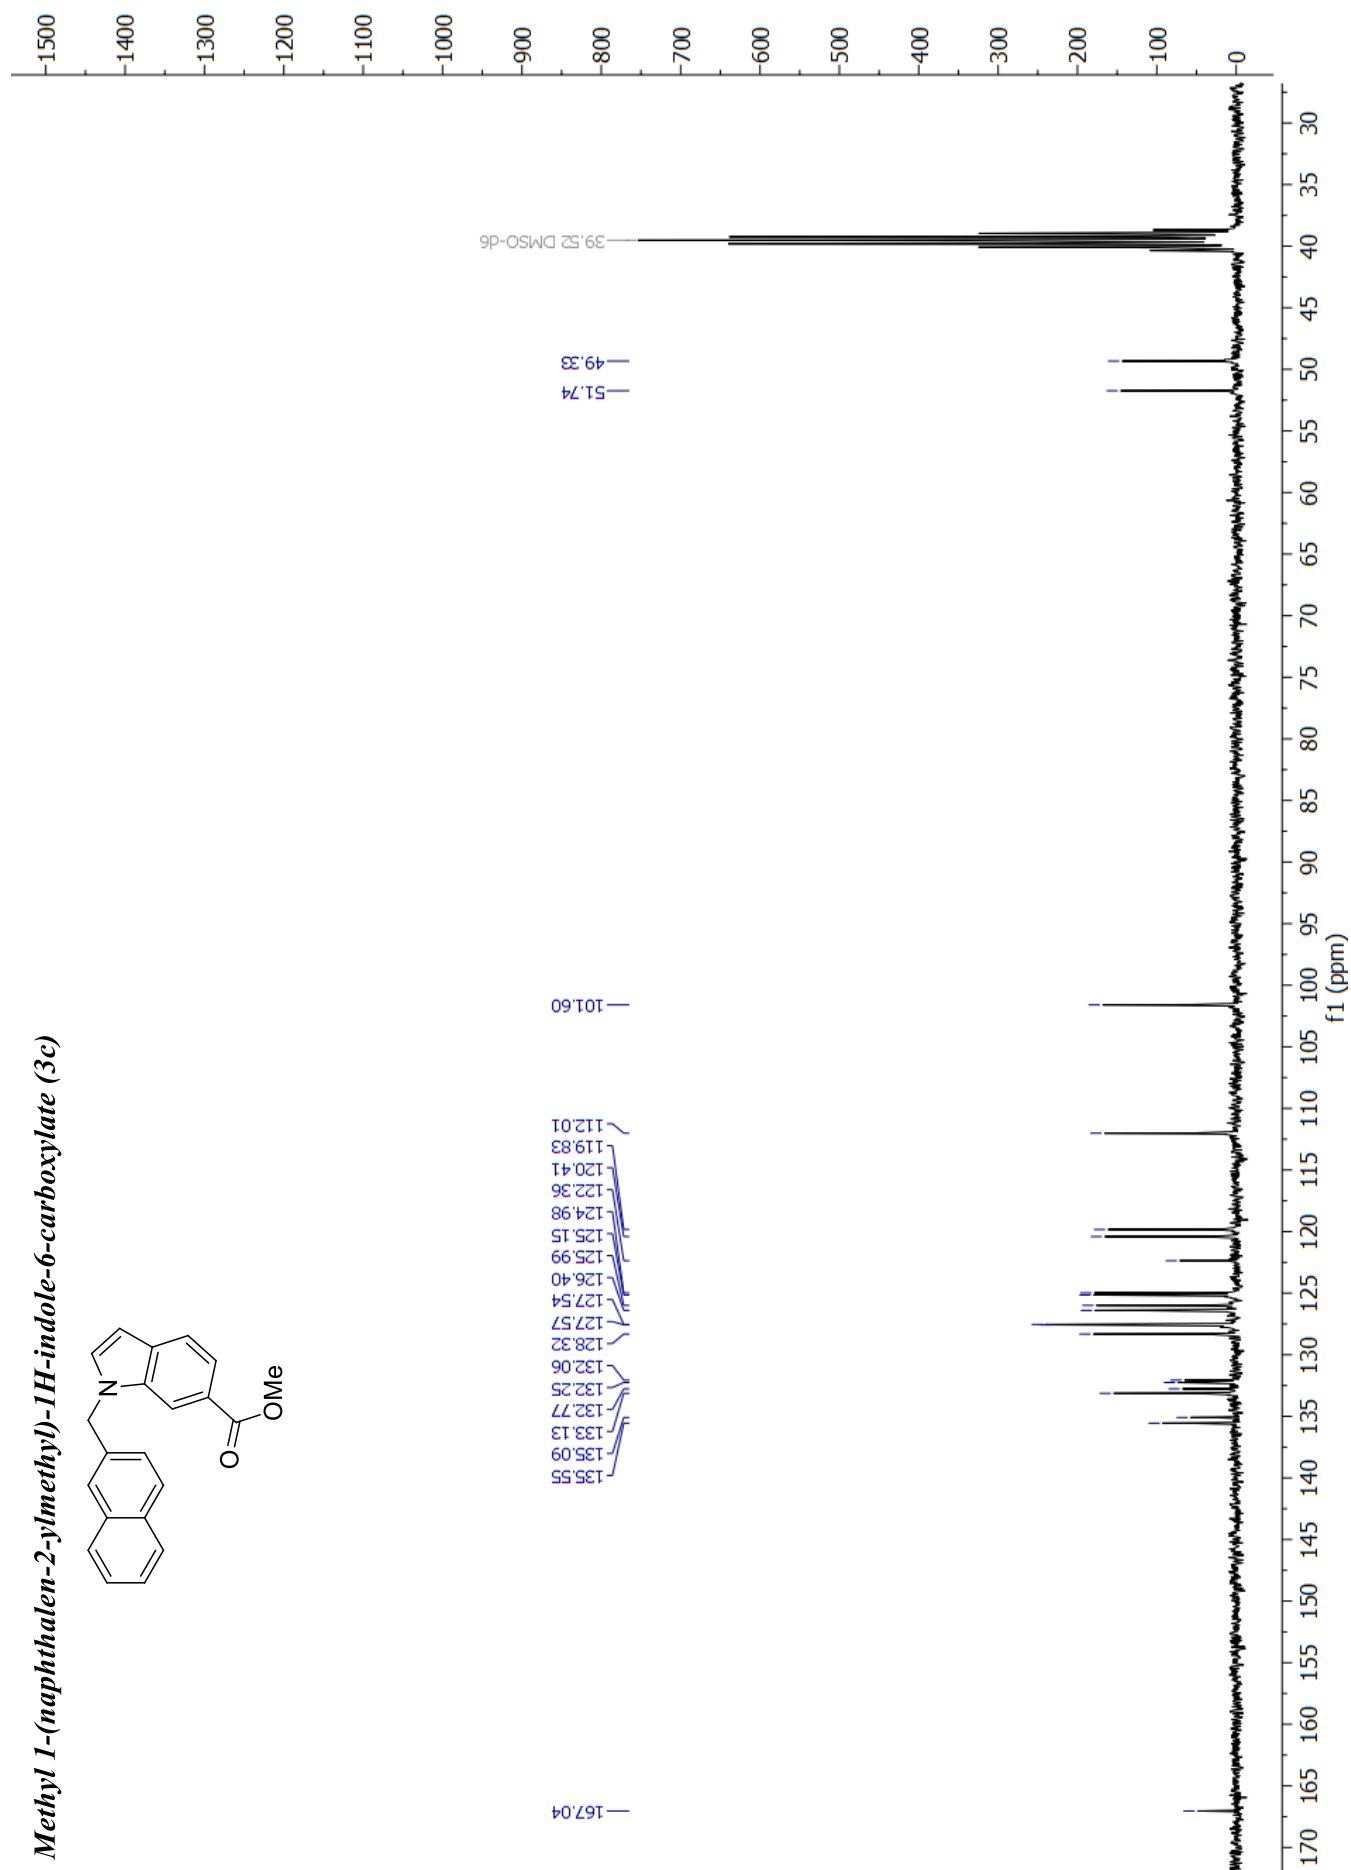

CCOC(=O)c1ccccc1CNc2ccc3ccccc3c2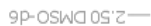

**Ethyl 1-(naphthalen-1-ylmethyl)-1H-pyrrole-2-carboxylate (5c)**

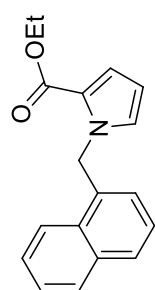

135.11  
133.01  
130.33  
129.91  
128.53  
127.39  
126.43  
126.01  
125.58  
122.78  
122.40  
121.79  
118.03

108.44

160.20

59.35

49.34

39.52 DMSO-d6

14.09

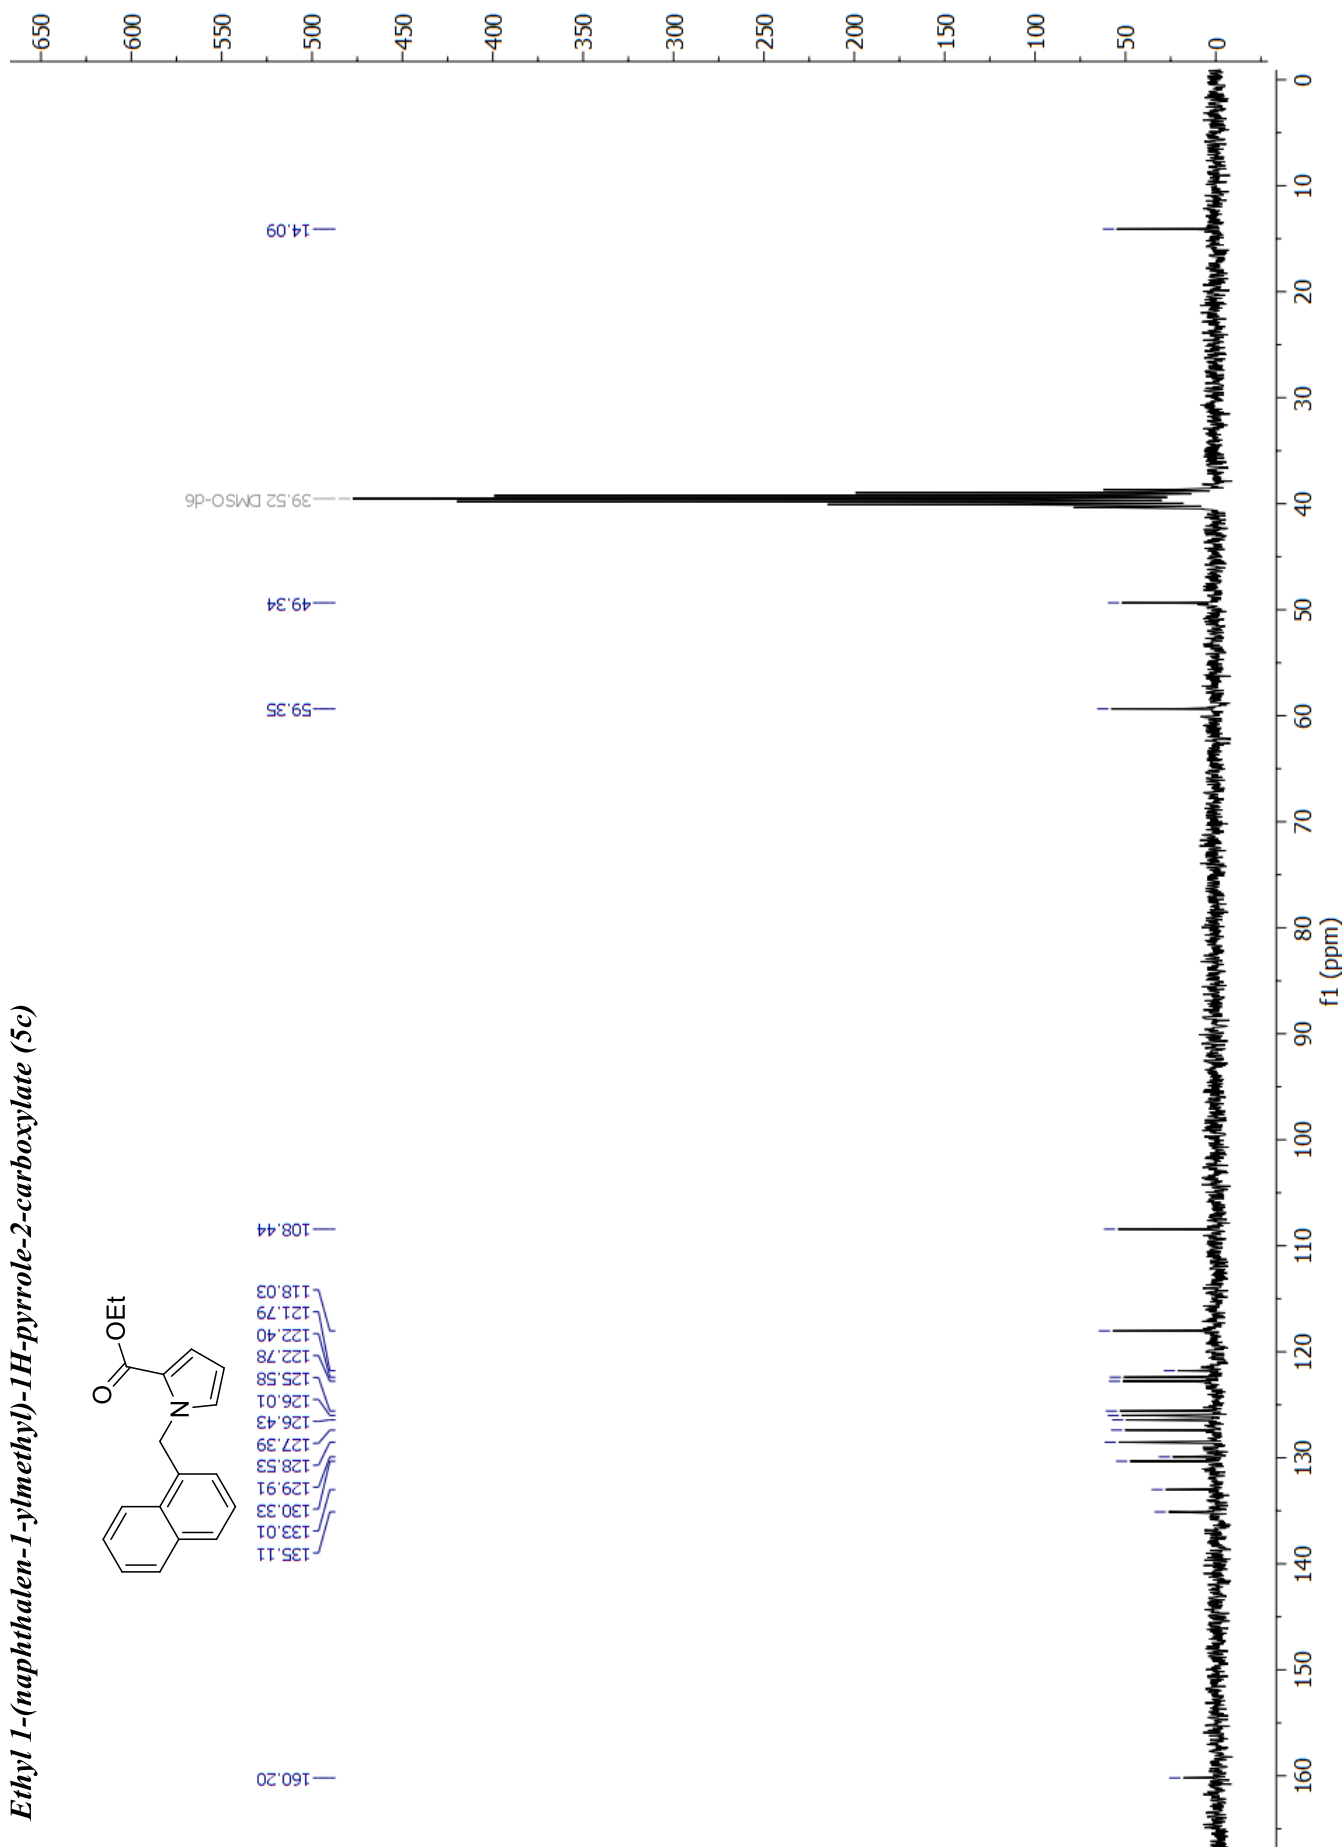



**Ethyl 1-(naphthalen-2-ylmethyl)-1H-pyrrole-2-carboxylate (5d)**

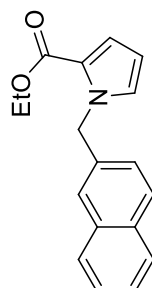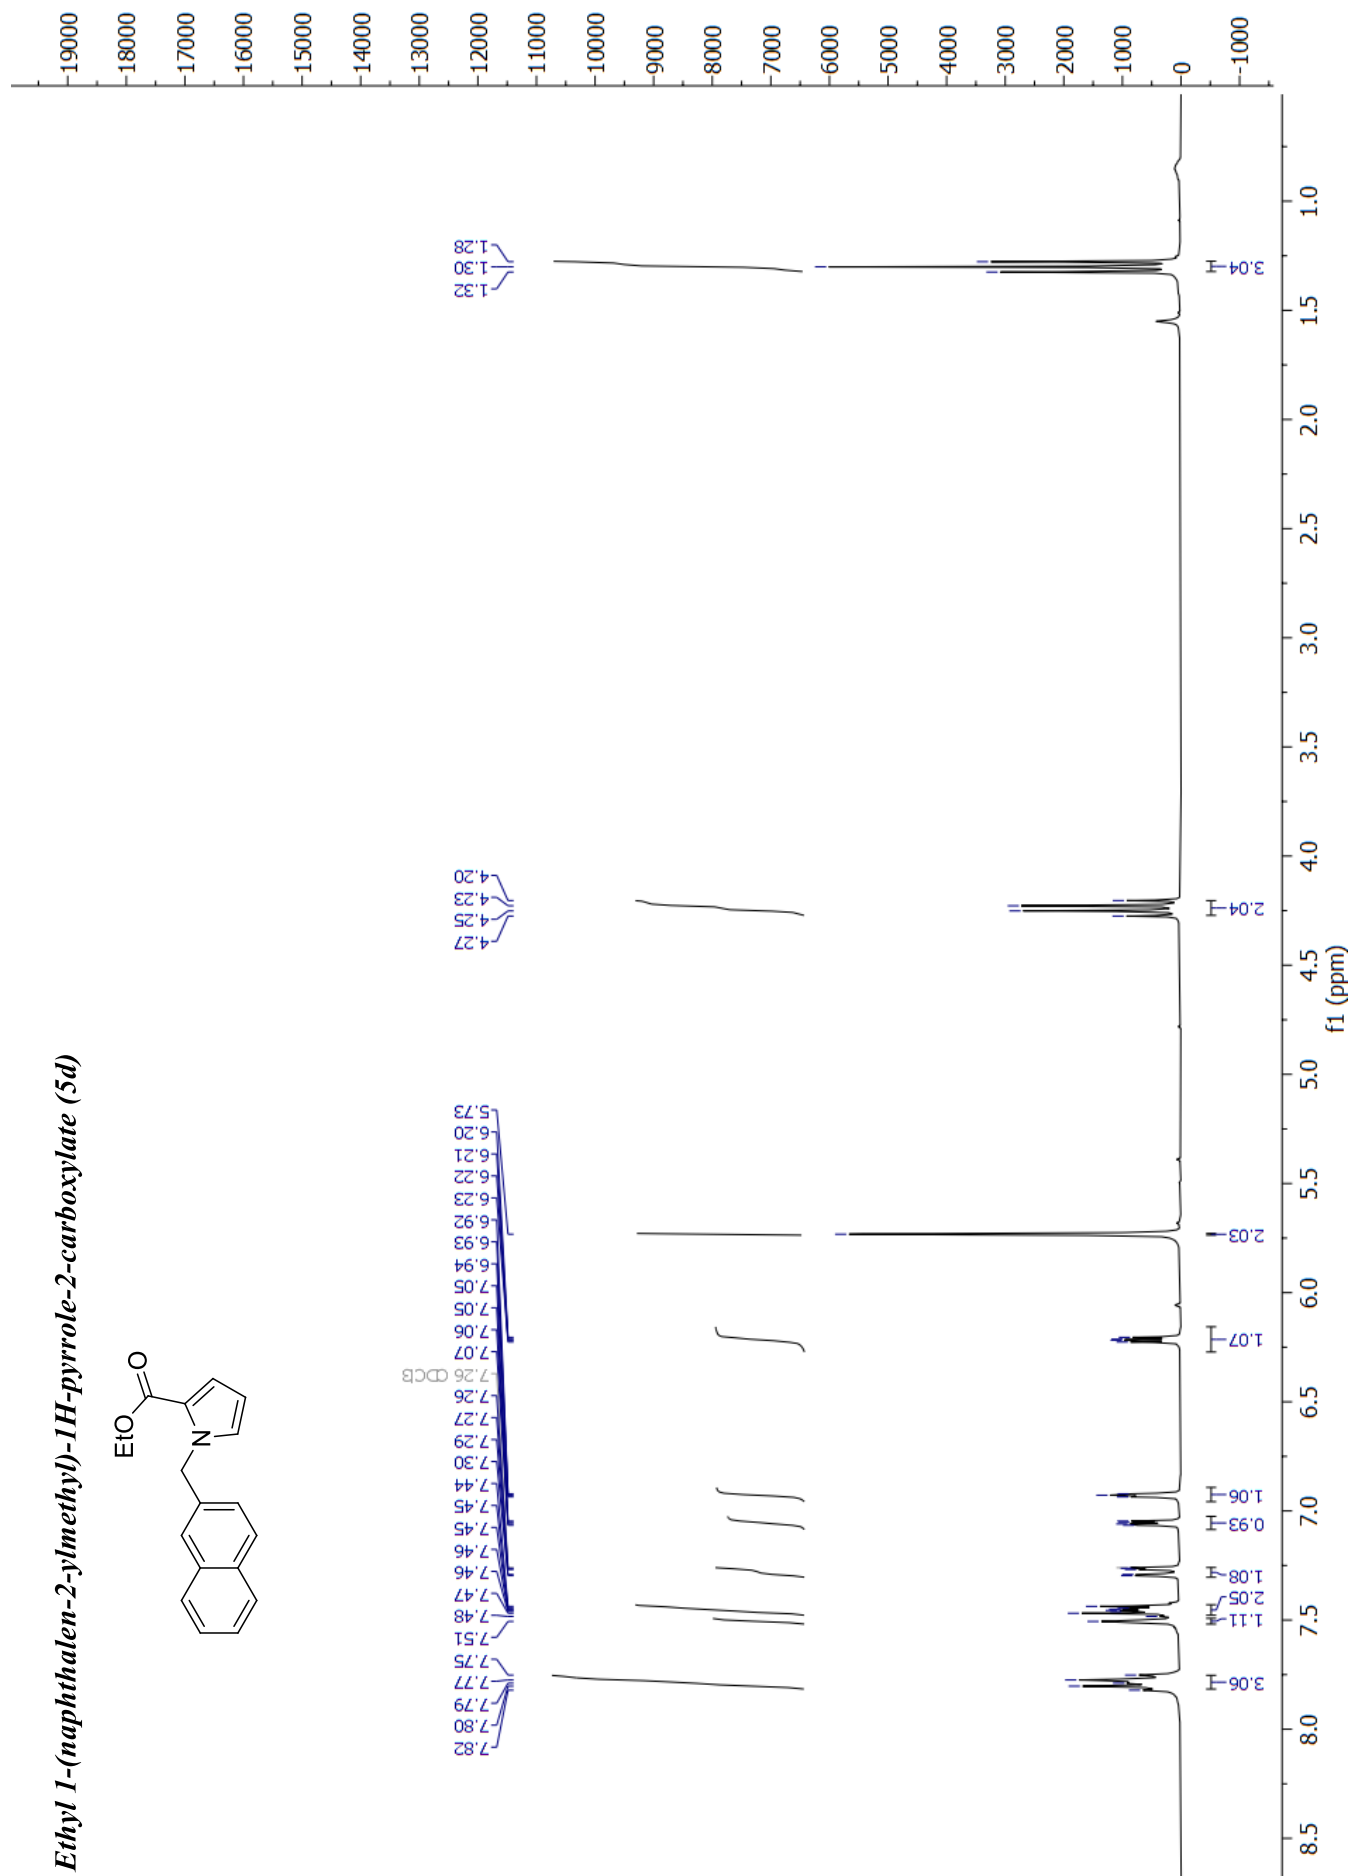

**Ethyl 1-(naphthalen-2-ylmethyl)-1H-pyrrole-2-carboxylate (5d)**

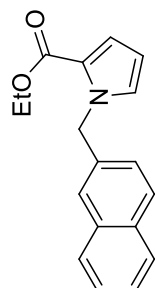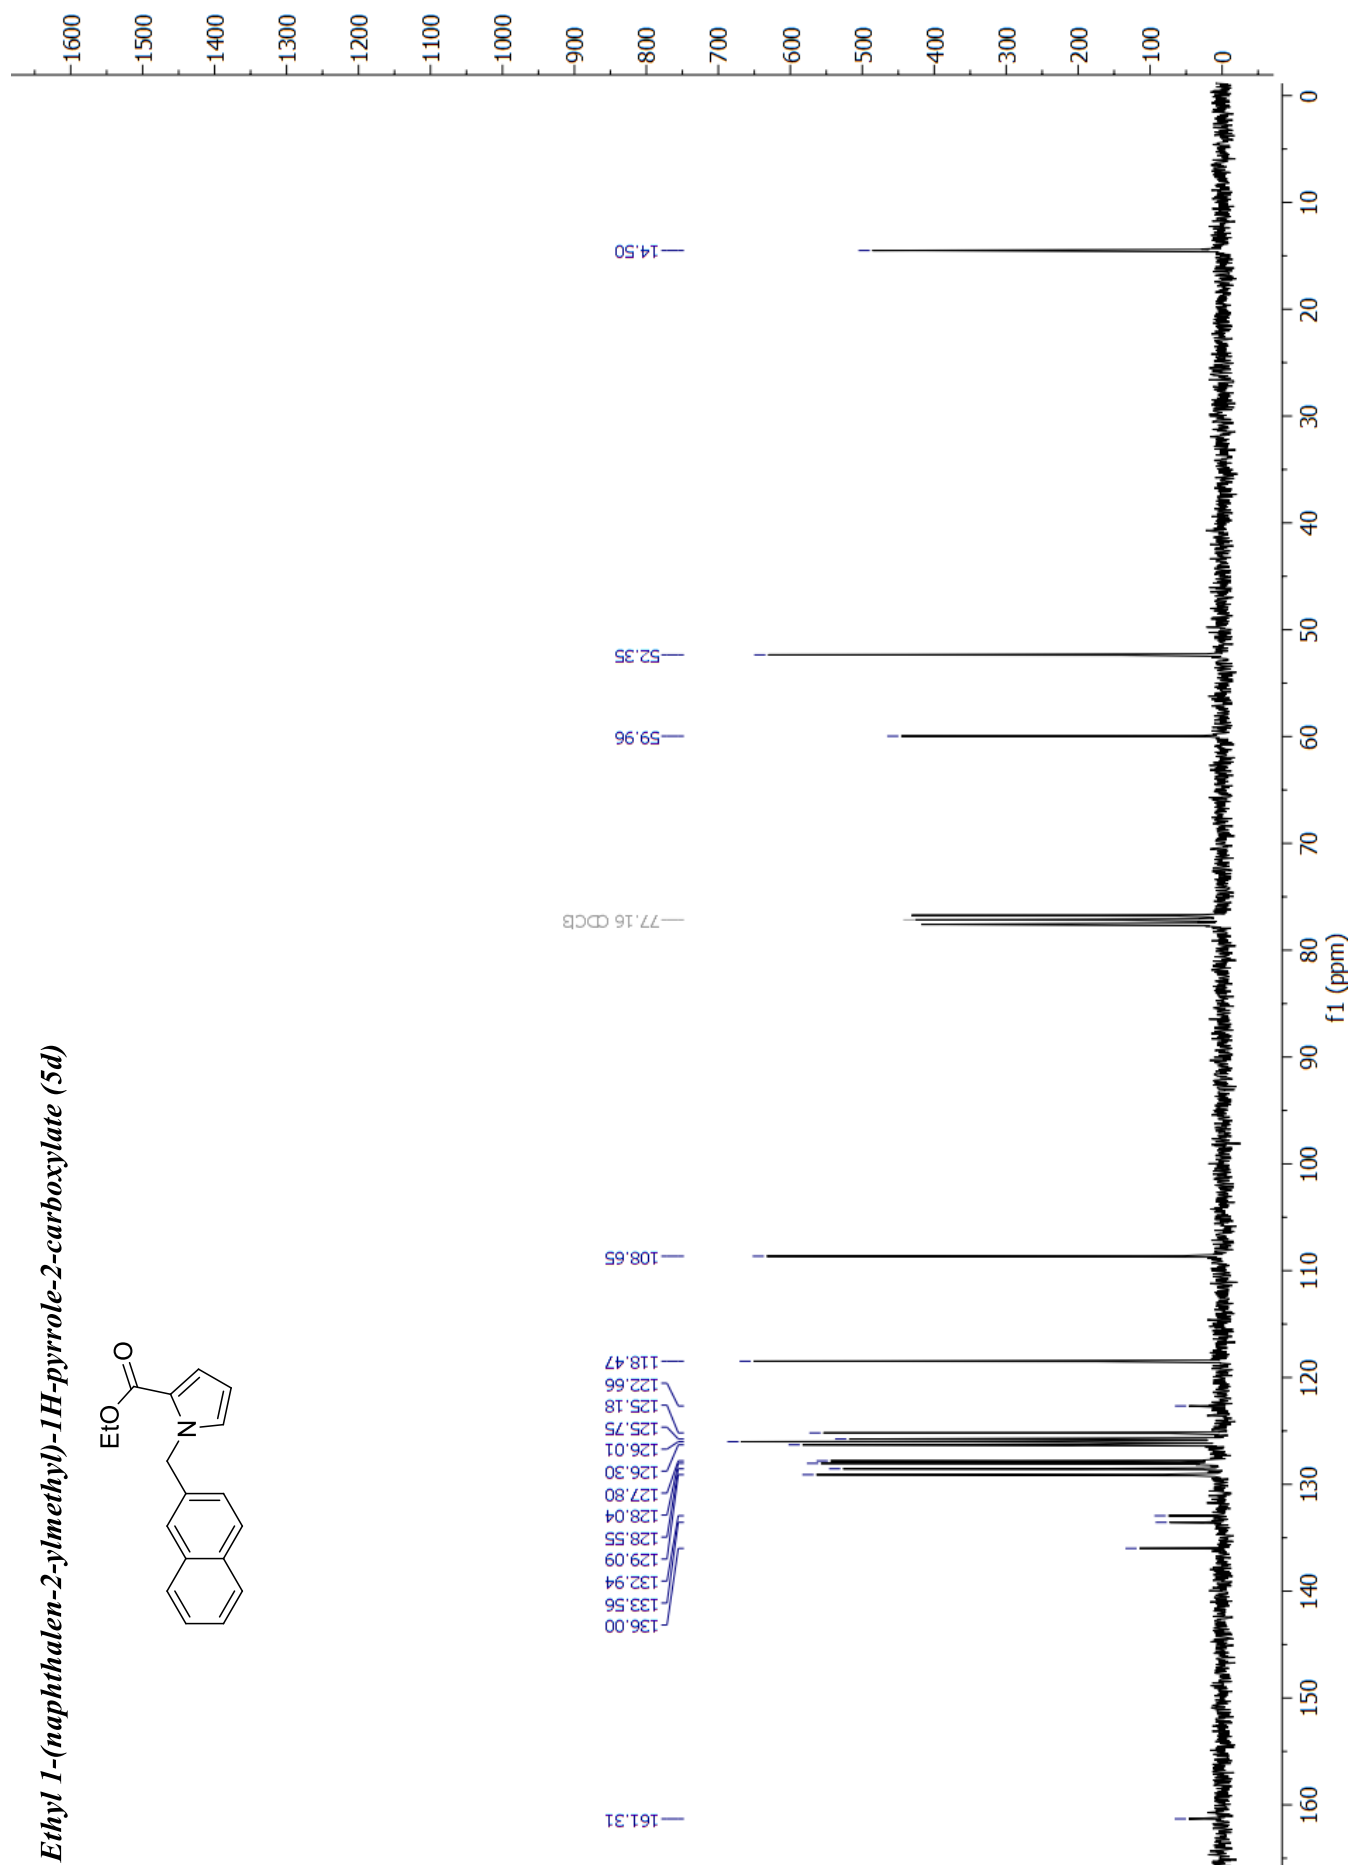

*1-(naphthalen-1-ylmethyl)-1H-indole-2-carboxylic acid (2a)*

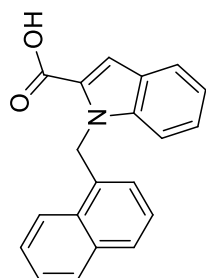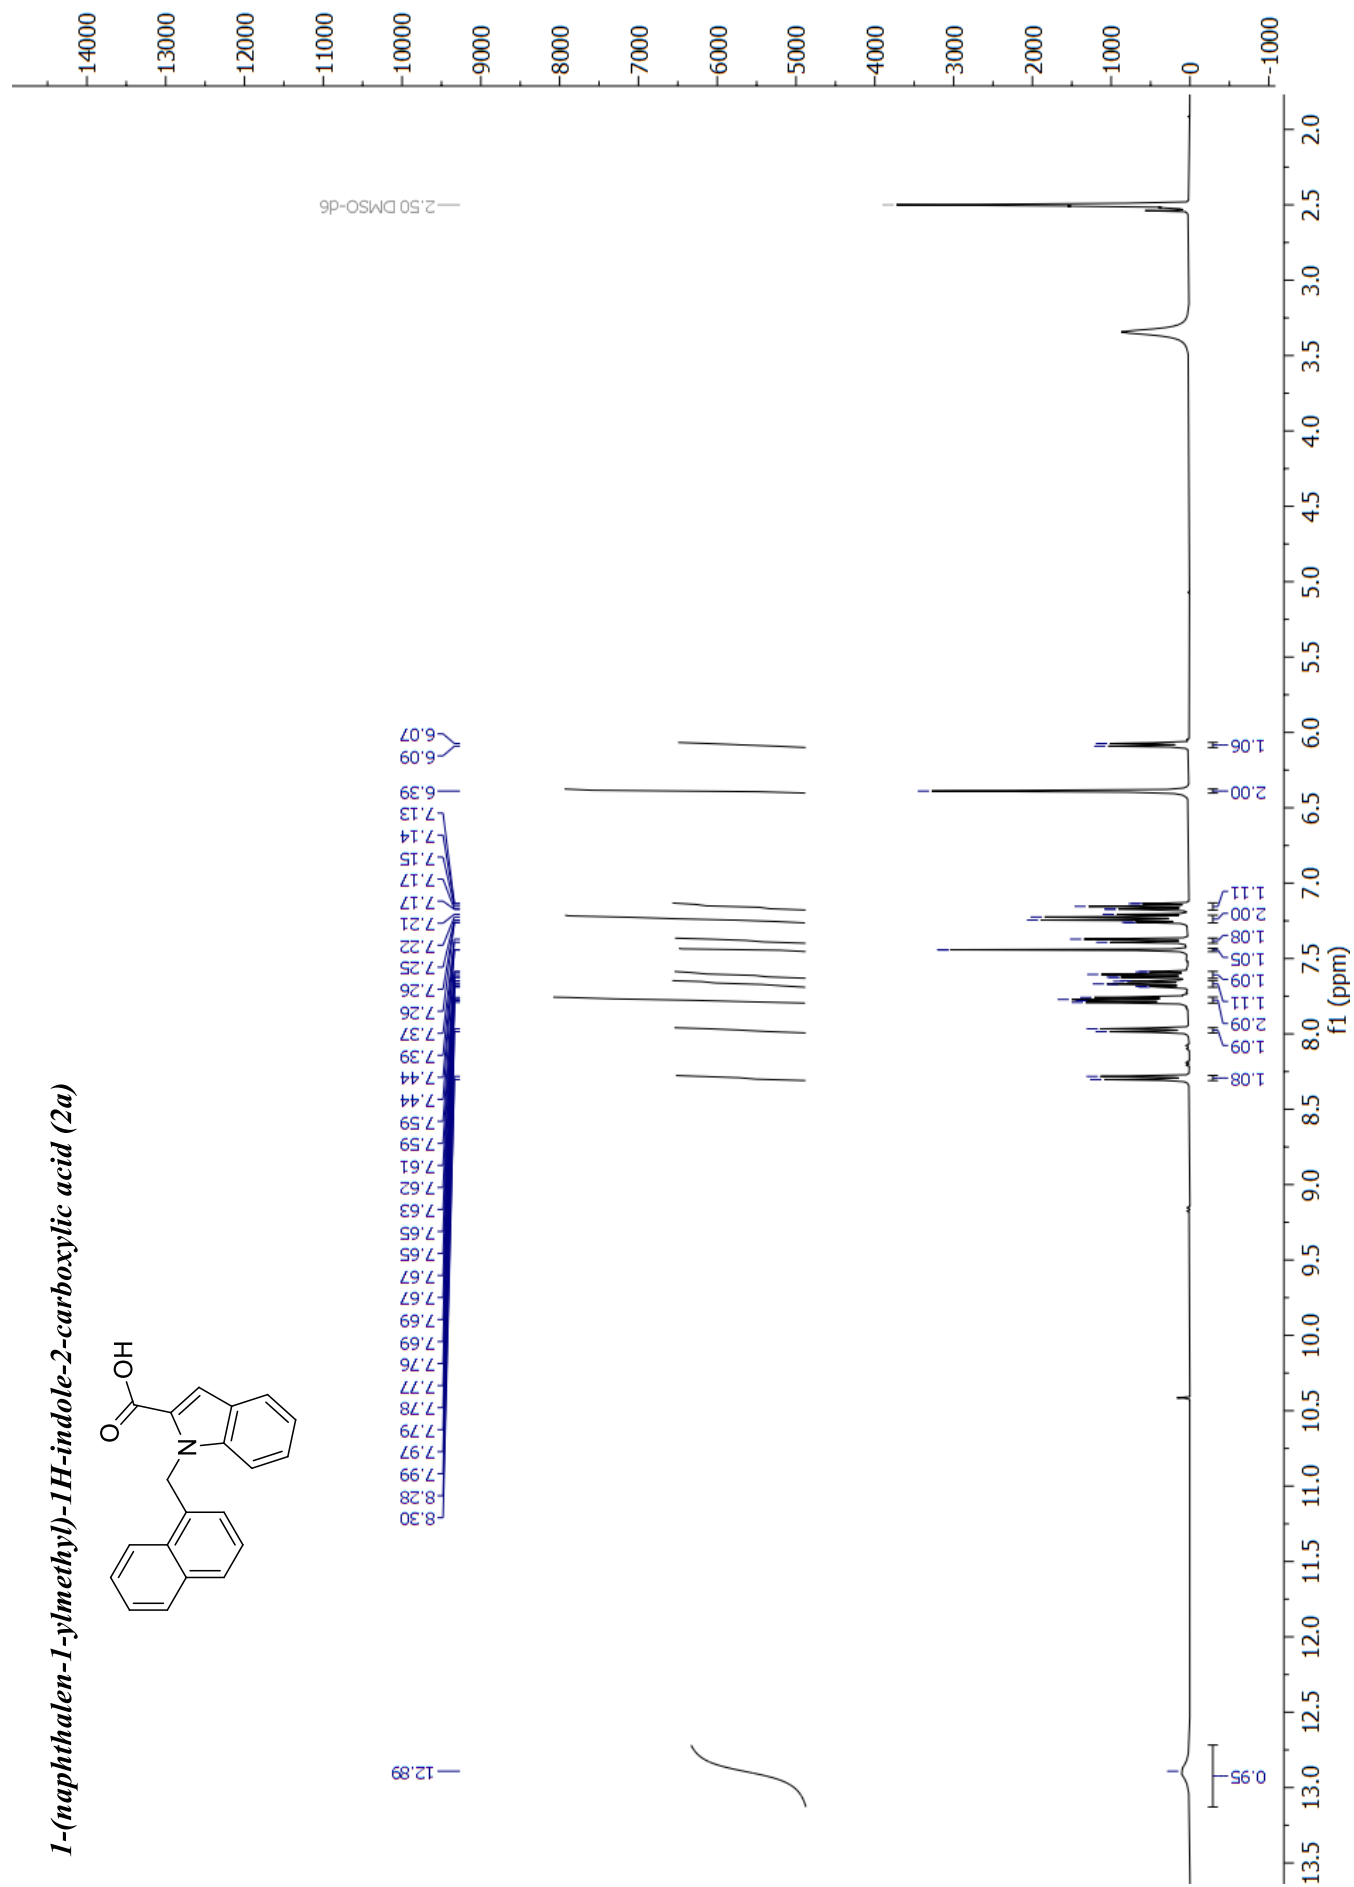

**1-(naphthalen-1-ylmethyl)-1H-indole-2-carboxylic acid (2a)**

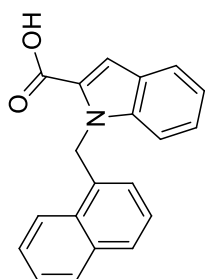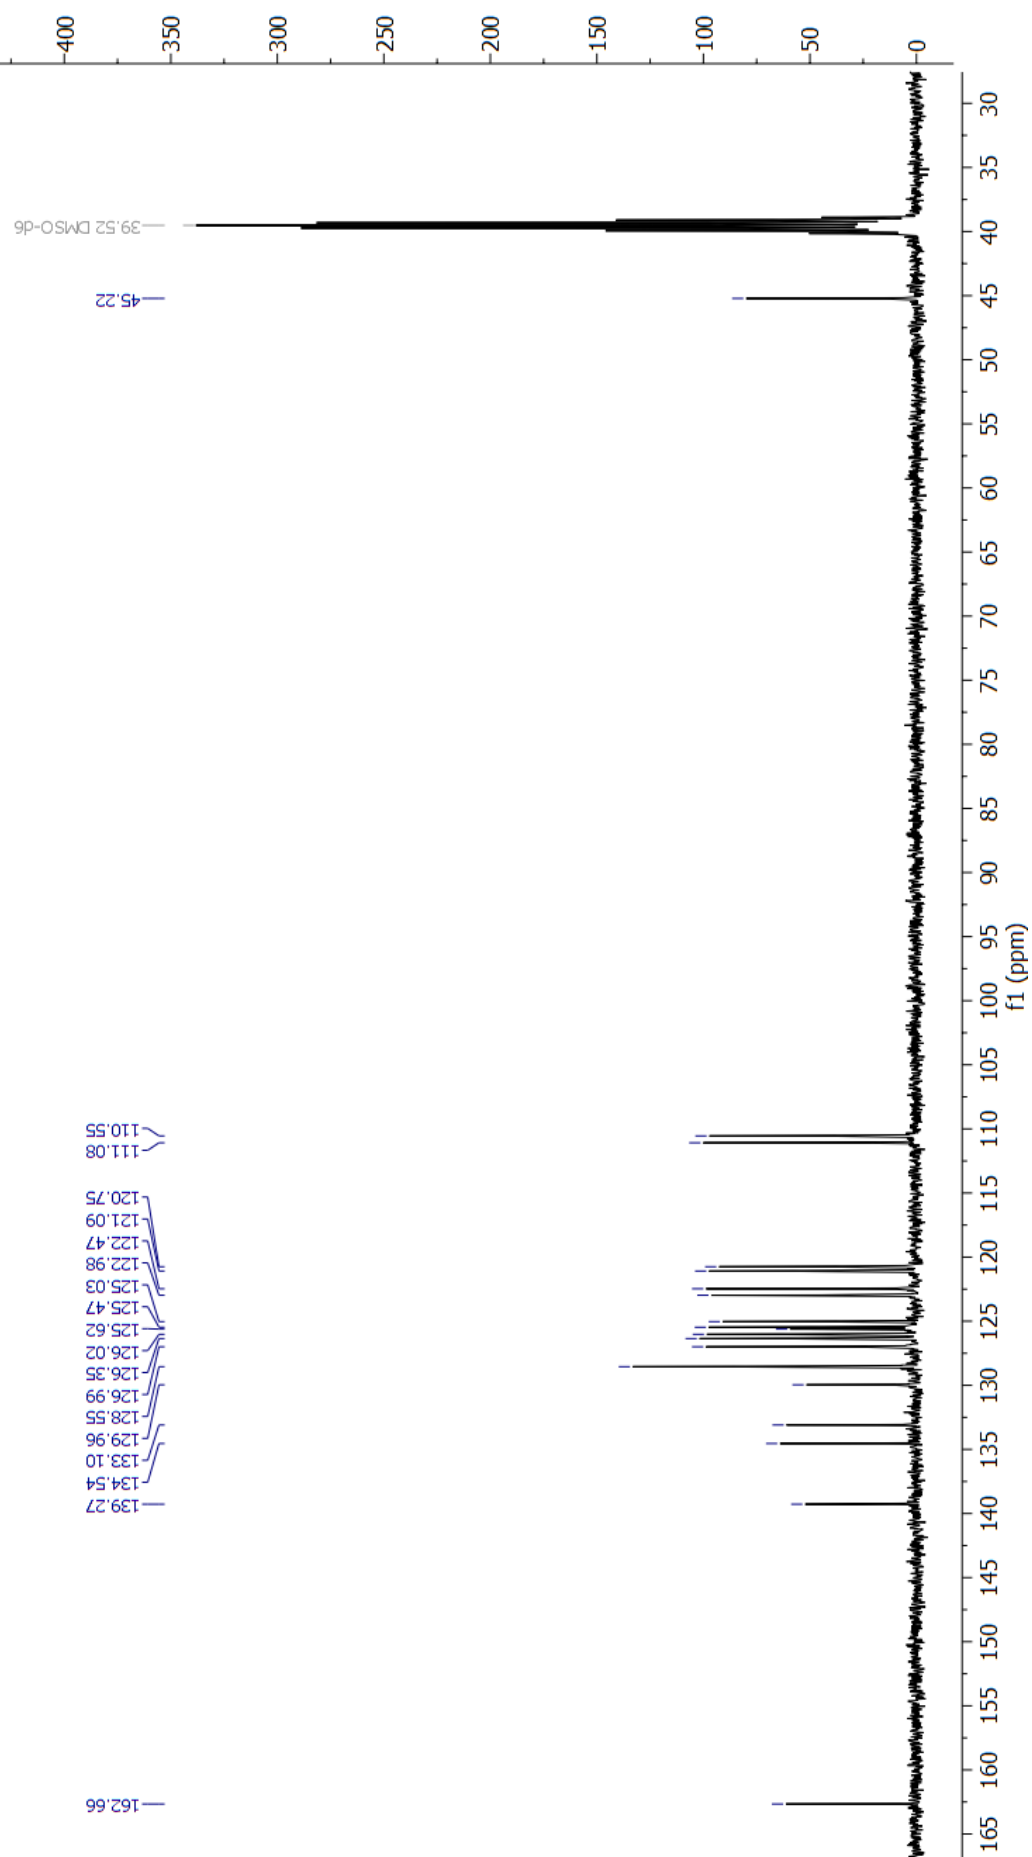

**1-(naphthalen-2-ylmethyl)-1H-indole-2-carboxylic acid (2b)**

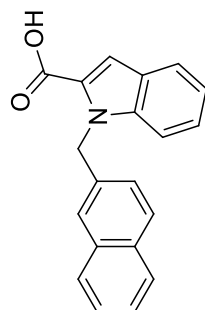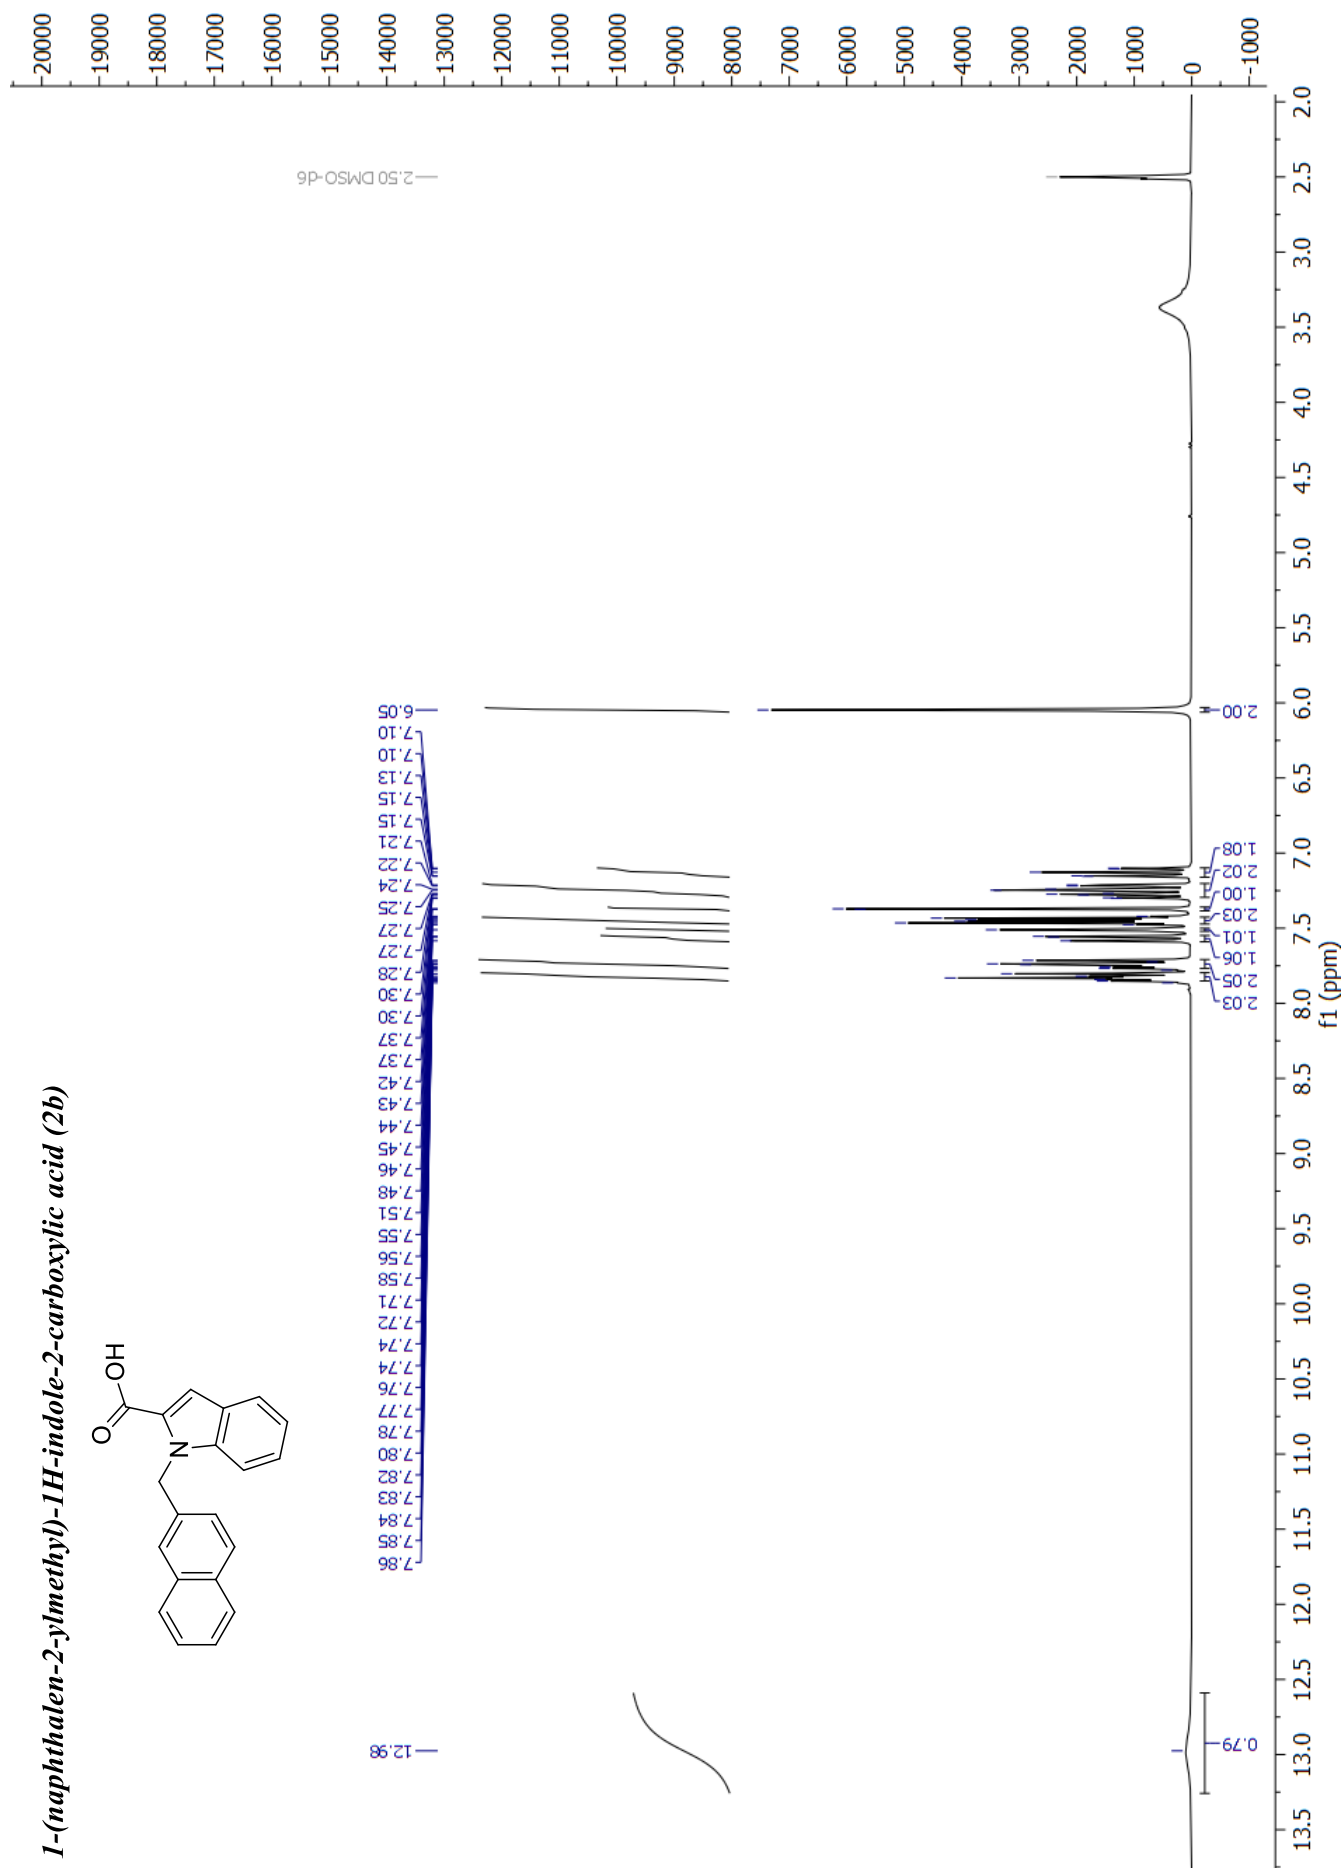

**1-(naphthalen-2-ylmethyl)-1H-indole-2-carboxylic acid (2b)**

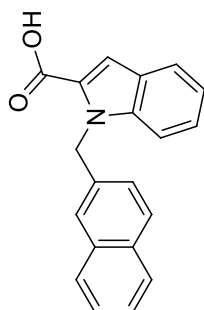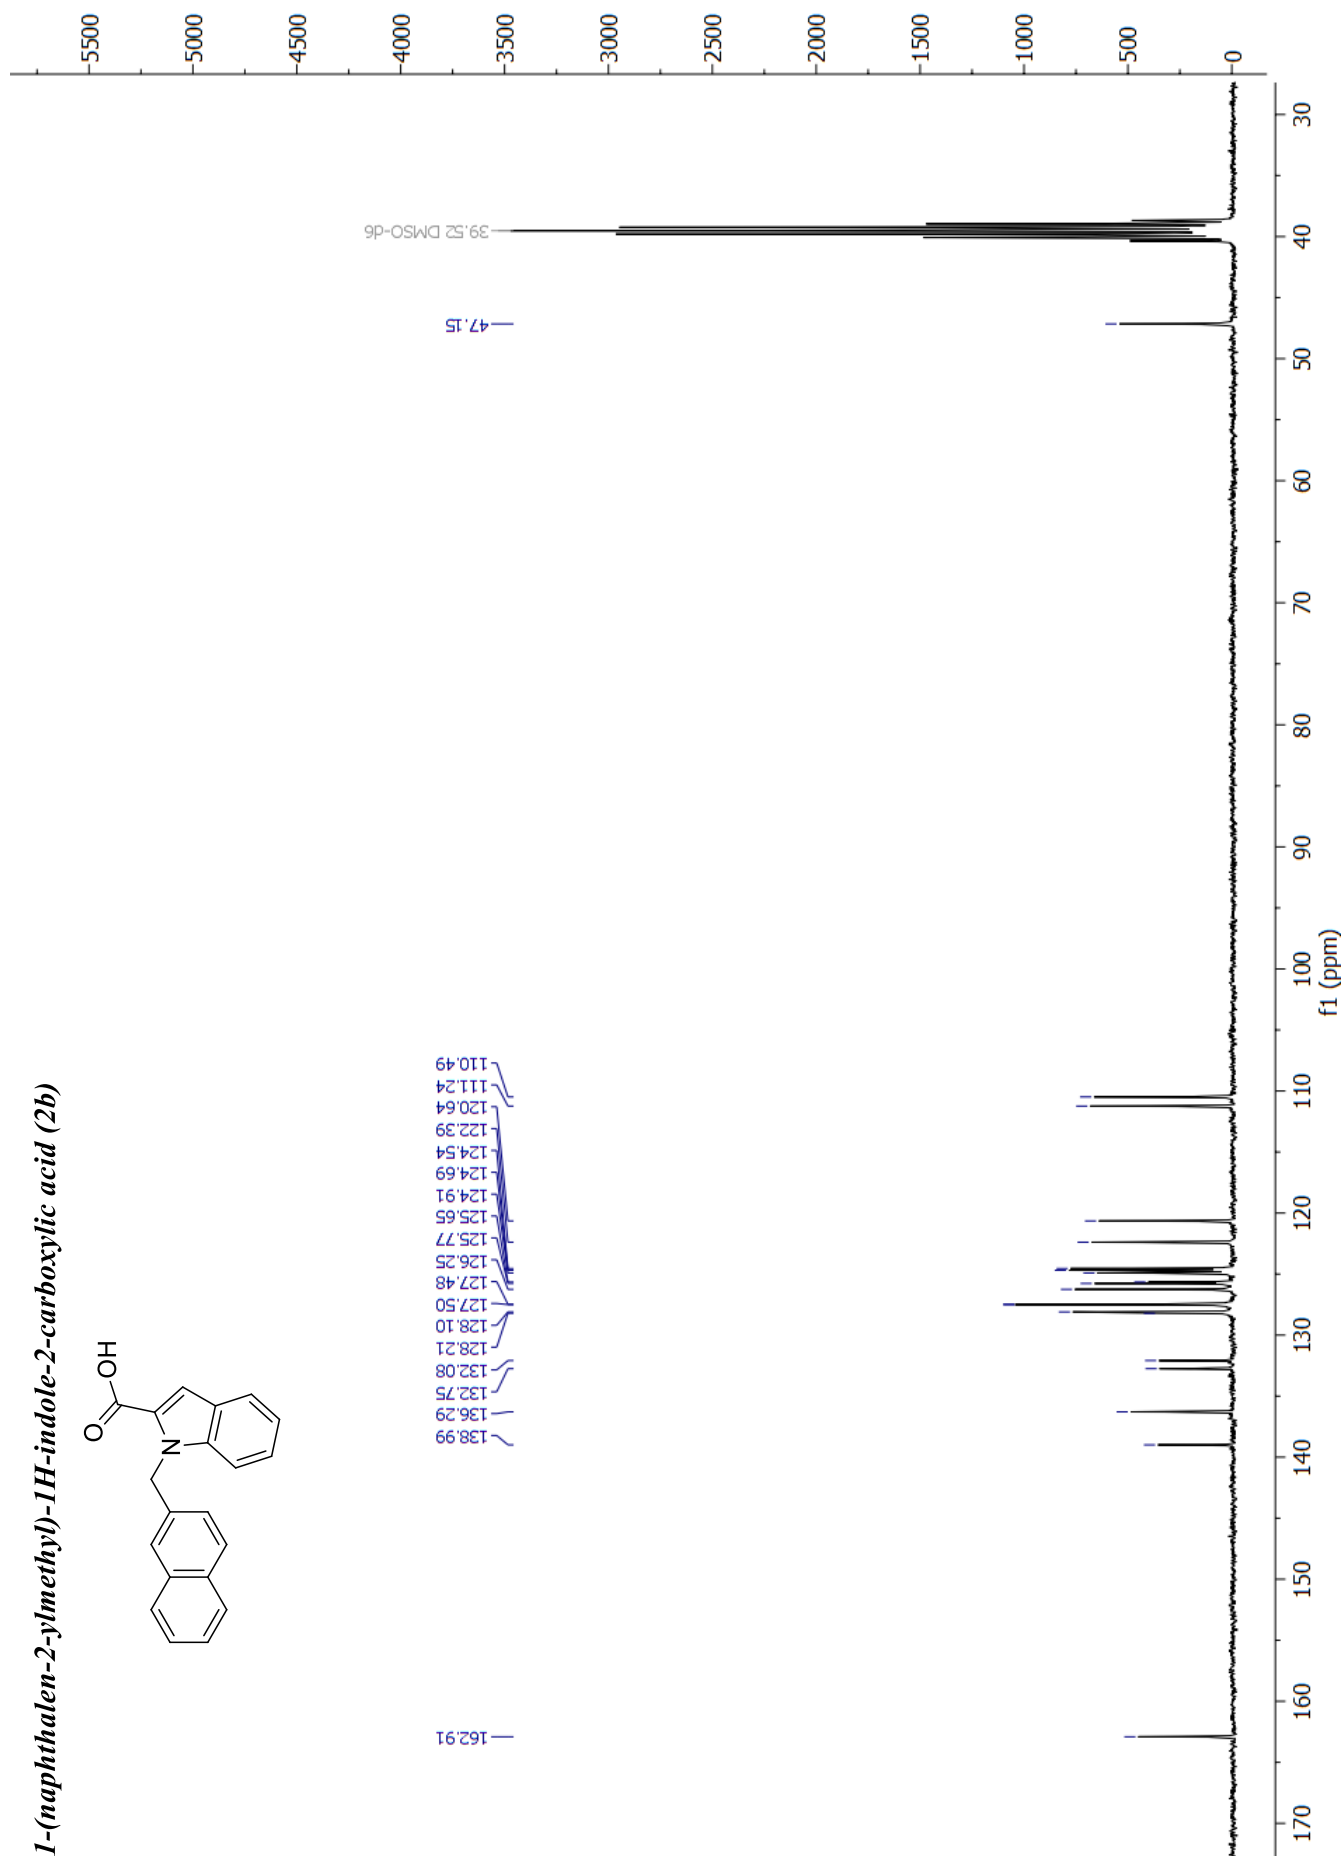

**1-(naphthalen-2-ylmethyl)-1H-indole-6-carboxylic acid (3b)**

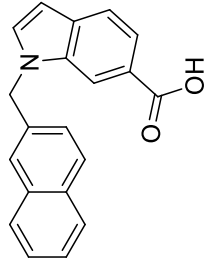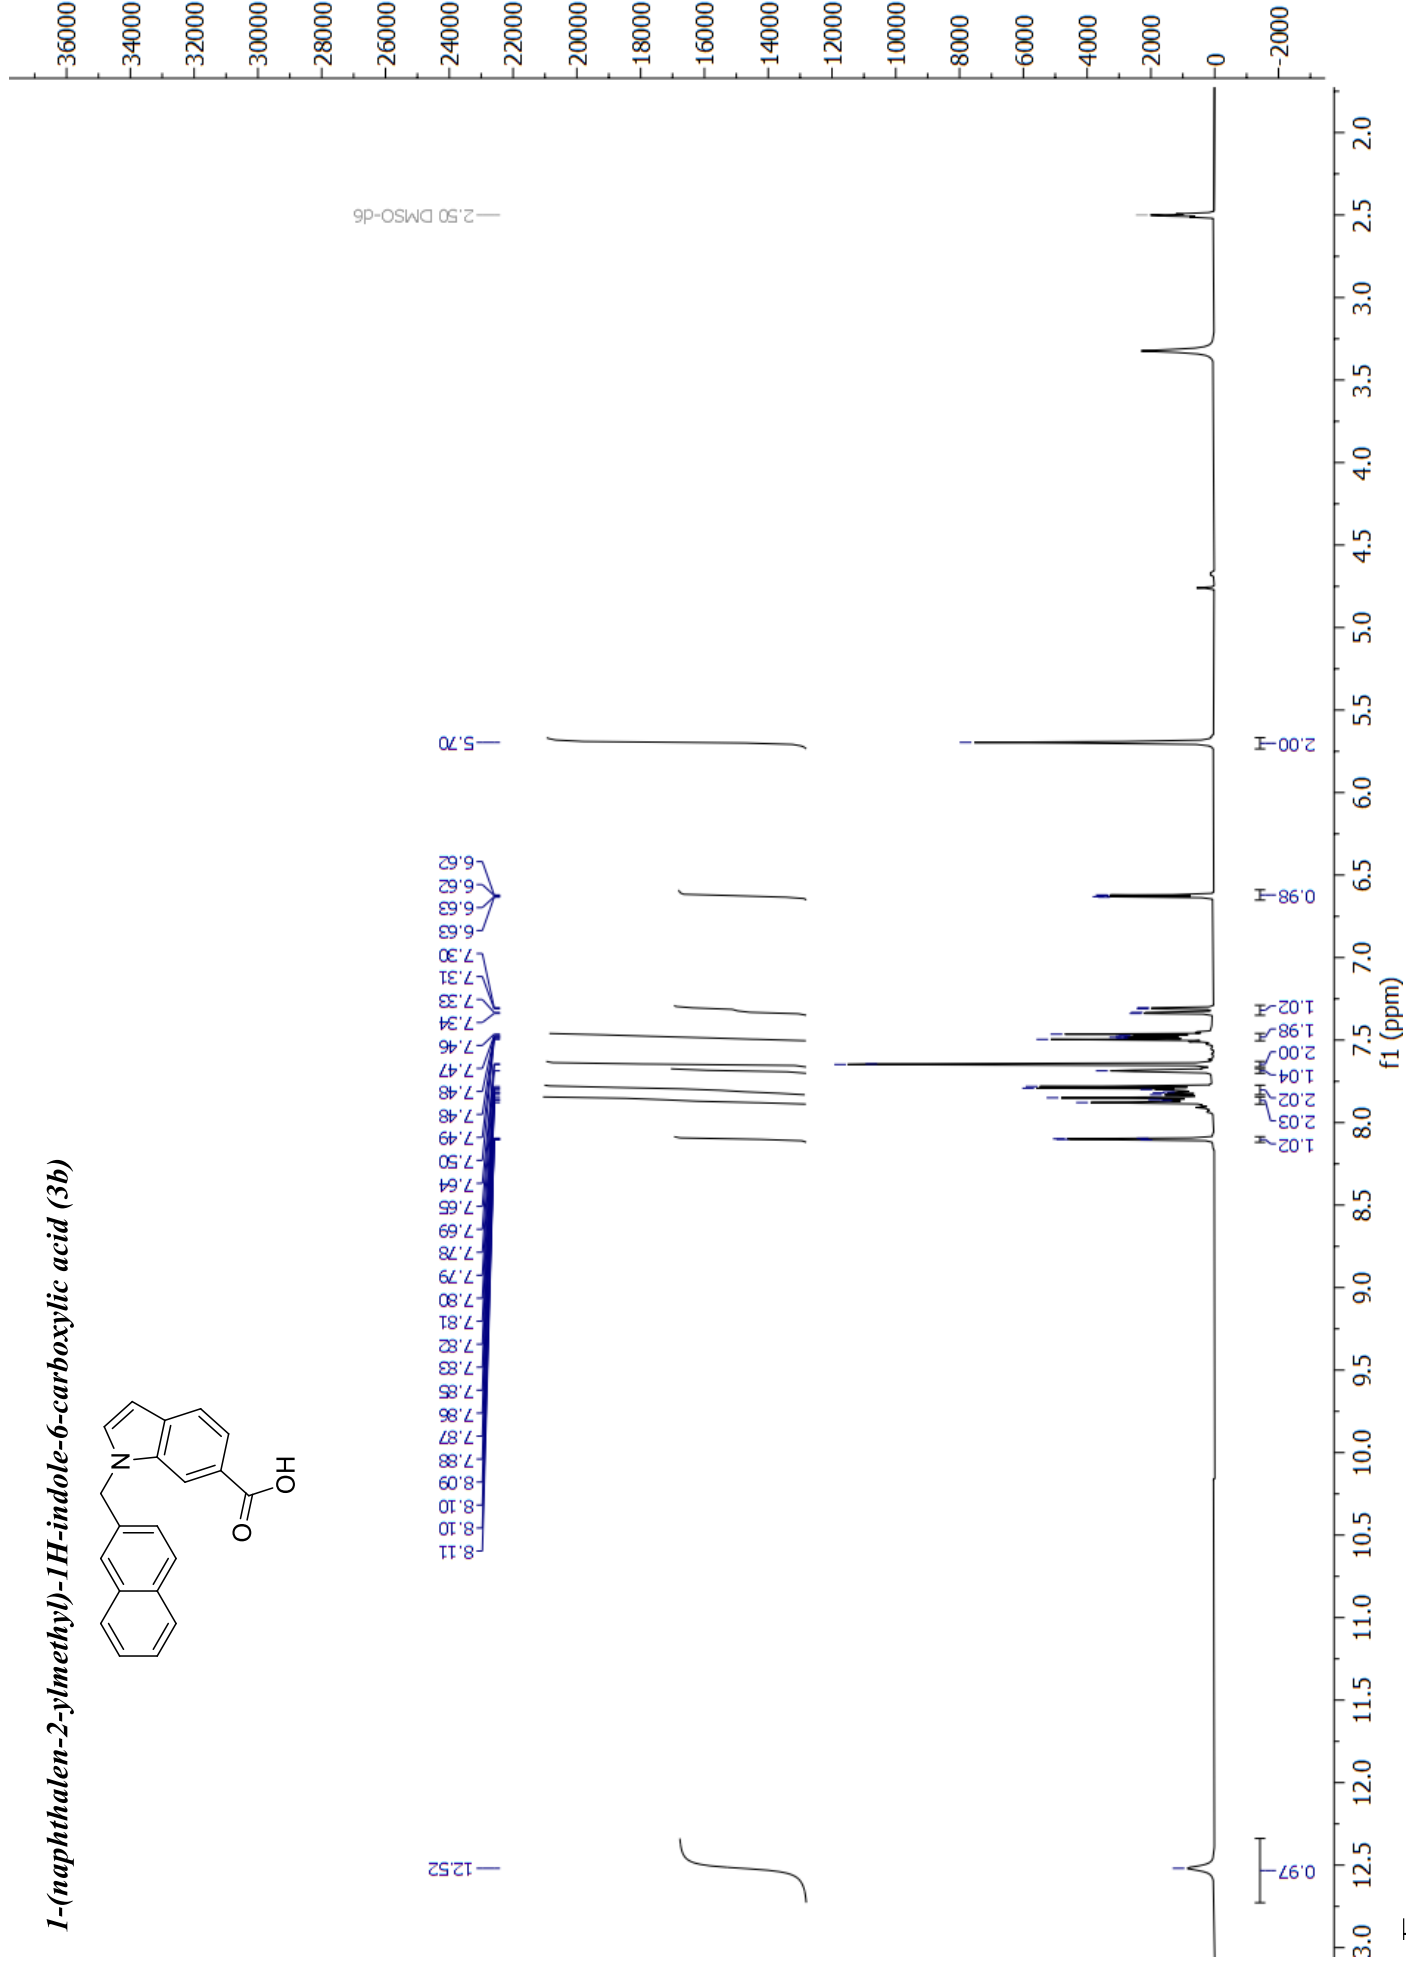

*1-(naphthalen-2-ylmethyl)-1H-indole-6-carboxylic acid (3b)*

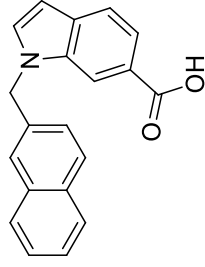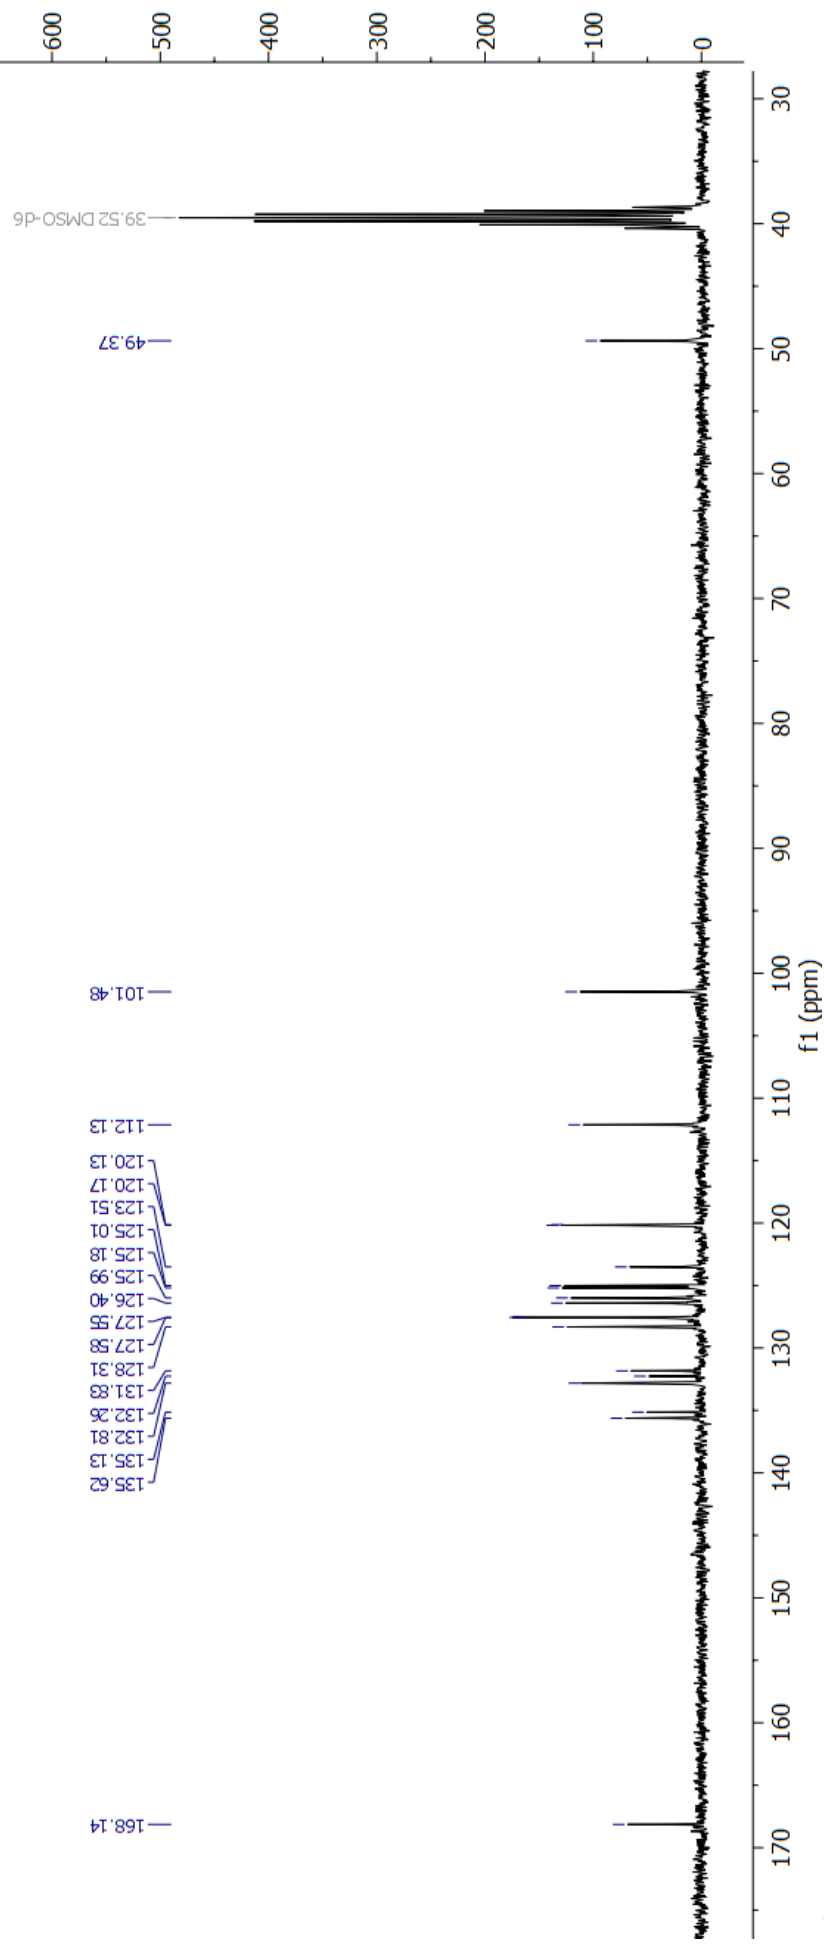



**1-(naphthalen-1-ylmethyl)-1H-pyrrole-2-carboxylic acid (5a)**

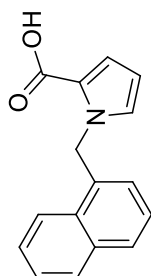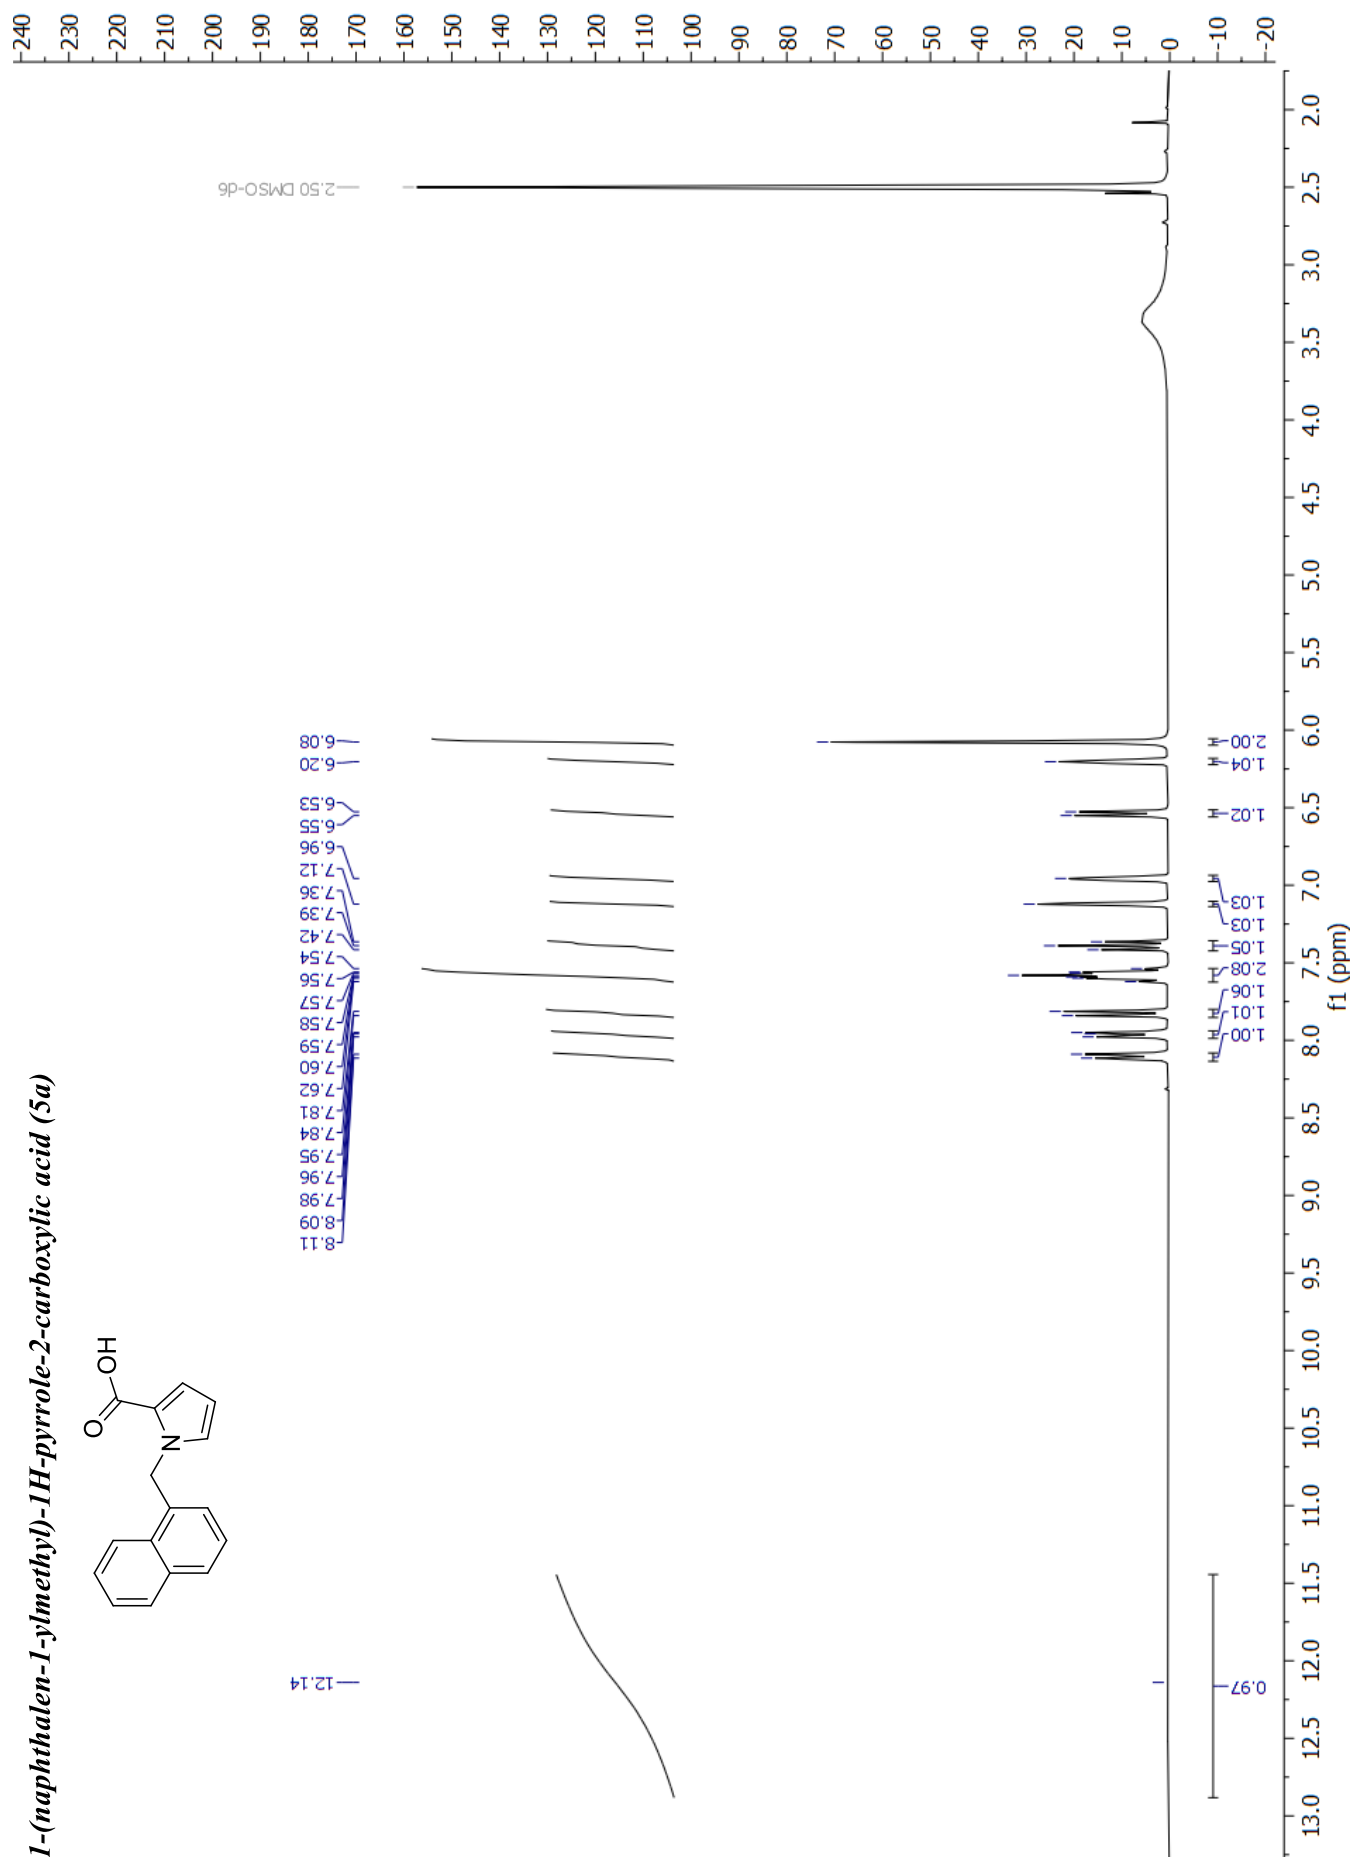

**1-(naphthalen-1-ylmethyl)-1H-pyrrole-2-carboxylic acid (5a)**

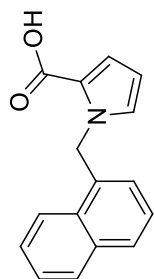

161.84  
135.28  
133.02  
130.01  
129.74  
128.53  
127.38  
126.41  
125.98  
125.61  
122.88  
122.69  
117.88  
108.19

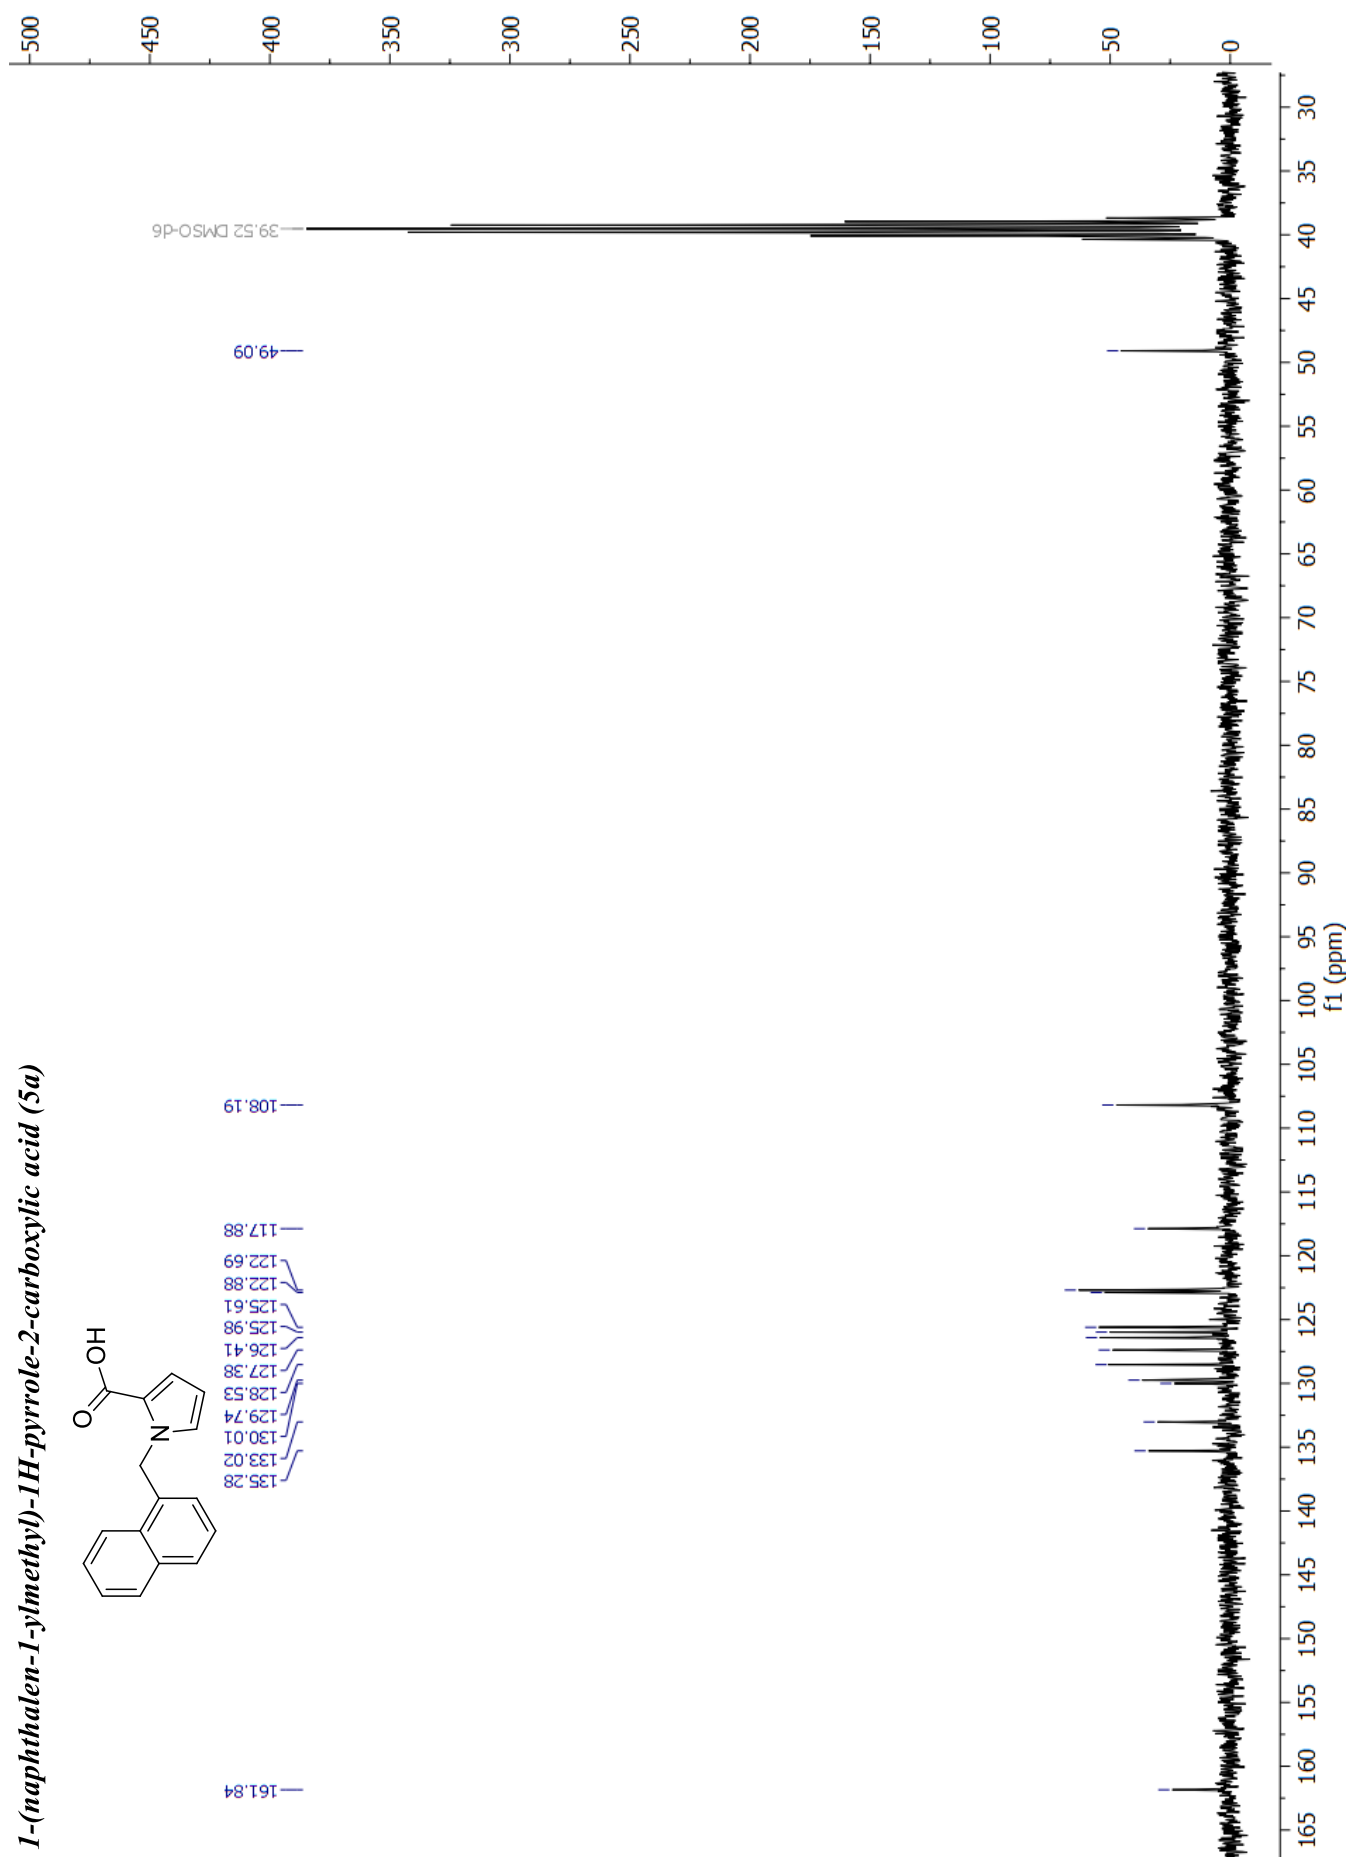

**1-(naphthalen-2-ylmethyl)-1H-pyrrole-2-carboxylic acid (5b)**

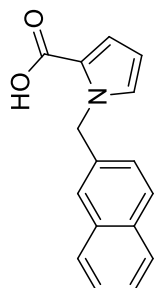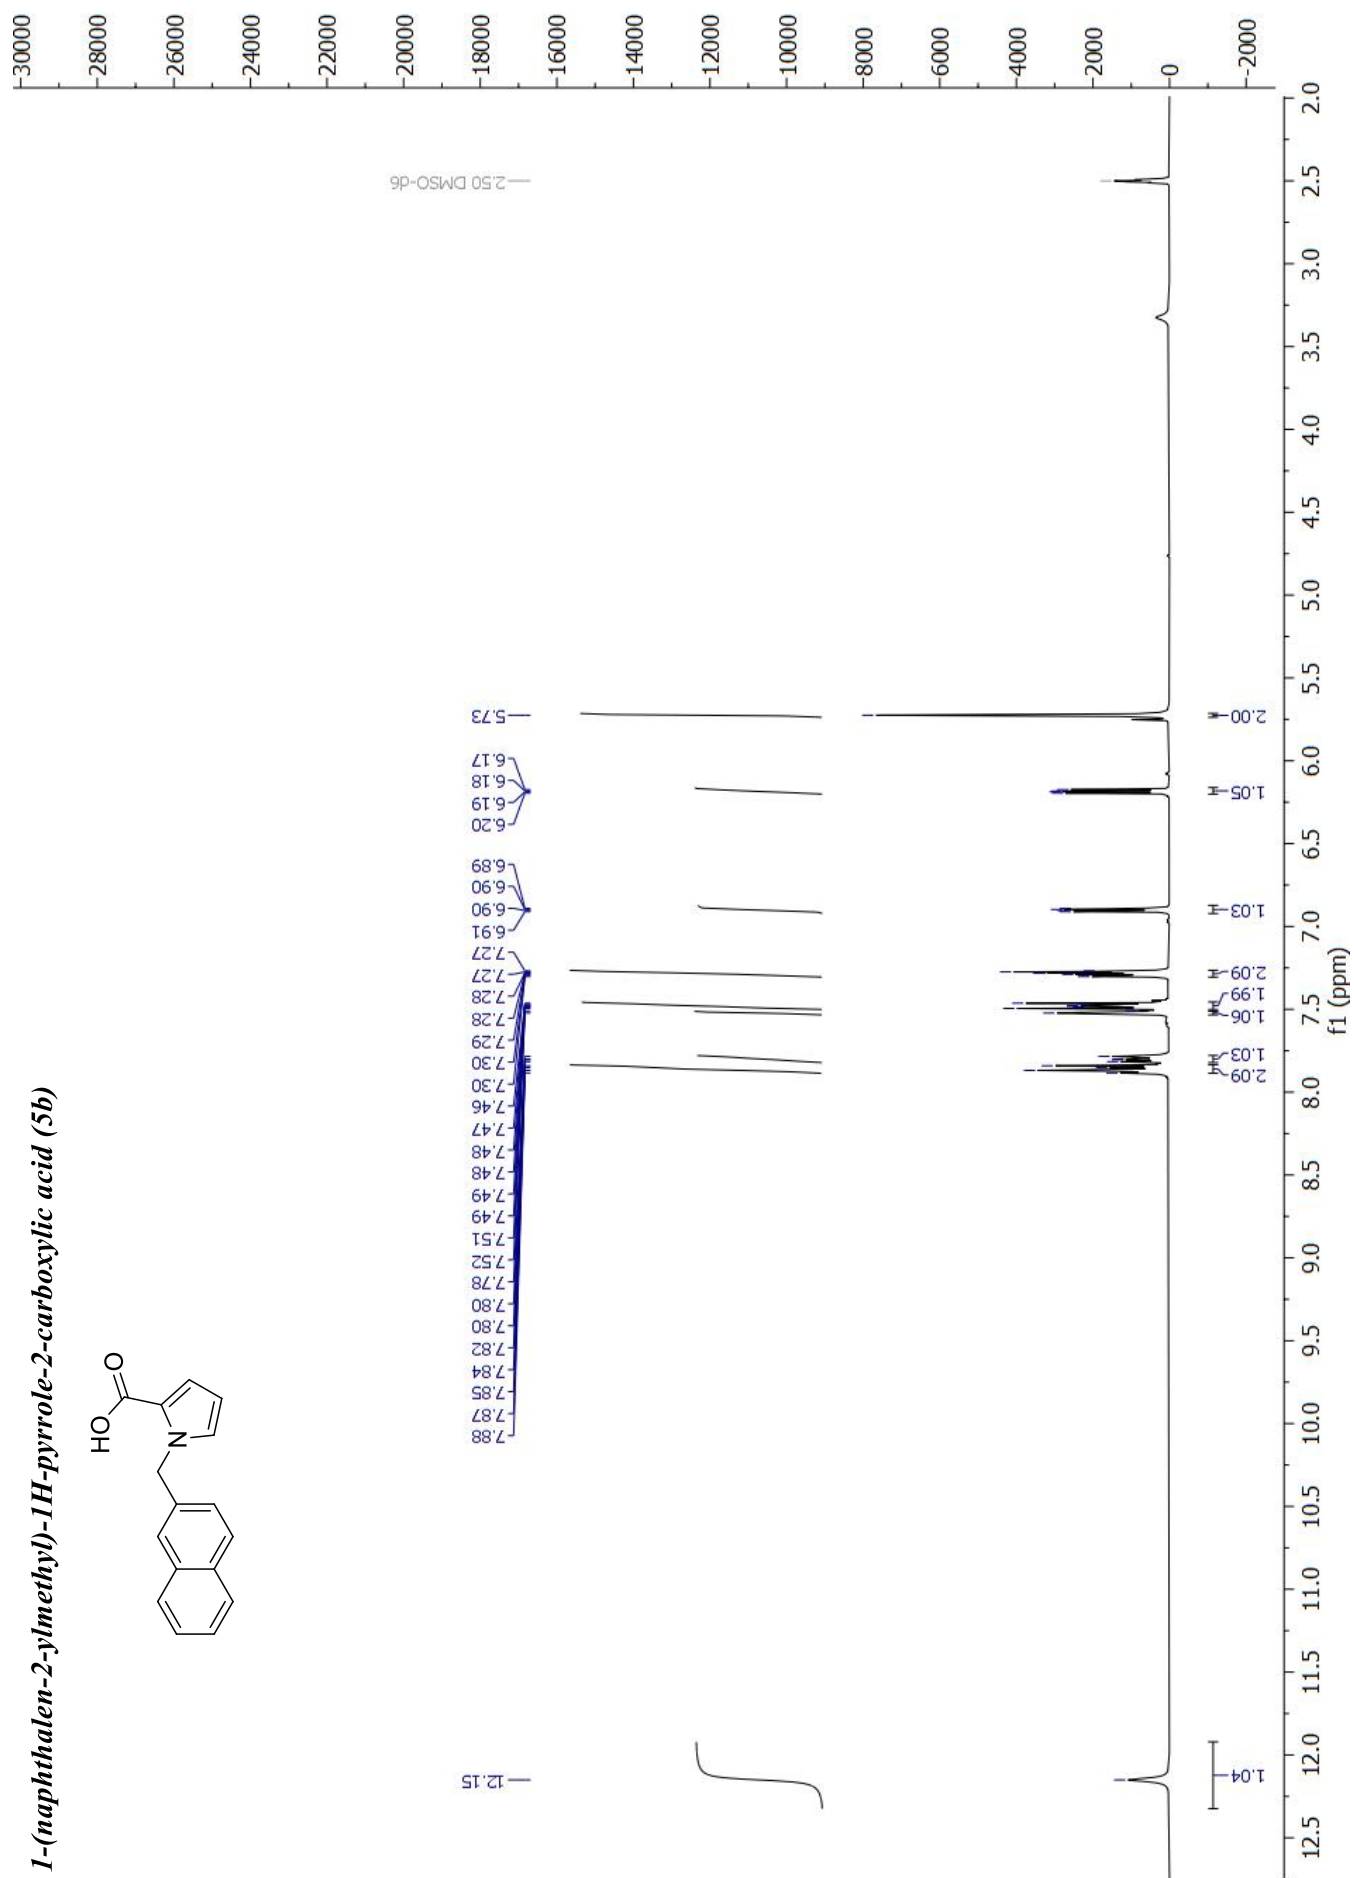

**1-(naphthalen-2-ylmethyl)-1H-pyrrole-2-carboxylic acid (5b)**

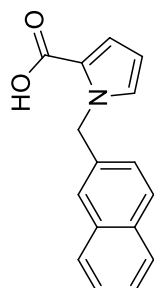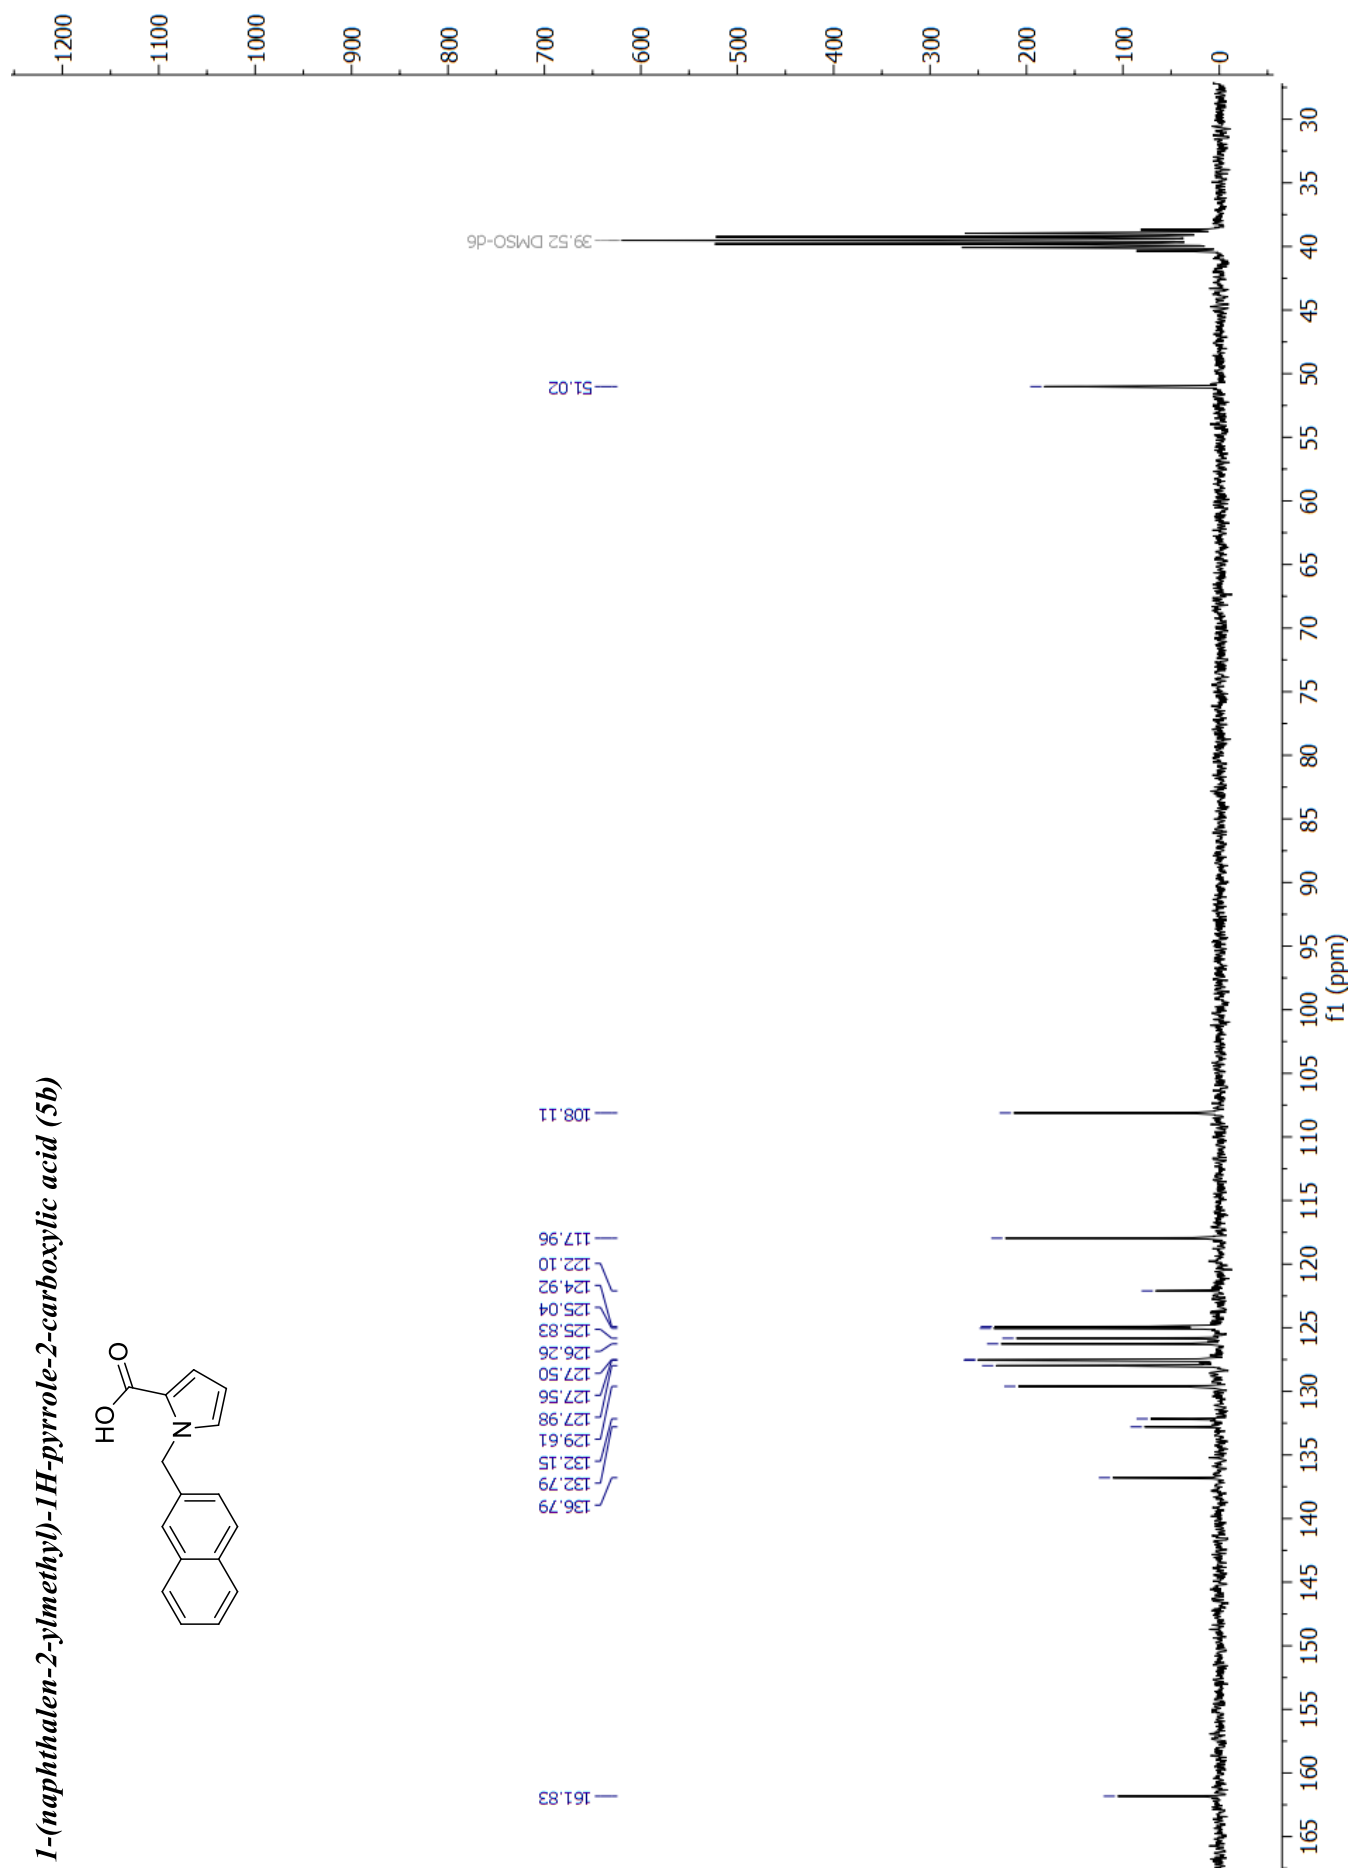

**1-(naphthalen-1-ylmethyl)-1H-indole-3-carboxylic acid (1a)**

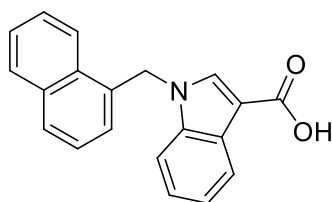

**Injection Details**

Injection Name: 1a  
Instrument Method: 10-90% 0.5 ml-min 6 min (MS) +FA  
Vial Number: G:D6  
Injection Date/Time: 16/Jun/23 12:28

**Chromatogram**

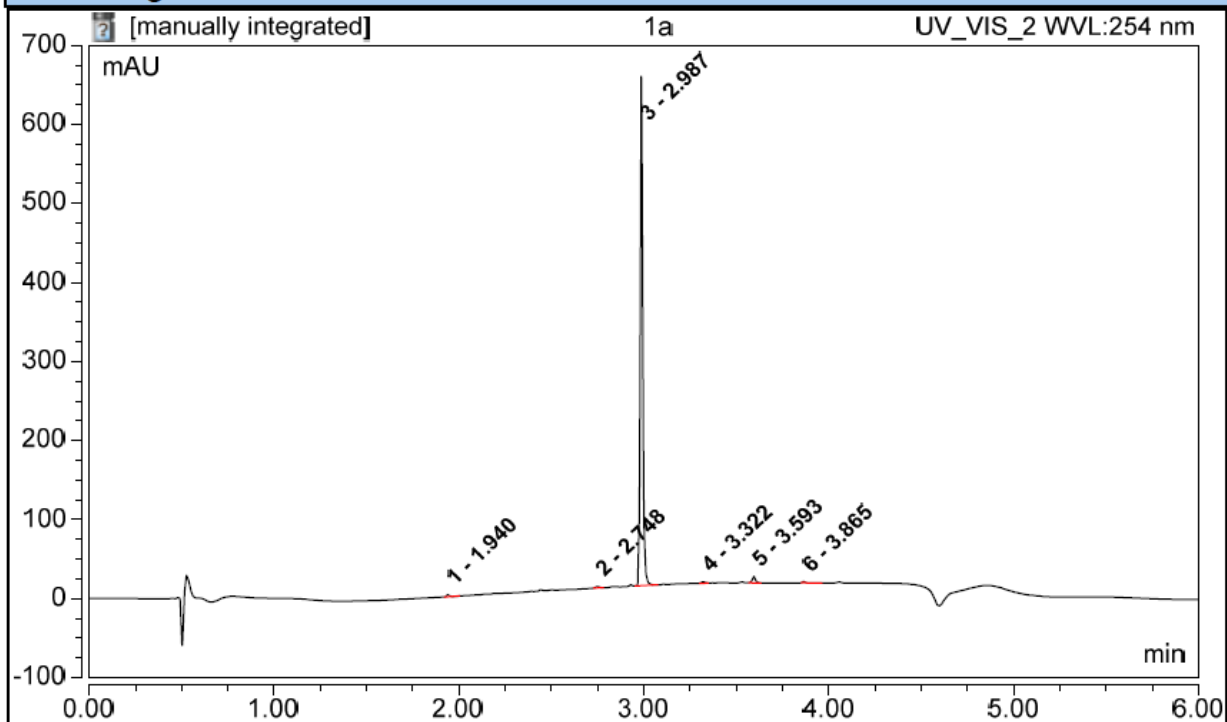

**Integration Results**

| No.    | Peak Name | Retention Time<br>min | Area<br>mAU*min | Relative Area<br>% |
|--------|-----------|-----------------------|-----------------|--------------------|
| 1      | 1a        | 1.940                 | 0.048           | 0.45               |
| 2      |           | 2.748                 | 0.040           | 0.37               |
| 3      |           | 2.987                 | 10.363          | 97.18              |
| 4      |           | 3.322                 | 0.034           | 0.32               |
| 5      |           | 3.593                 | 0.156           | 1.47               |
| 6      |           | 3.865                 | 0.023           | 0.21               |
| Total: |           |                       | 10.665          | 100.00             |

**1-(naphthalen-2-ylmethyl)-1H-indole-3-carboxylic acid (1b)**

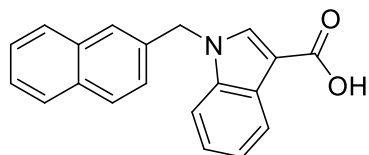

**Injection Details**

Injection Name: 1b  
Instrument Method: 10-90% 0.5 ml-min 6 min (MS) +FA  
Vial Number: G:B2  
Injection Date/Time: 29/May/23 22:33

**Chromatogram**

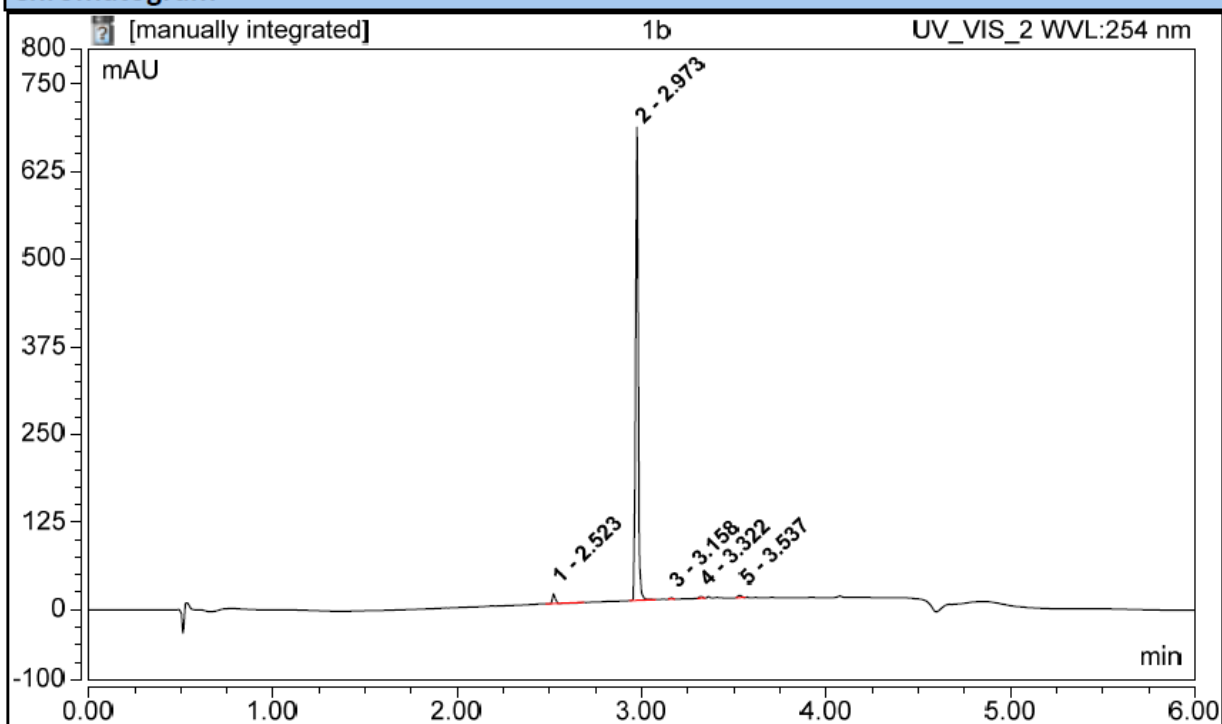

**Integration Results**

| No.    | Peak Name | Retention Time<br>min | Area<br>mAU*min | Relative Area<br>% |
|--------|-----------|-----------------------|-----------------|--------------------|
| 1      | 1b        | 2.523                 | 0.218           | 1.94               |
| 2      |           | 2.973                 | 10.809          | 96.44              |
| 3      |           | 3.158                 | 0.041           | 0.37               |
| 4      |           | 3.322                 | 0.054           | 0.49               |
| 5      |           | 3.537                 | 0.085           | 0.76               |
| Total: |           |                       | 11.208          | 100.00             |

**Sodium 1-(naphthalen-1-ylmethyl)-1H-indole-3-carboxylate (1c)**

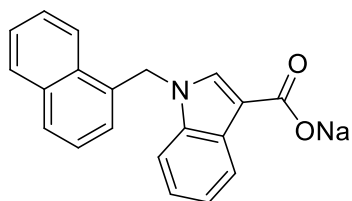

### Injection Details

**Injection Name:** 1c  
**Instrument Method:** 10-90% 0.5 ml-min 6 min (MS) +FA  
**Vial Number:** G:A6  
**Injection Date/Time:** 14/Apr/23 15:06

### Chromatogram

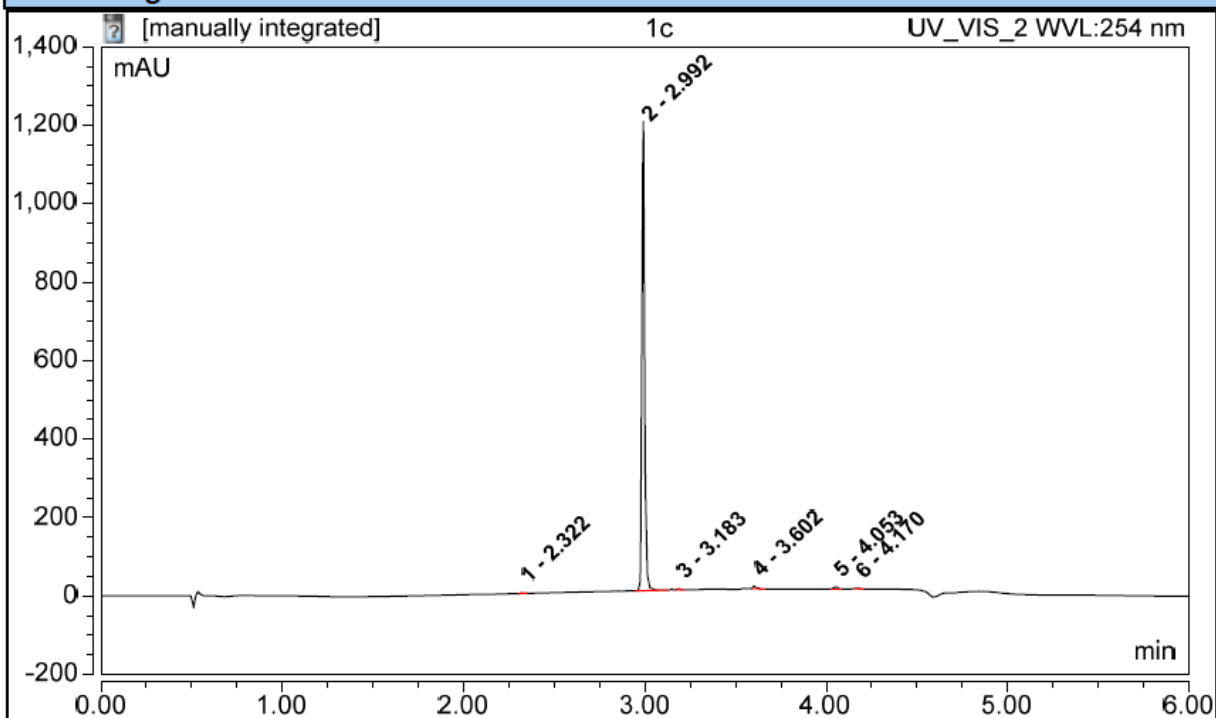

### Integration Results

| No.    | Peak Name | Retention Time<br>min | Area<br>mAU*min | Relative Area<br>% |
|--------|-----------|-----------------------|-----------------|--------------------|
| 1      | 1c        | 2.322                 | 0.019           | 0.09               |
| 2      |           | 2.992                 | 20.095          | 98.03              |
| 3      |           | 3.183                 | 0.053           | 0.26               |
| 4      |           | 3.602                 | 0.156           | 0.76               |
| 5      |           | 4.053                 | 0.133           | 0.65               |
| 6      |           | 4.170                 | 0.041           | 0.20               |
| Total: |           |                       | 20.498          | 100.00             |

**1-(naphthalen-1-ylmethyl)-1H-indole-2-carboxylic acid (2a)**

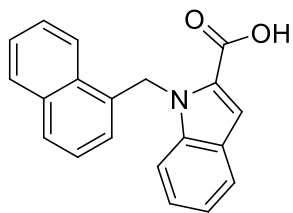

| Injection Details    |                                  |
|----------------------|----------------------------------|
| Injection Name:      | 2a                               |
| Instrument Method:   | 10-90% 0.5 ml-min 6 min (MS) +FA |
| Vial Number:         | G:A8                             |
| Injection Date/Time: | 18/Jul/23 14:57                  |

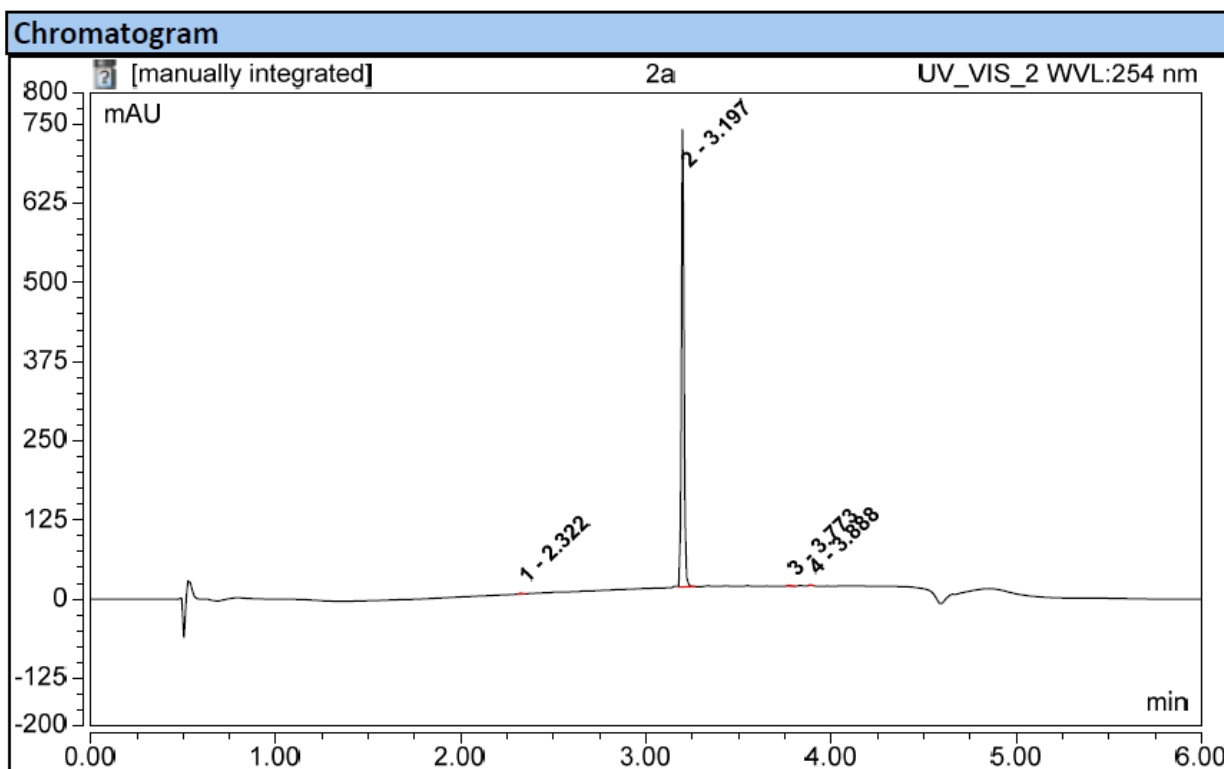

| Integration Results |           |                       |                 |                    |
|---------------------|-----------|-----------------------|-----------------|--------------------|
| No.                 | Peak Name | Retention Time<br>min | Area<br>mAU*min | Relative Area<br>% |
| 1                   | 2a        | 2.322                 | 0.021           | 0.18               |
| 2                   |           | 3.197                 | 11.986          | 99.36              |
| 3                   |           | 3.773                 | 0.024           | 0.20               |
| 4                   |           | 3.888                 | 0.032           | 0.27               |
| Total:              |           |                       | 12.063          | 100.00             |



**1-(naphthalen-2-ylmethyl)-1H-indole-2-carboxylic acid (2b)**

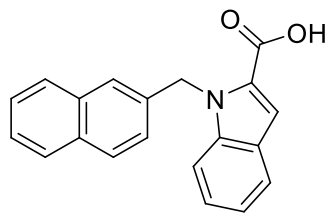

### Injection Details

**Injection Name:** 2b  
**Instrument Method:** 10-90% 0.5 ml-min 6 min (MS) +FA  
**Vial Number:** G:D5  
**Injection Date/Time:** 20/Jun/23 16:25

### Chromatogram

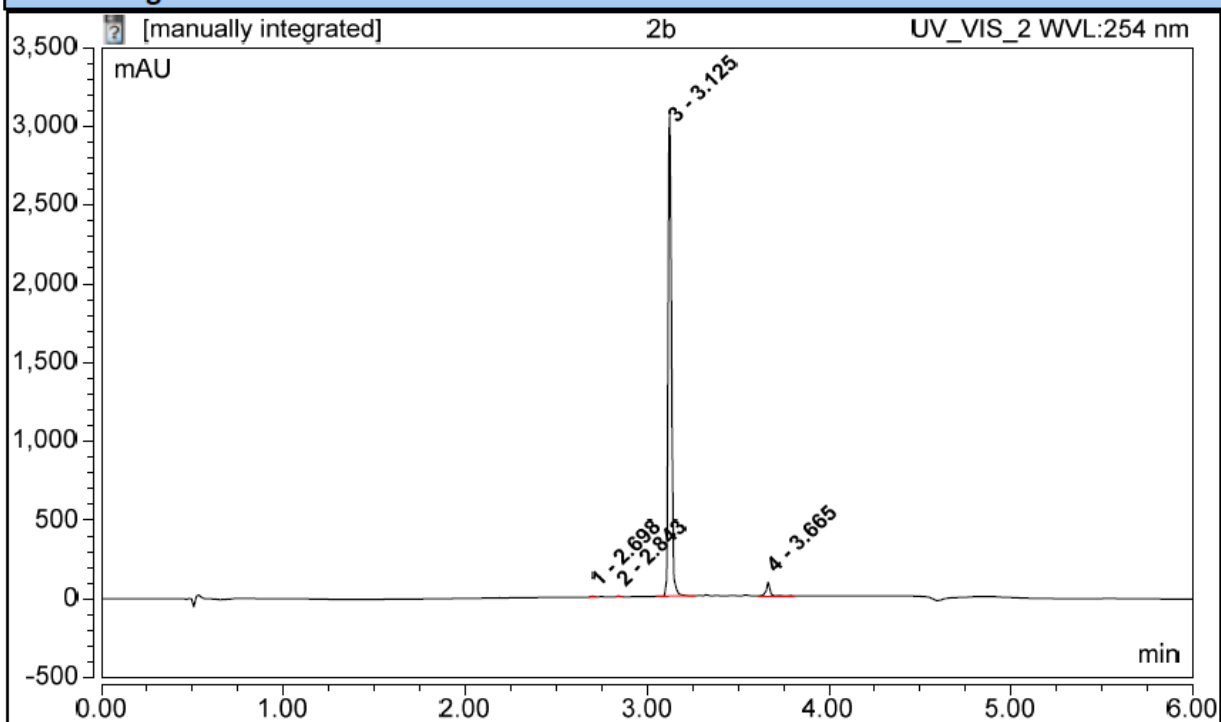

### Integration Results

| No.    | Peak Name | Retention Time<br>min | Area<br>mAU*min | Relative Area<br>% |
|--------|-----------|-----------------------|-----------------|--------------------|
| 1      | 2b        | 2.698                 | 0.118           | 0.18               |
| 2      |           | 2.843                 | 0.082           | 0.12               |
| 3      |           | 3.125                 | 65.085          | 97.12              |
| 4      |           | 3.665                 | 1.731           | 2.58               |
| Total: |           |                       | 67.017          | 100.00             |

**1-(naphthalen-1-ylmethyl)-1H-indole-5-carboxylic acid (3a)**

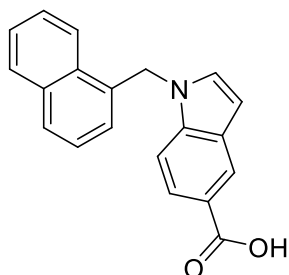

**Injection Details**

Injection Name: 3a  
Instrument Method: 10-90% 0.5 ml-min 6 min (MS) +FA  
Vial Number: G:A5  
Injection Date/Time: 16/Aug/23 15:14

**Chromatogram**

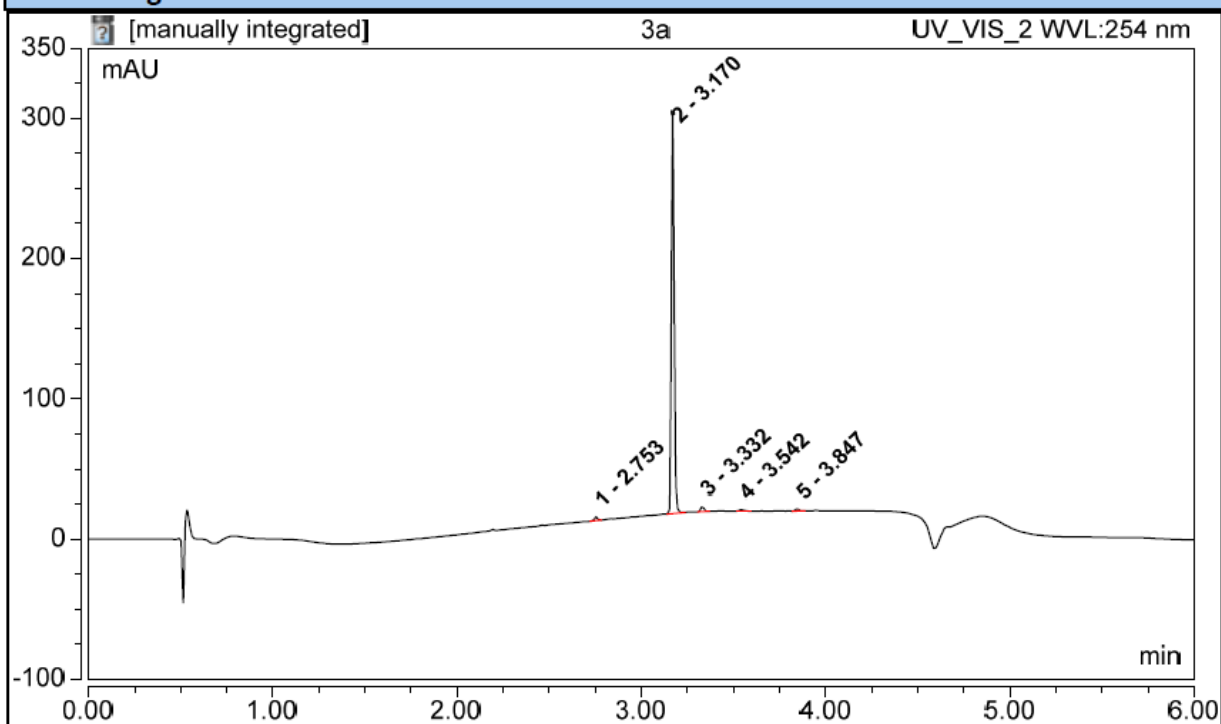

**Integration Results**

| No.    | Peak Name | Retention Time<br>min | Area<br>mAU*min | Relative Area<br>% |
|--------|-----------|-----------------------|-----------------|--------------------|
| 1      | 3a        | 2.753                 | 0.052           | 1.07               |
| 2      |           | 3.170                 | 4.720           | 96.29              |
| 3      |           | 3.332                 | 0.069           | 1.41               |
| 4      |           | 3.542                 | 0.026           | 0.52               |
| 5      |           | 3.847                 | 0.035           | 0.71               |
| Total: |           |                       | 4.901           | 100.00             |

**1-(naphthalen-2-ylmethyl)-1H-indole-6-carboxylic acid (3b)**

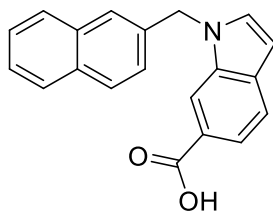

### Injection Details

**Injection Name:** 3b  
**Instrument Method:** 10-90% 0.5 ml-min 6 min (MS) +FA  
**Vial Number:** G:C9  
**Injection Date/Time:** 19/Jul/23 18:25

### Chromatogram

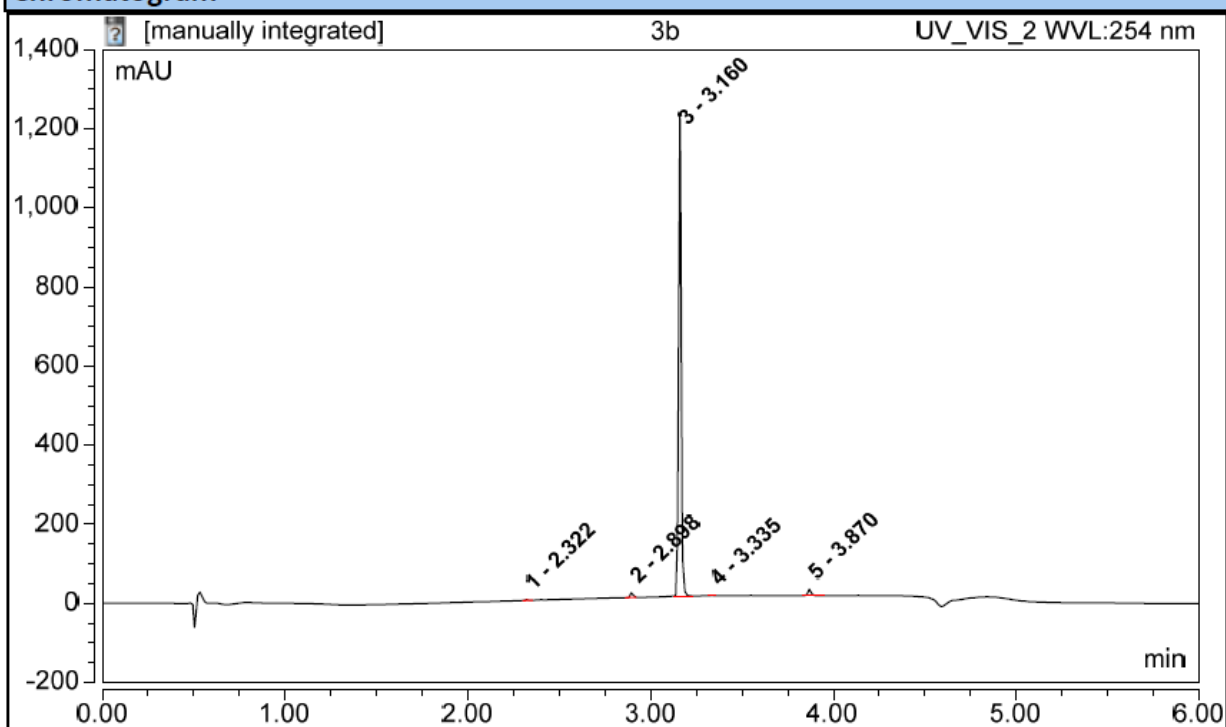

### Integration Results

| No.    | Peak Name | Retention Time<br>min | Area<br>mAU*min | Relative Area<br>% |
|--------|-----------|-----------------------|-----------------|--------------------|
| 1      | 3b        | 2.322                 | 0.033           | 0.16               |
| 2      |           | 2.898                 | 0.224           | 1.07               |
| 3      |           | 3.160                 | 20.295          | 97.16              |
| 4      |           | 3.335                 | 0.018           | 0.09               |
| 5      |           | 3.870                 | 0.318           | 1.52               |
| Total: |           |                       | 20.889          | 100.00             |

**1-(naphthalen-1-ylmethyl)-1H-indole-6-carboxylic acid (4a)**

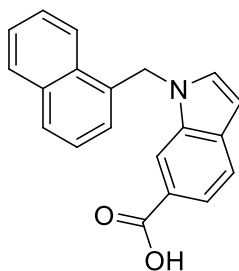

### Injection Details

**Injection Name:** 4a  
**Instrument Method:** 10-90% 0.5 ml-min 6 min (MS) +FA  
**Vial Number:** G:C6  
**Injection Date/Time:** 18/Apr/23 20:02

### Chromatogram

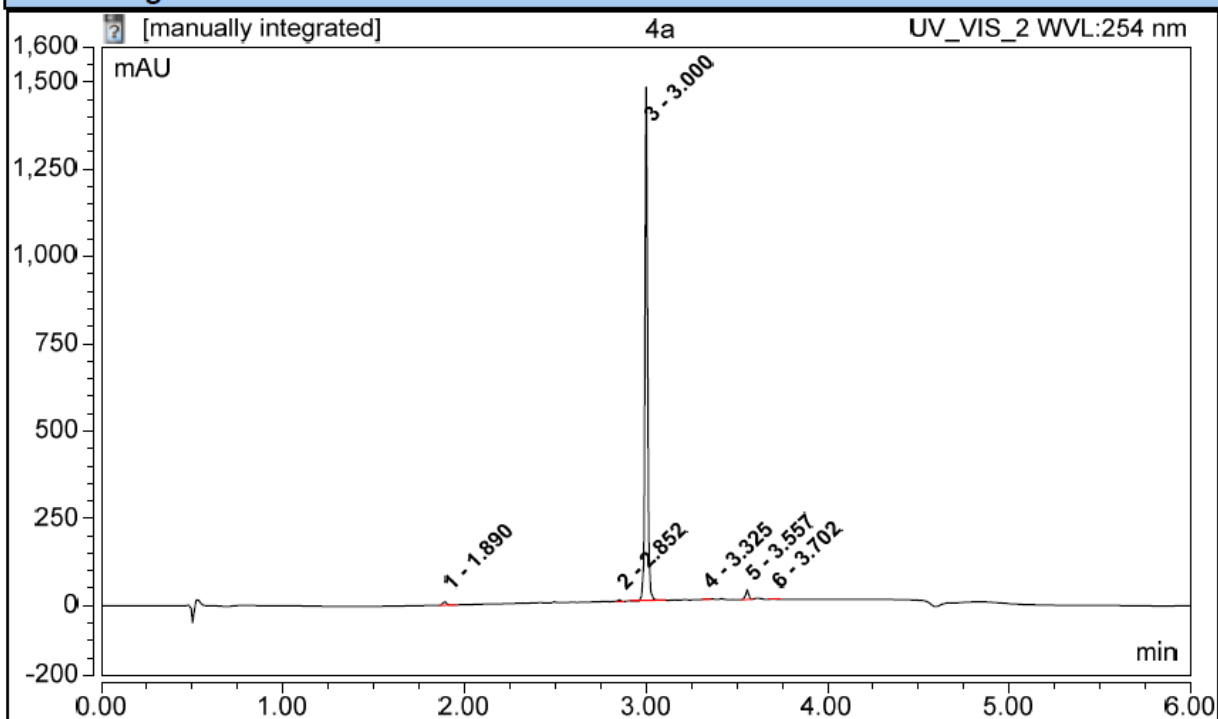

### Integration Results

| No.    | Peak Name | Retention Time<br>min | Area<br>mAU*min | Relative Area<br>% |
|--------|-----------|-----------------------|-----------------|--------------------|
| 1      | 4a        | 1.890                 | 0.218           | 0.86               |
| 2      |           | 2.852                 | 0.077           | 0.31               |
| 3      |           | 3.000                 | 24.329          | 96.51              |
| 4      |           | 3.325                 | 0.030           | 0.12               |
| 5      |           | 3.557                 | 0.490           | 1.94               |
| 6      |           | 3.702                 | 0.064           | 0.25               |
| Total: |           |                       | 25.208          | 100.00             |

**1-(naphthalen-2-ylmethyl)-1H-indole-5-carboxylic acid (4b)**

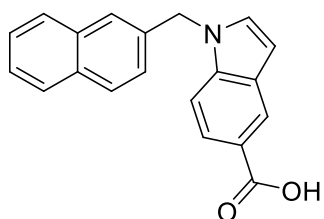

**Injection Details**

Injection Name: 4b  
Instrument Method: 10-90% 0.5 ml-min 6 min (MS) +FA  
Vial Number: G:B4  
Injection Date/Time: 29/May/23 22:51

**Chromatogram**

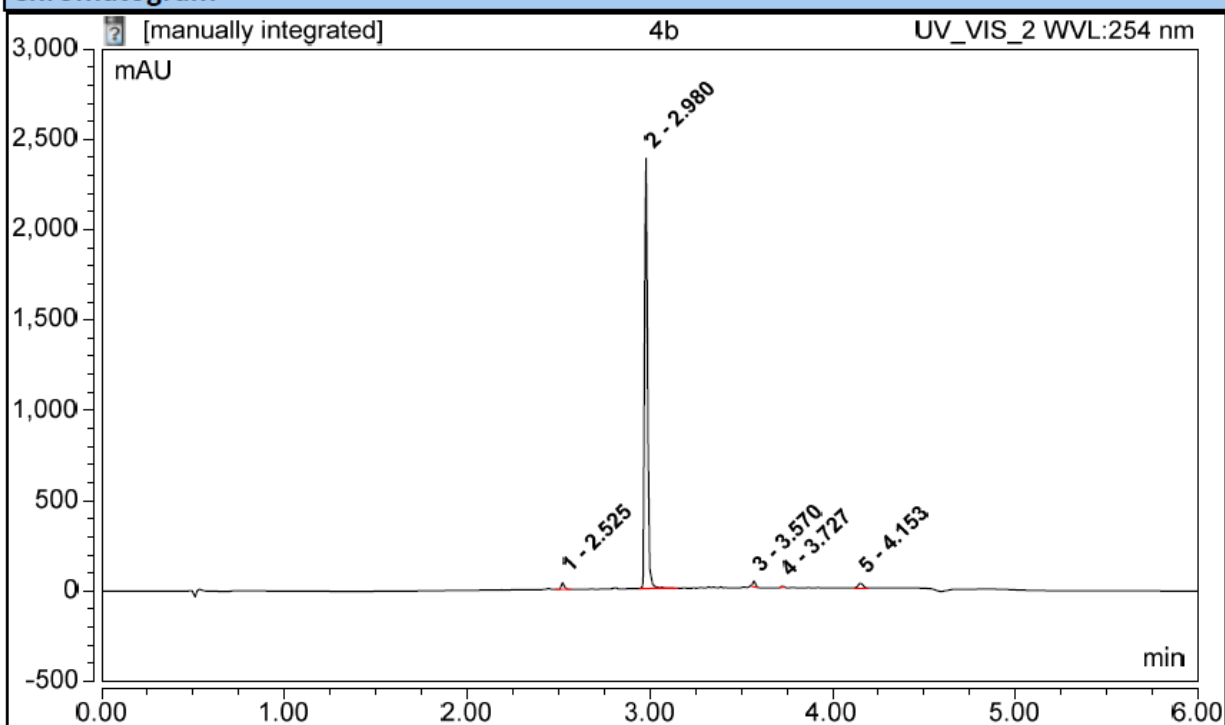

**Integration Results**

| No.    | Peak Name | Retention Time<br>min | Area<br>mAU*min | Relative Area<br>% |
|--------|-----------|-----------------------|-----------------|--------------------|
| 1      | 4b        | 2.525                 | 0.670           | 1.49               |
| 2      |           | 2.980                 | 43.050          | 95.51              |
| 3      |           | 3.570                 | 0.511           | 1.13               |
| 4      |           | 3.727                 | 0.136           | 0.30               |
| 5      |           | 4.153                 | 0.708           | 1.57               |
| Total: |           |                       | 45.076          | 100.00             |

**1-(naphthalen-1-ylmethyl)-1H-pyrrole-2-carboxylic acid (5a)**

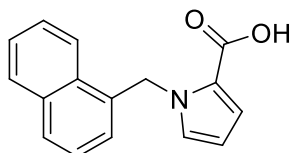

**Injection Details**

Injection Name: 5a  
Instrument Method: 10-90% 0.5 ml-min 6 min (MS) +FA  
Vial Number: G:B8  
Injection Date/Time: 15/Jun/23 11:29

**Chromatogram**

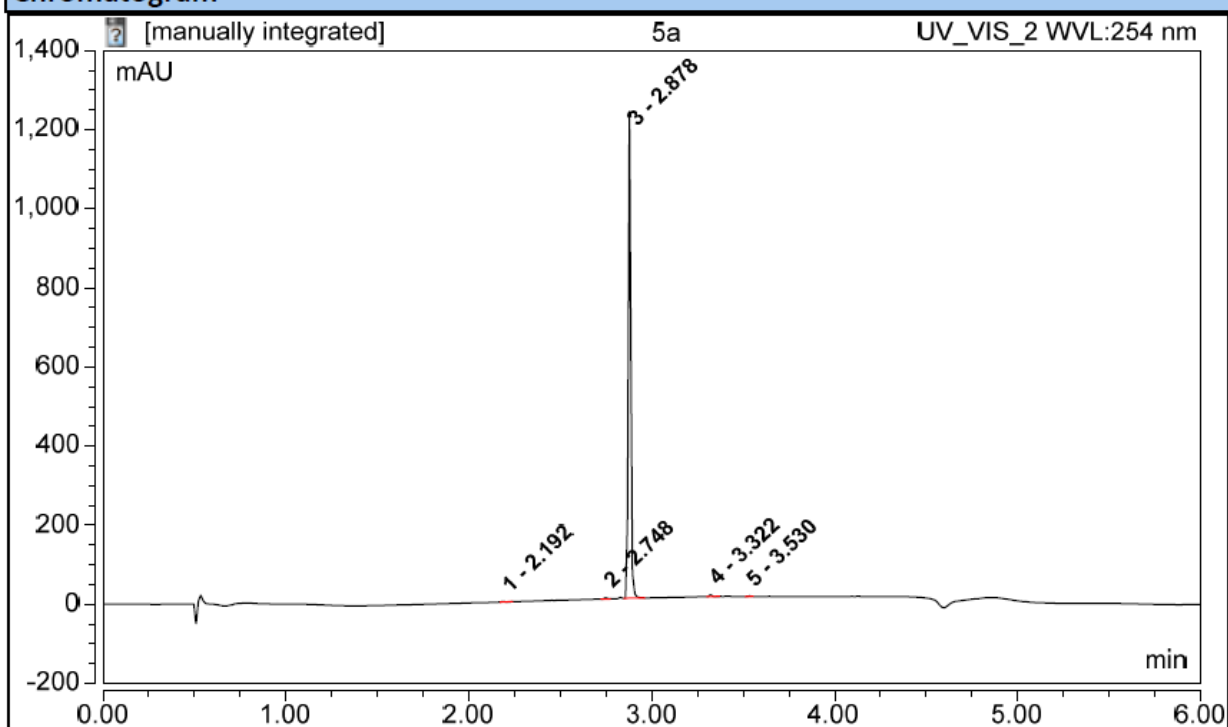

**Integration Results**

| No.    | Peak Name | Retention Time<br>min | Area<br>mAU*min | Relative Area<br>% |
|--------|-----------|-----------------------|-----------------|--------------------|
| 1      | 5a        | 2.192                 | 0.015           | 0.07               |
| 2      |           | 2.748                 | 0.063           | 0.31               |
| 3      |           | 2.878                 | 19.730          | 99.11              |
| 4      |           | 3.322                 | 0.075           | 0.38               |
| 5      |           | 3.530                 | 0.024           | 0.12               |
| Total: |           |                       | 19.907          | 100.00             |

**1-(naphthalen-2-ylmethyl)-1H-pyrrole-2-carboxylic acid (5b)**

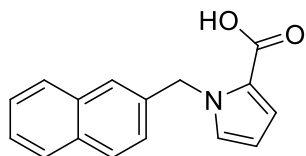

**Injection Details**

Injection Name: 5b  
Instrument Method: 10-90% 0.5 ml-min 6 min (MS) +FA  
Vial Number: G:A5  
Injection Date/Time: 23/May/23 12:10

**Chromatogram**

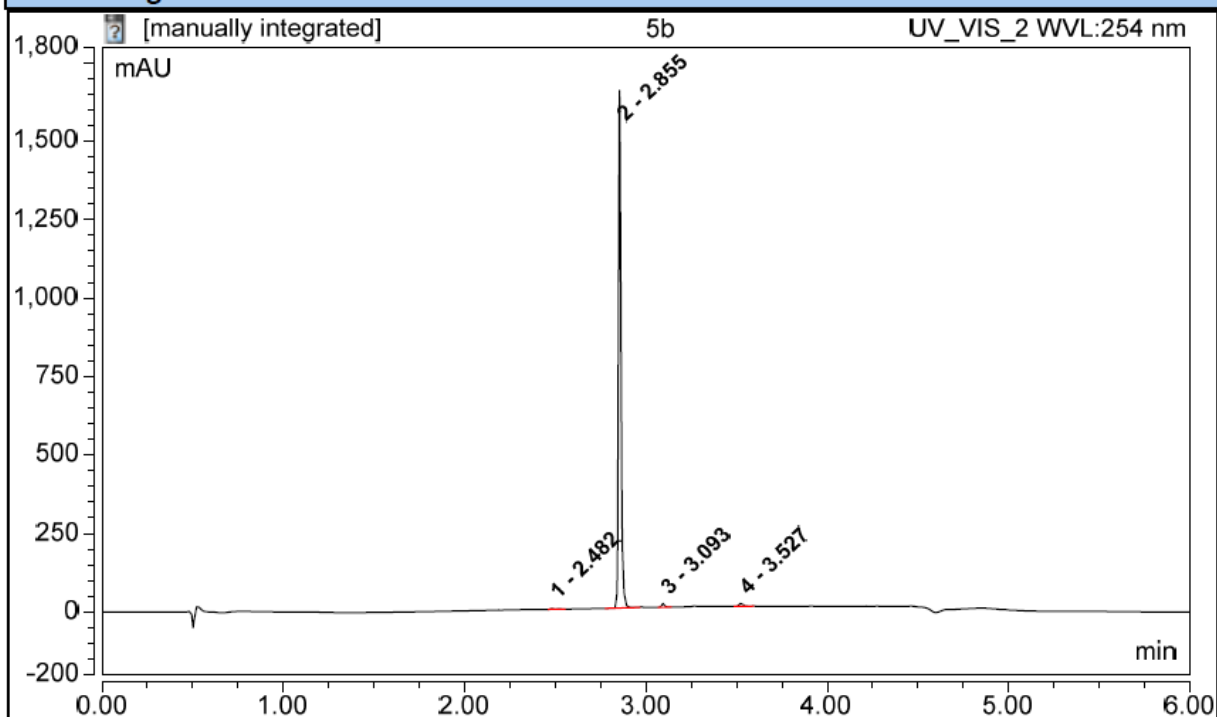

**Integration Results**

| No.    | Peak Name | Retention Time<br>min | Area<br>mAU*min | Relative Area<br>% |
|--------|-----------|-----------------------|-----------------|--------------------|
| 1      | 5b        | 2.482                 | 0.072           | 0.27               |
| 2      |           | 2.855                 | 26.584          | 98.14              |
| 3      |           | 3.093                 | 0.206           | 0.76               |
| 4      |           | 3.527                 | 0.227           | 0.84               |
| Total: |           |                       | 27.089          | 100.00             |

## References

23. McWilliam, H.; Li, W.; Uludag, M.; Squizzato, S.; Park, Y.M.; Buso, N.; Cowley, A.P.; Lopez, R. Analysis Tool Web Services from the EMBL-EBI. *Nucleic Acids Res.* **2013**, *41*, W597–W600, doi:10.1093/nar/gkt376.
54. Subhas Bose, D.; Idrees, M.; Todewale, I.K.; Jakka, N.M.; Venkateswara Rao, J. Hybrids of Privileged Structures Benzothiazoles and Pyrrolo[2,1-c] [1,4]Benzodiazepin-5-One, and Diversity-Oriented Synthesis of Benzothiazoles. *Eur.J. Med. Chem.* **2012**, *50*, 27–38, doi:10.1016/j.ejmech.2012.01.014.
55. Yang, T.; Li, X.; Deng, S.; Qi, X.; Cong, H.; Cheng, H.-G.; Shi, L.; Zhou, Q.; Zhuang, L. From N–H Nitration to Controllable Aromatic Mononitration and Dinitration—The Discovery of a Versatile and Powerful *N*-Nitropyrazole Nitrating Reagent. *JACS Au* **2022**, *2*, 2152–2161, doi:10.1021/jacsau.2c00413.
56. Brown, F.J.; Cronk, L.A.; Aharony, D.; Snyder, D.W. 1,3,6-Trisubstituted Indoles as Peptidoleukotriene Antagonists: Benefits of a Second, Polar, Pyrrole Substituent. *J. Med. Chem.* **1992**, *35*, 2419–2439, doi:10.1021/jm00091a010.
57. Houck, H.A.; Blasco, E.; Du Prez, F.E.; Barner-Kowollik, C. Light-Stabilized Dynamic Materials. *J. Am. Chem. Soc.* **2019**, *141*, 12329–12337, doi:10.1021/jacs.9b05092.
58. Young, B.M.; Rossi, P.; Slavish, P.J.; Cui, Y.; Sowaileh, M.; Das, J.; Kalodimos, C.G.; Rankovic, Z. Synthesis of Isotopically Labeled, Spin-Isolated Tyrosine and Phenylalanine for Protein NMR Applications. *Org. Lett.* **2021**, *23*, 6288–6292, doi:10.1021/acs.orglett.1c02084.
59. Verma, A.K.; Fatima, K.; Dudi, R.K.; Tabassum, M.; Iqbal, H.; Kumar, Y.; Luqman, S.; Mondhe, D.M.; Chanda, D.; Khan, F.; et al. Antiproliferative Activity of Diarylnaphthylpyrrolidine Derivative via Dual Target Inhibition. *Eur. J. Med. Chem.* **2020**, *188*, doi:10.1016/j.ejmech.2019.111986.
60. Portolani, C.; Centonze, G.; Luciani, S.; Pellegrini, A.; Righi, P.; Mazzanti, A.; Ciogli, A.; Sorato, A.; Bencivenni, G. Synthesis of Atropisomeric Hydrazides by One-Pot Sequential Enantio- and Diastereoselective Catalysis. *Angewandte Chemie International Edition* **2022**, *61*, doi:10.1002/anie.202209895.
